# Supplementary material for: Synthesis, Characterization, and In Vitro Cancer Cell Growth Inhibition Evaluation of Novel Phosphatidylcholines with Anisic and Veratric Acids
Source: PubMed Central journal article supplement (PMC6222722; doi:10.3390/molecules23082022), 2018-08-13

# Synthesis, characterization and in vitro cancer cell growth inhibition evaluation of novel phosphatidylcholines with anisic and veratric acids

Marta Czarnačka <sup>1,\*</sup>, Marta Świtalska <sup>2</sup>, Joanna Wietrzyk <sup>2</sup>, Gabriela Maciejewska <sup>3</sup>, Anna Gliszczyńska <sup>1,\*</sup>

<sup>1</sup> Department of Chemistry, Wrocław University of Environmental and Life Sciences, Norwida 25, 50-375 Wrocław, Poland

<sup>2</sup> Ludwik Hirszfeld Institute of Immunology and Experimental Therapy, Polish Academy of Sciences, Department of Experimental Oncology, Weigla 12, 53-114 Wrocław, Poland

<sup>3</sup> Central Laboratory of the Instrumental Analysis, Wrocław University of Technology, Wybrzeże Wyspiańskiego 27, Wrocław 50-370, Poland

\* Correspondence: [anna.gliszczyńska@wp.pl](mailto:anna.gliszczyńska@wp.pl), [marta.b.czarnecka@gmail.com](mailto:marta.b.czarnecka@gmail.com); Tel.: +48-71-320-5183

## Content

|                                                                      |    |
|----------------------------------------------------------------------|----|
| Figure S1: <sup>1</sup> H NMR spectrum of 3a.....                    | 4  |
| Figure S2: <sup>13</sup> C NMR spectrum of 3a.....                   | 5  |
| Figure S3: <sup>31</sup> P NMR spectrum of 3a.....                   | 6  |
| Figure S4: <sup>1</sup> H – <sup>1</sup> H COSY spectrum of 3a.....  | 7  |
| Figure S5: HSQC spectrum of 3a.....                                  | 8  |
| Figure S6: <sup>1</sup> H NMR spectrum of 3b.....                    | 10 |
| Figure S7: <sup>13</sup> C NMR spectrum of 3b.....                   | 11 |
| Figure S8: <sup>31</sup> P NMR spectrum of 3b.....                   | 12 |
| Figure S9: <sup>1</sup> H – <sup>1</sup> H COSY spectrum of 3b.....  | 13 |
| Figure S10: HSQC spectrum of 3b.....                                 | 14 |
| Figure S11: <sup>1</sup> H NMR spectrum of 5a.....                   | 16 |
| Figure S12: <sup>13</sup> C NMR spectrum of 5a.....                  | 17 |
| Figure S13: <sup>31</sup> P NMR spectrum of 5a.....                  | 18 |
| Figure S14: <sup>1</sup> H – <sup>1</sup> H COSY spectrum of 5a..... | 19 |
| Figure S15: HSQC spectrum of 5a.....                                 | 20 |
| Figure S16: <sup>1</sup> H NMR spectrum of 5b.....                   | 22 |
| Figure S17: <sup>13</sup> C NMR spectrum of 5b.....                  | 23 |
| Figure S18: <sup>31</sup> P NMR spectrum of 5b.....                  | 24 |

|                                                                |    |
|----------------------------------------------------------------|----|
| Figure S19: $^1\text{H} - ^1\text{H}$ COSY spectrum of 5b..... | 25 |
| Figure S20: HSQC spectrum of 5b. ....                          | 26 |
| Figure S21: $^1\text{H}$ NMR spectrum of 7a. ....              | 28 |
| Figure S22: $^{13}\text{C}$ NMR spectrum of 7a. ....           | 29 |
| Figure S23: $^{31}\text{P}$ NMR spectrum of 7a.....            | 30 |
| Figure S24: $^1\text{H} - ^1\text{H}$ COSY spectrum of 7a..... | 31 |
| Figure S25: HSQC spectrum of 7a. ....                          | 32 |
| Figure S26: $^1\text{H}$ NMR spectrum of 7b. ....              | 34 |
| Figure S27: $^{13}\text{C}$ NMR spectrum of 7b. ....           | 35 |
| Figure S28: $^{31}\text{P}$ NMR spectrum of 7b.....            | 36 |
| Figure S29: $^1\text{H} - ^1\text{H}$ COSY spectrum of 7b..... | 37 |
| Figure S30: HSQC spectrum of 7b. ....                          | 38 |
| Figure S31: $^1\text{H}$ NMR spectrum of 8a. ....              | 40 |
| Figure S32: $^{13}\text{C}$ NMR spectrum of 8a. ....           | 41 |
| Figure S33: $^{31}\text{P}$ NMR spectrum of 8a.....            | 42 |
| Figure S34: $^1\text{H} - ^1\text{H}$ COSY spectrum of 8a..... | 43 |
| Figure S35: HSQC spectrum of 8a. ....                          | 44 |
| Figure S36: $^1\text{H}$ NMR spectrum of 8b. ....              | 46 |
| Figure S37: $^{13}\text{C}$ NMR spectrum of 8b. ....           | 47 |
| Figure S38: $^{31}\text{P}$ NMR spectrum of 8b.....            | 48 |
| Figure S39: $^1\text{H} - ^1\text{H}$ COSY spectrum of 8b..... | 49 |
| Figure S40: HSQC spectrum of 8b. ....                          | 50 |

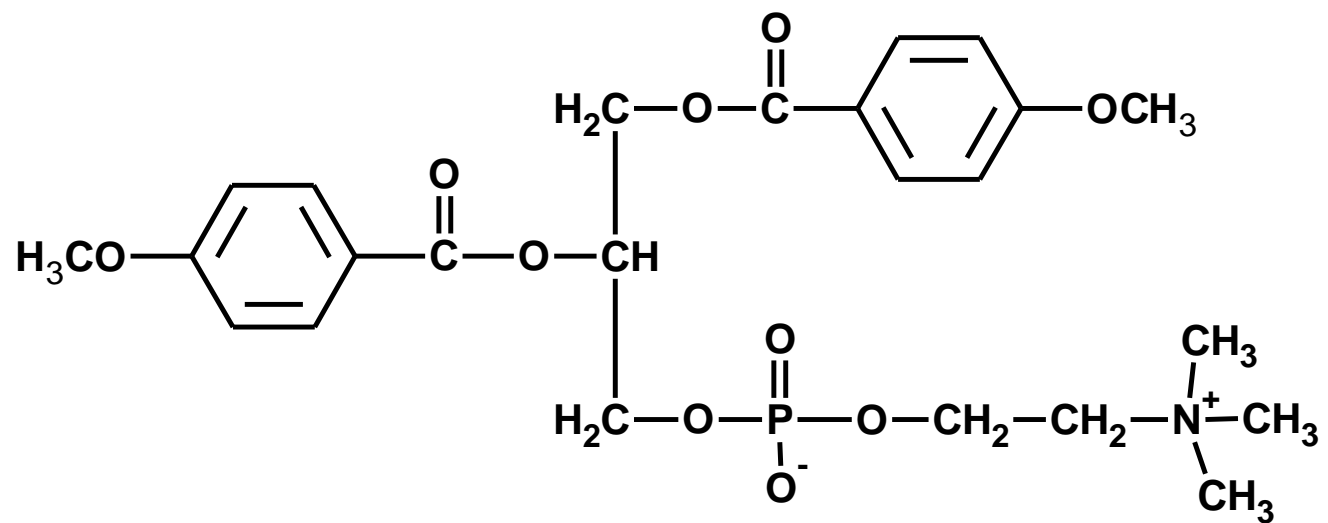

1,2-dianisoyl-*sn*-glycero-3-phosphocholine (3a)

Figure S1:  $^1\text{H}$  NMR spectrum of 3a.

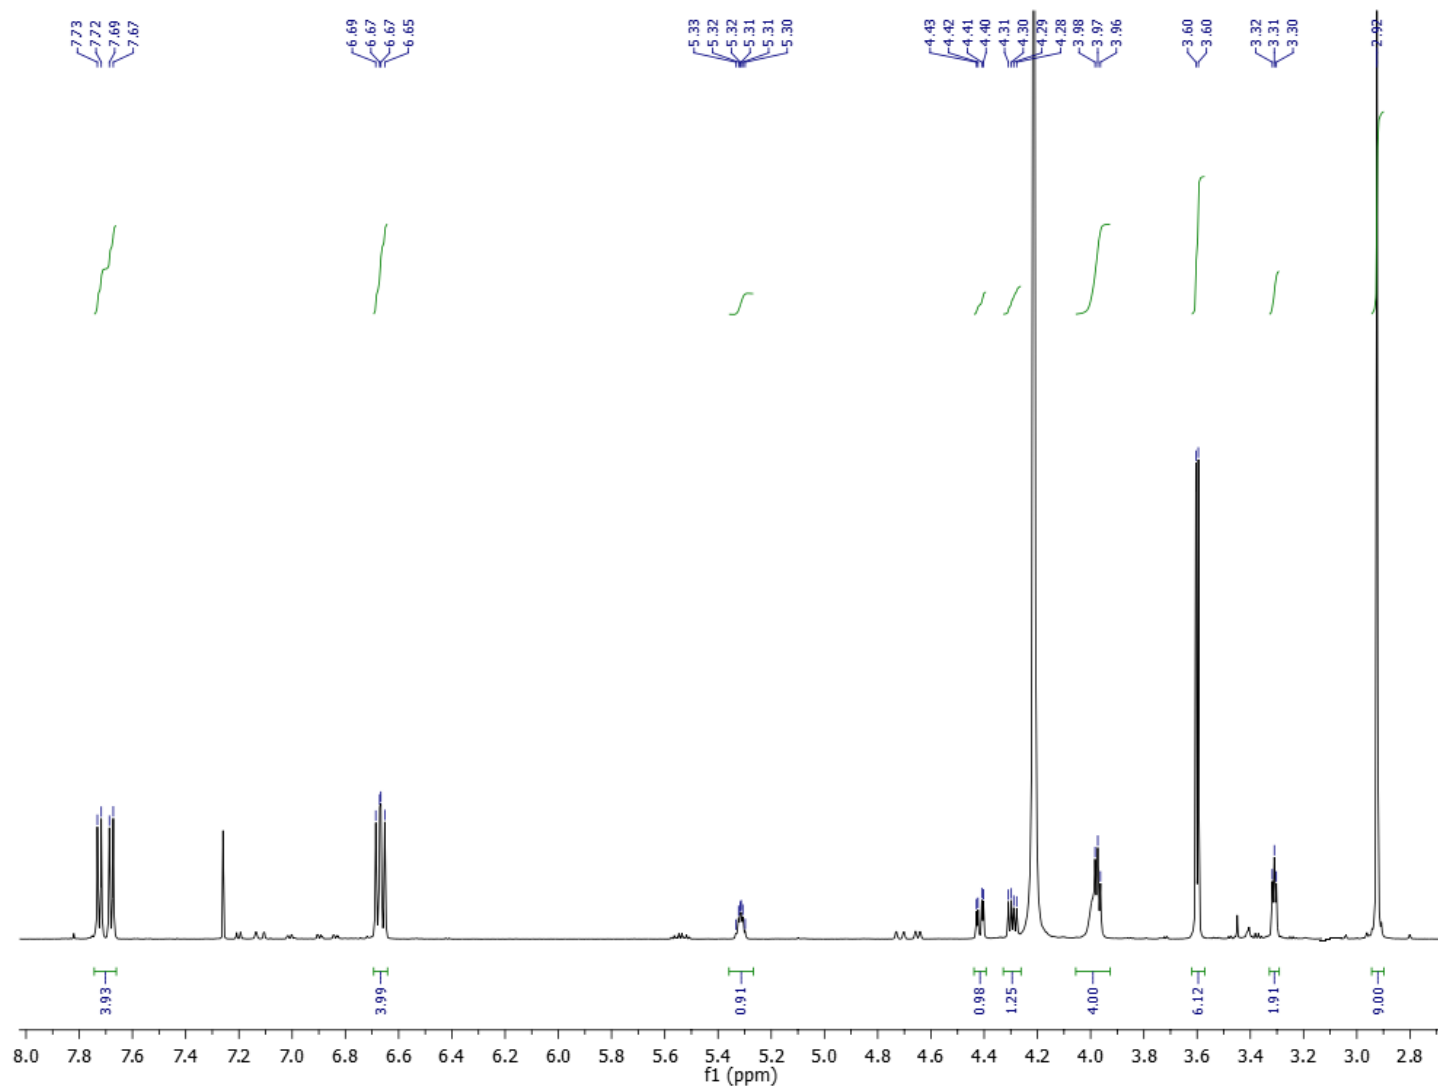

Figure S2:  $^{13}\text{C}$  NMR spectrum of 3a.

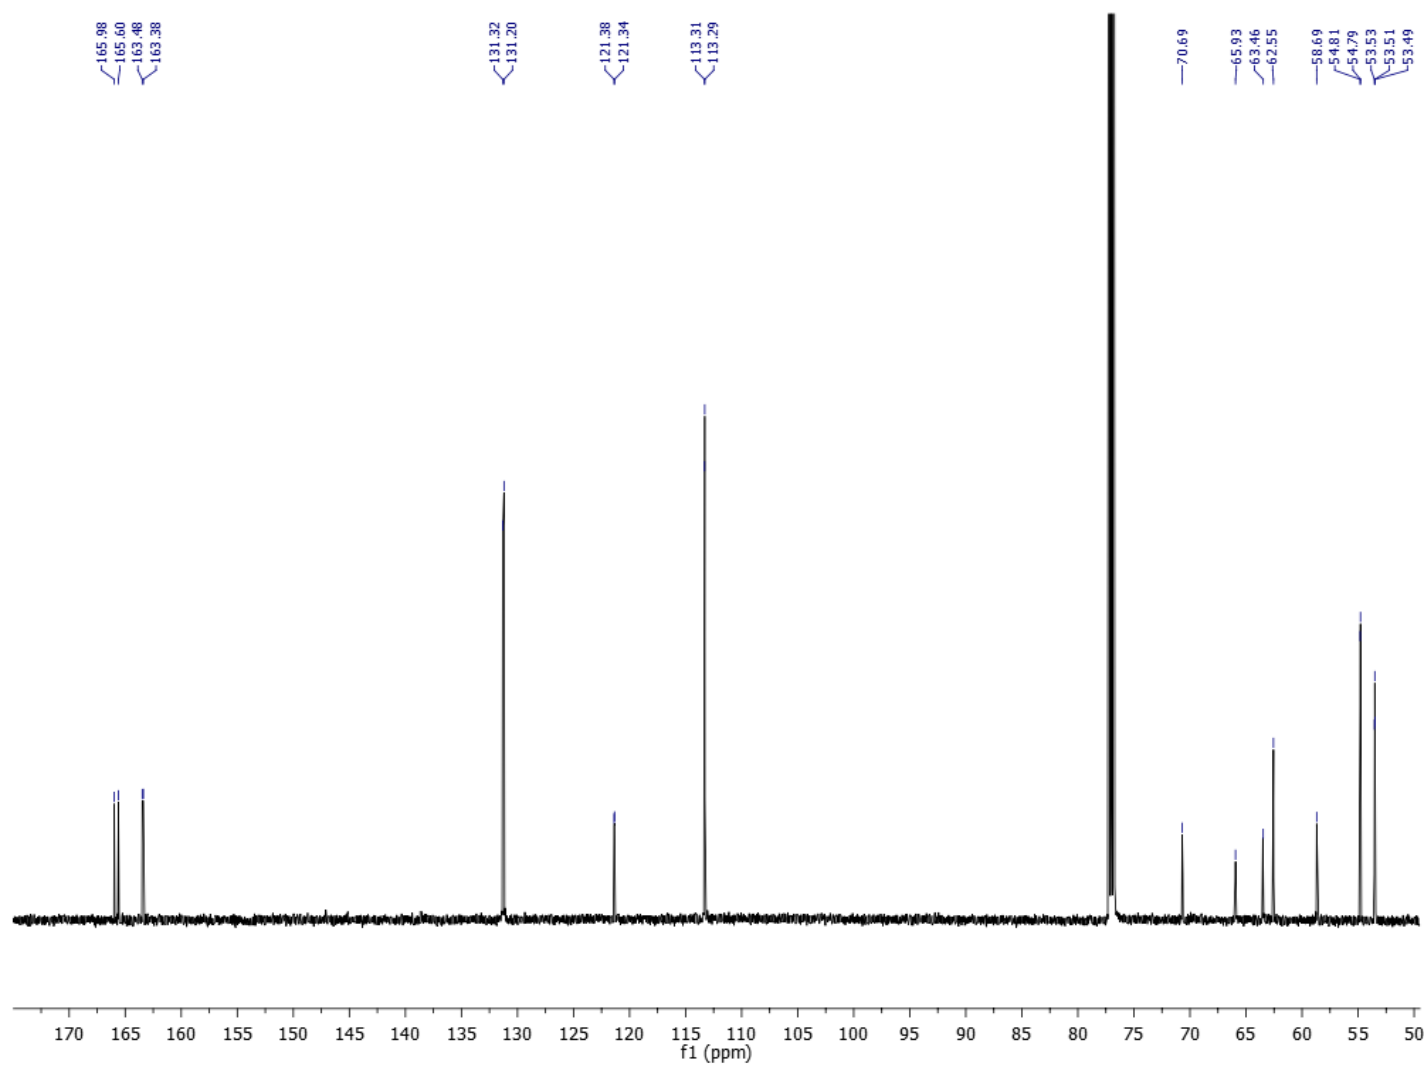

Figure S3:  $^{31}\text{P}$  NMR spectrum of 3a.

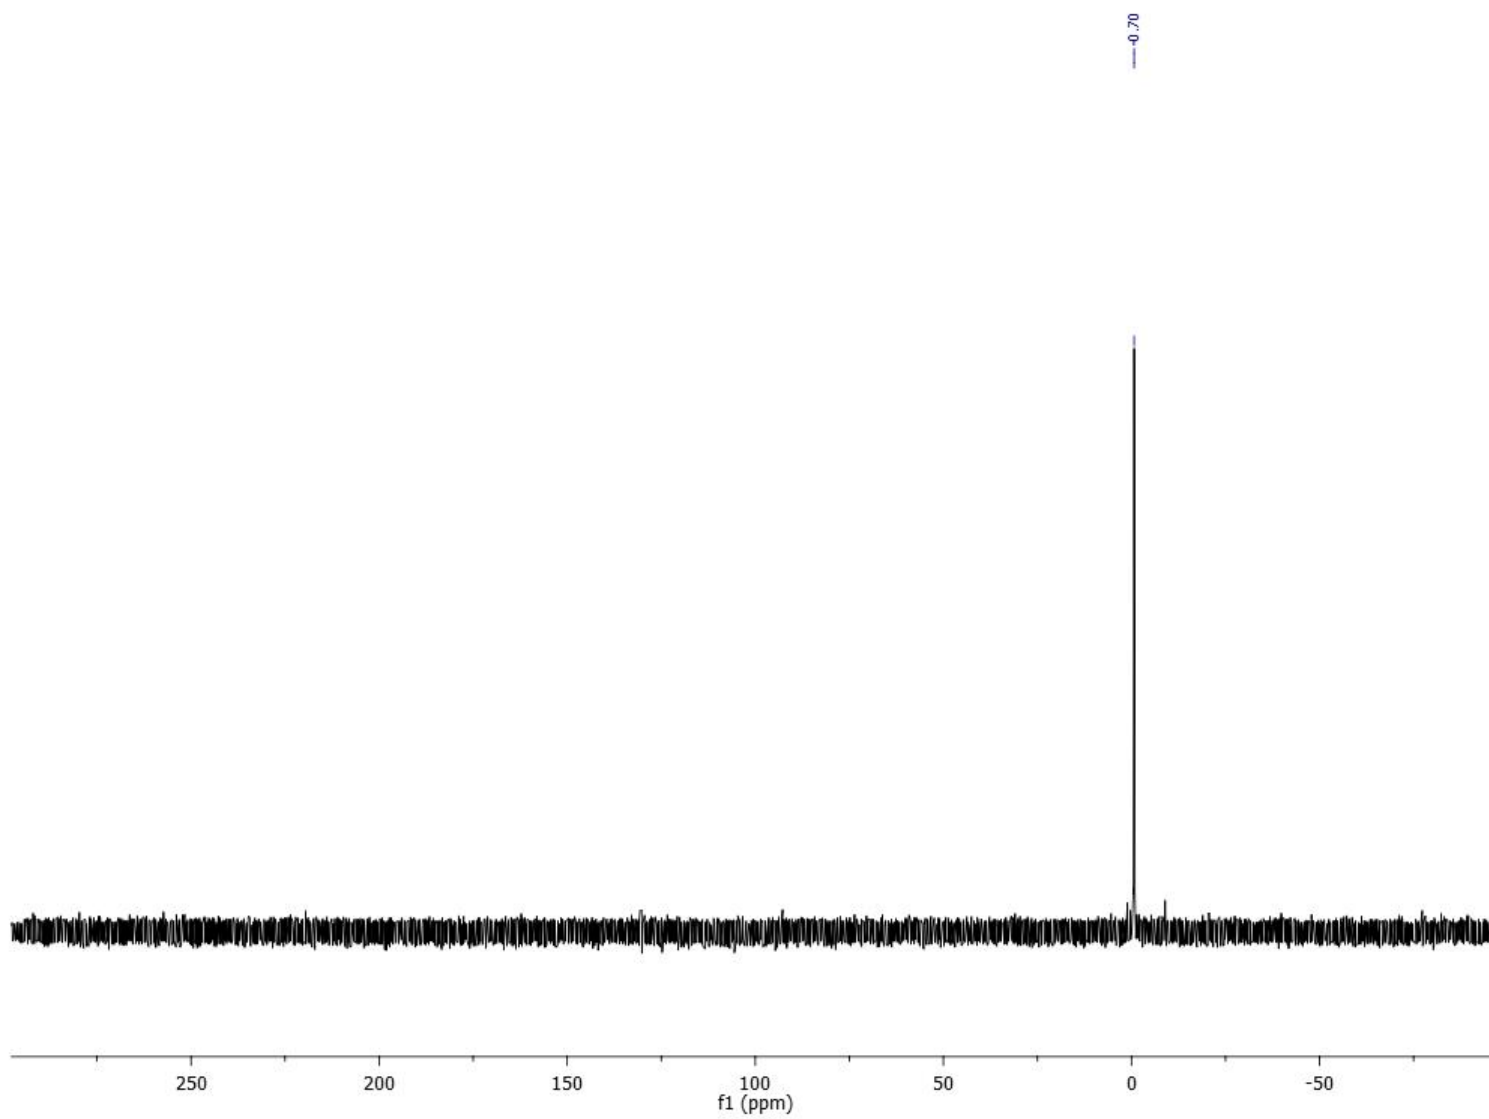

Figure S4:  $^1\text{H} - ^1\text{H}$  COSY spectrum of 3a.

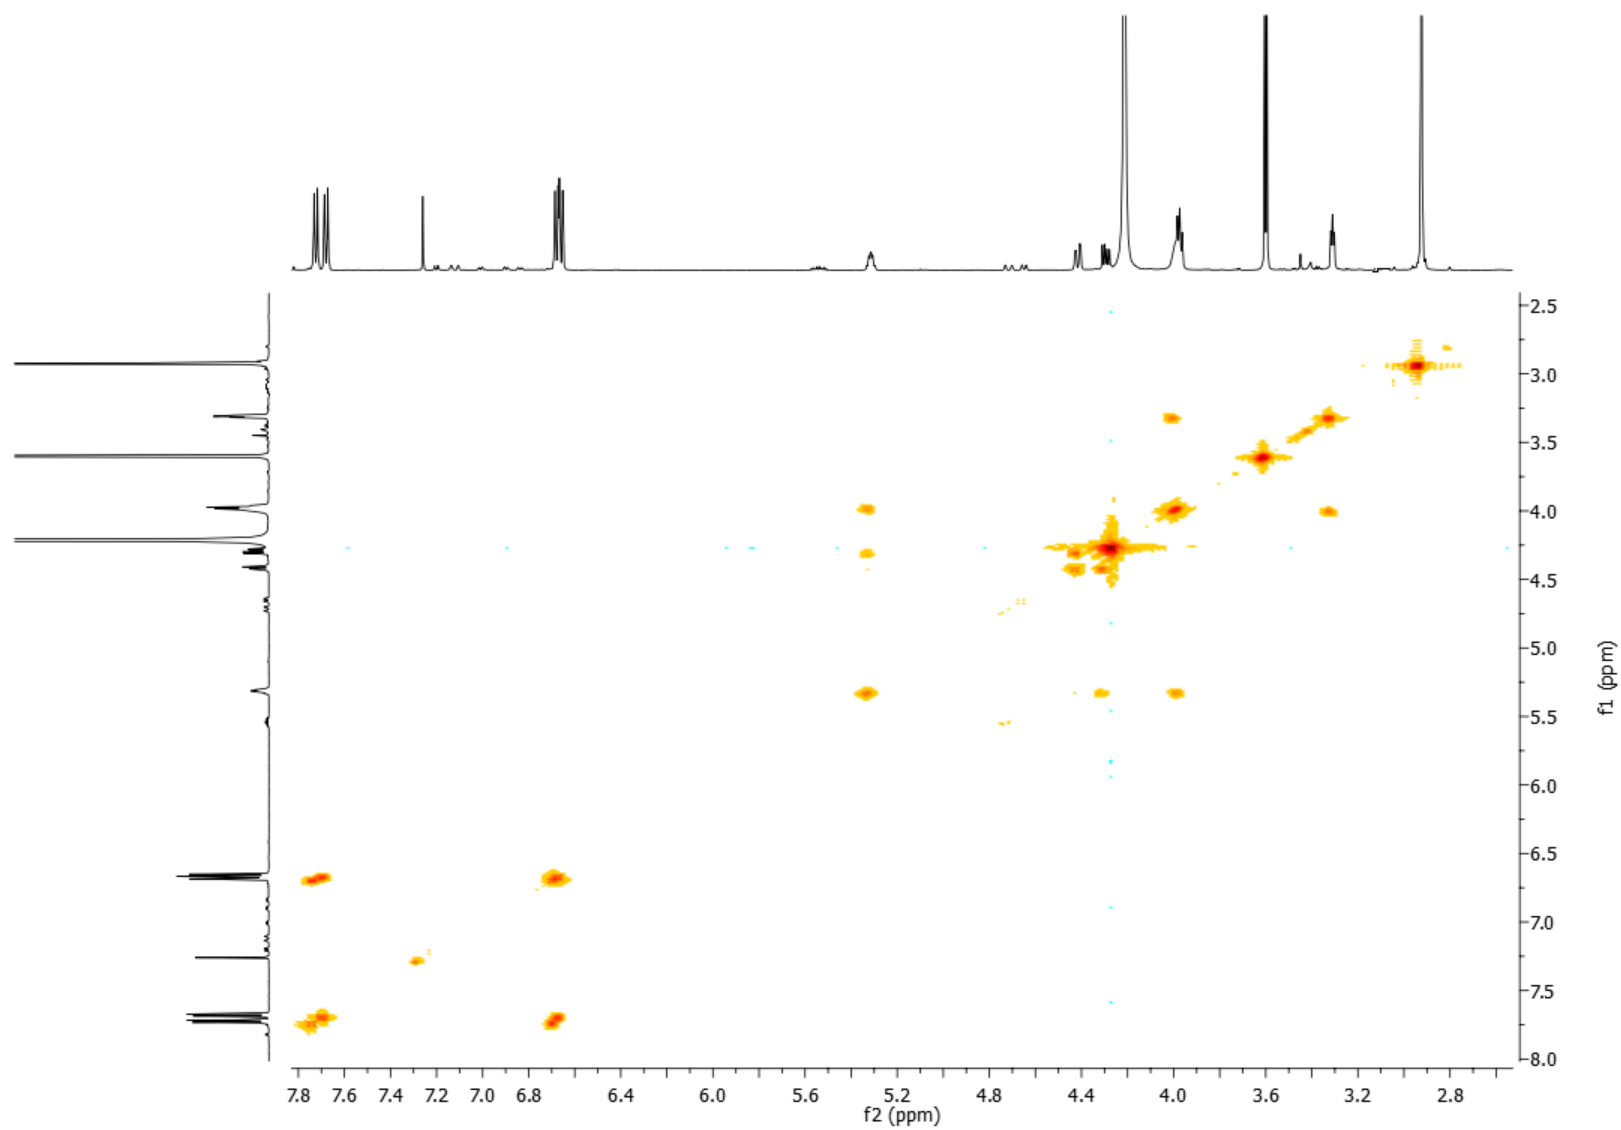

Figure S5: HSQC spectrum of 3a.

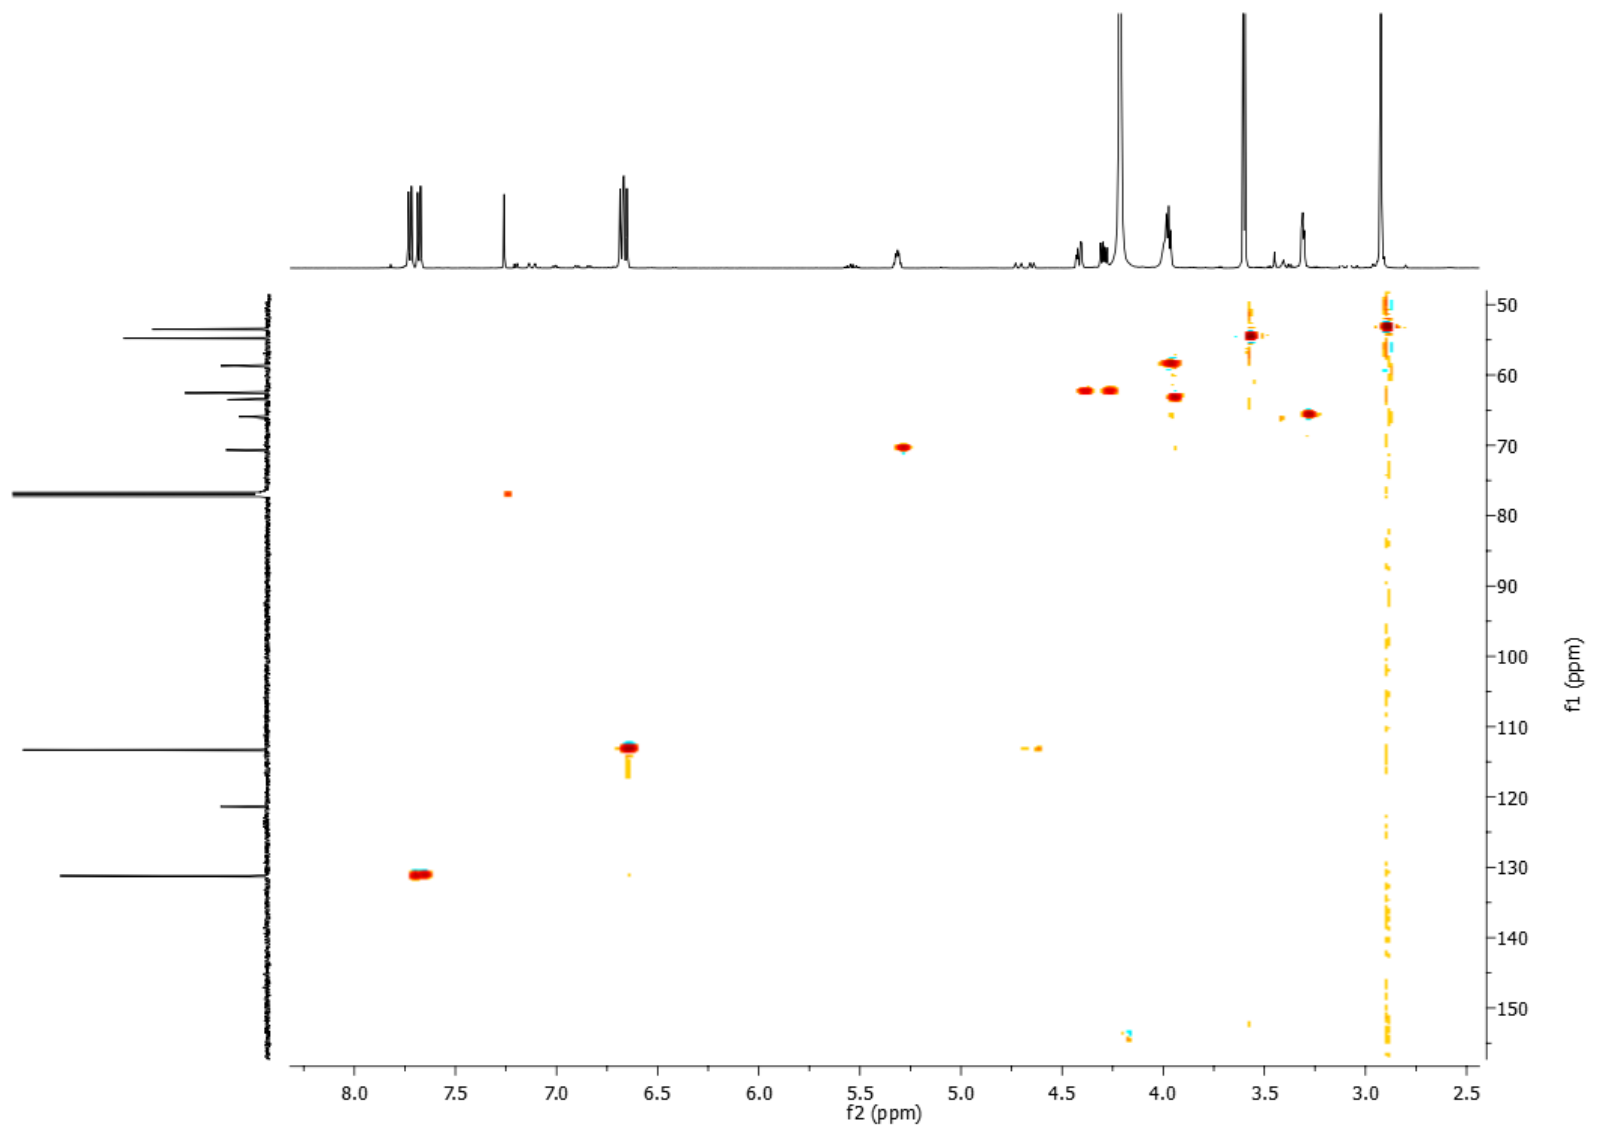



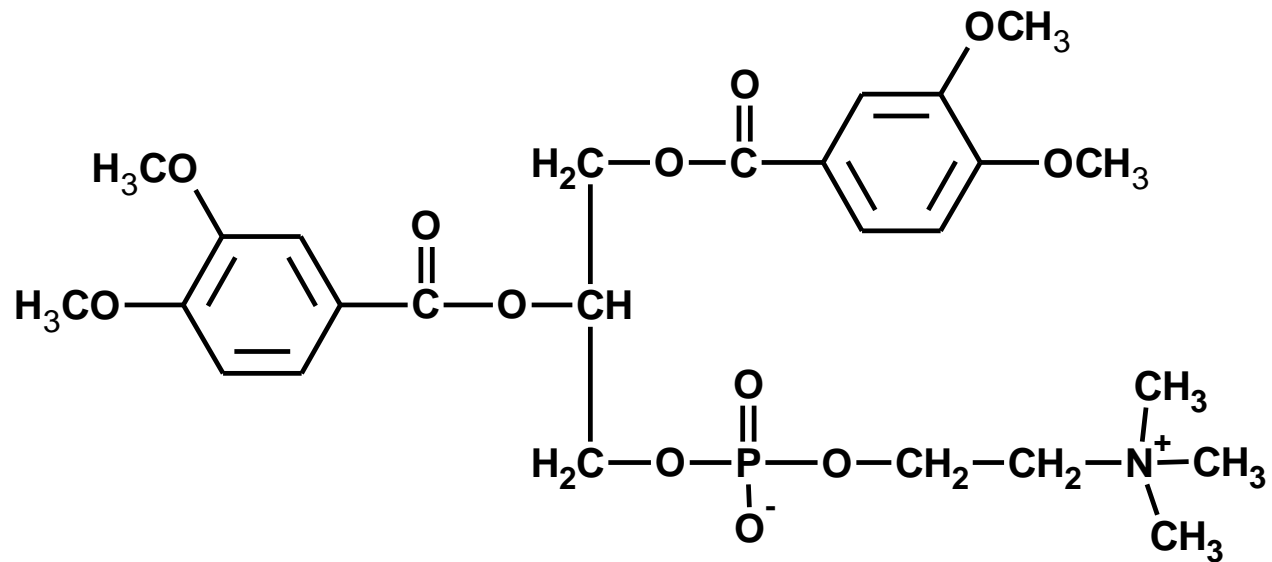

1,2-diveratroyl-*sn*-glycero-3-phosphocholine (3b)

Figure S6:  $^1\text{H}$  NMR spectrum of 3b.

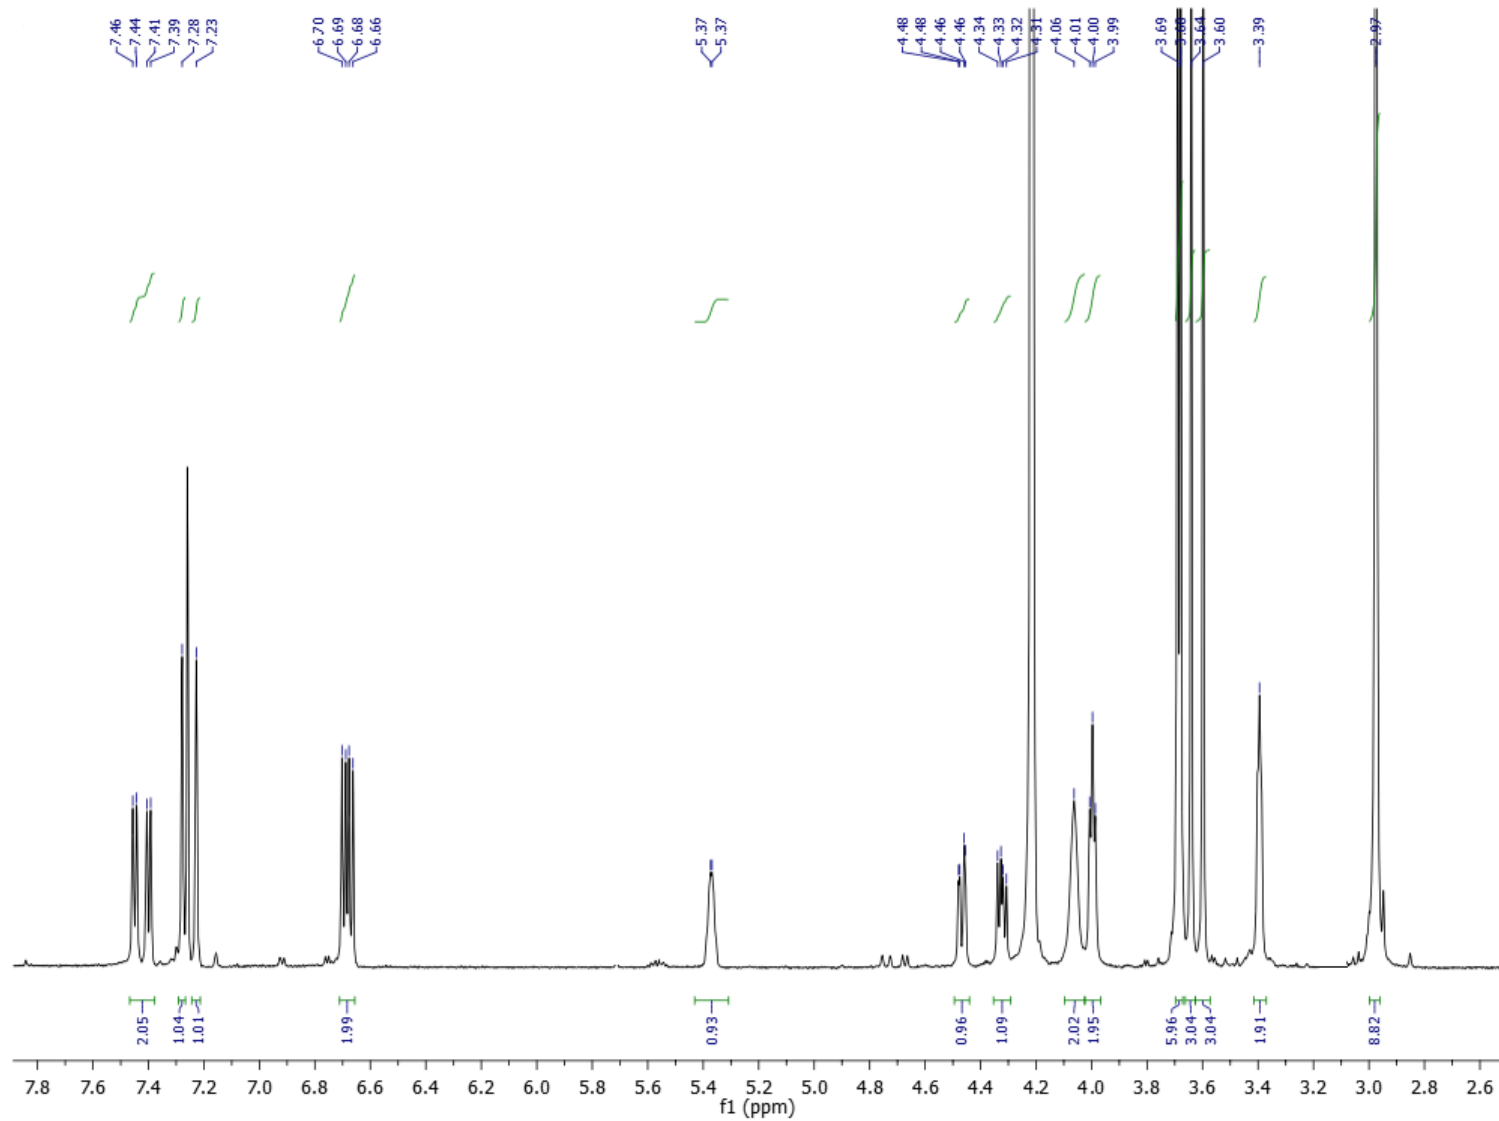

Figure S7:  $^{13}\text{C}$  NMR spectrum of 3b.

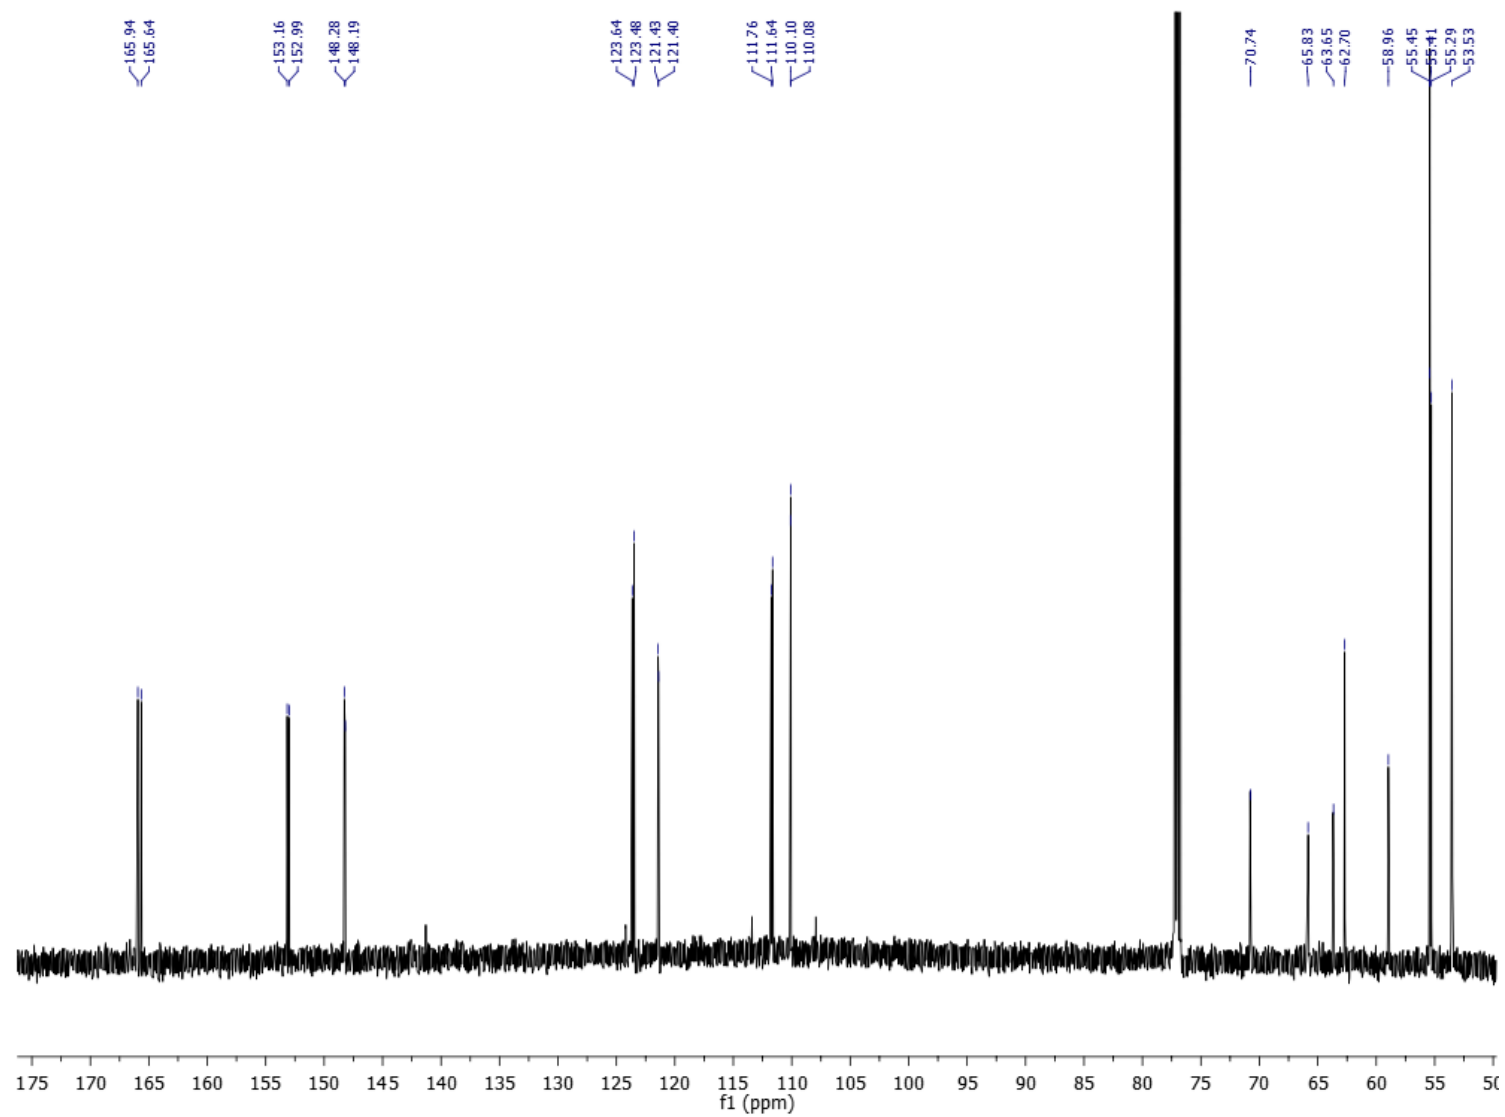

Figure S8:  $^{31}\text{P}$  NMR spectrum of 3b.

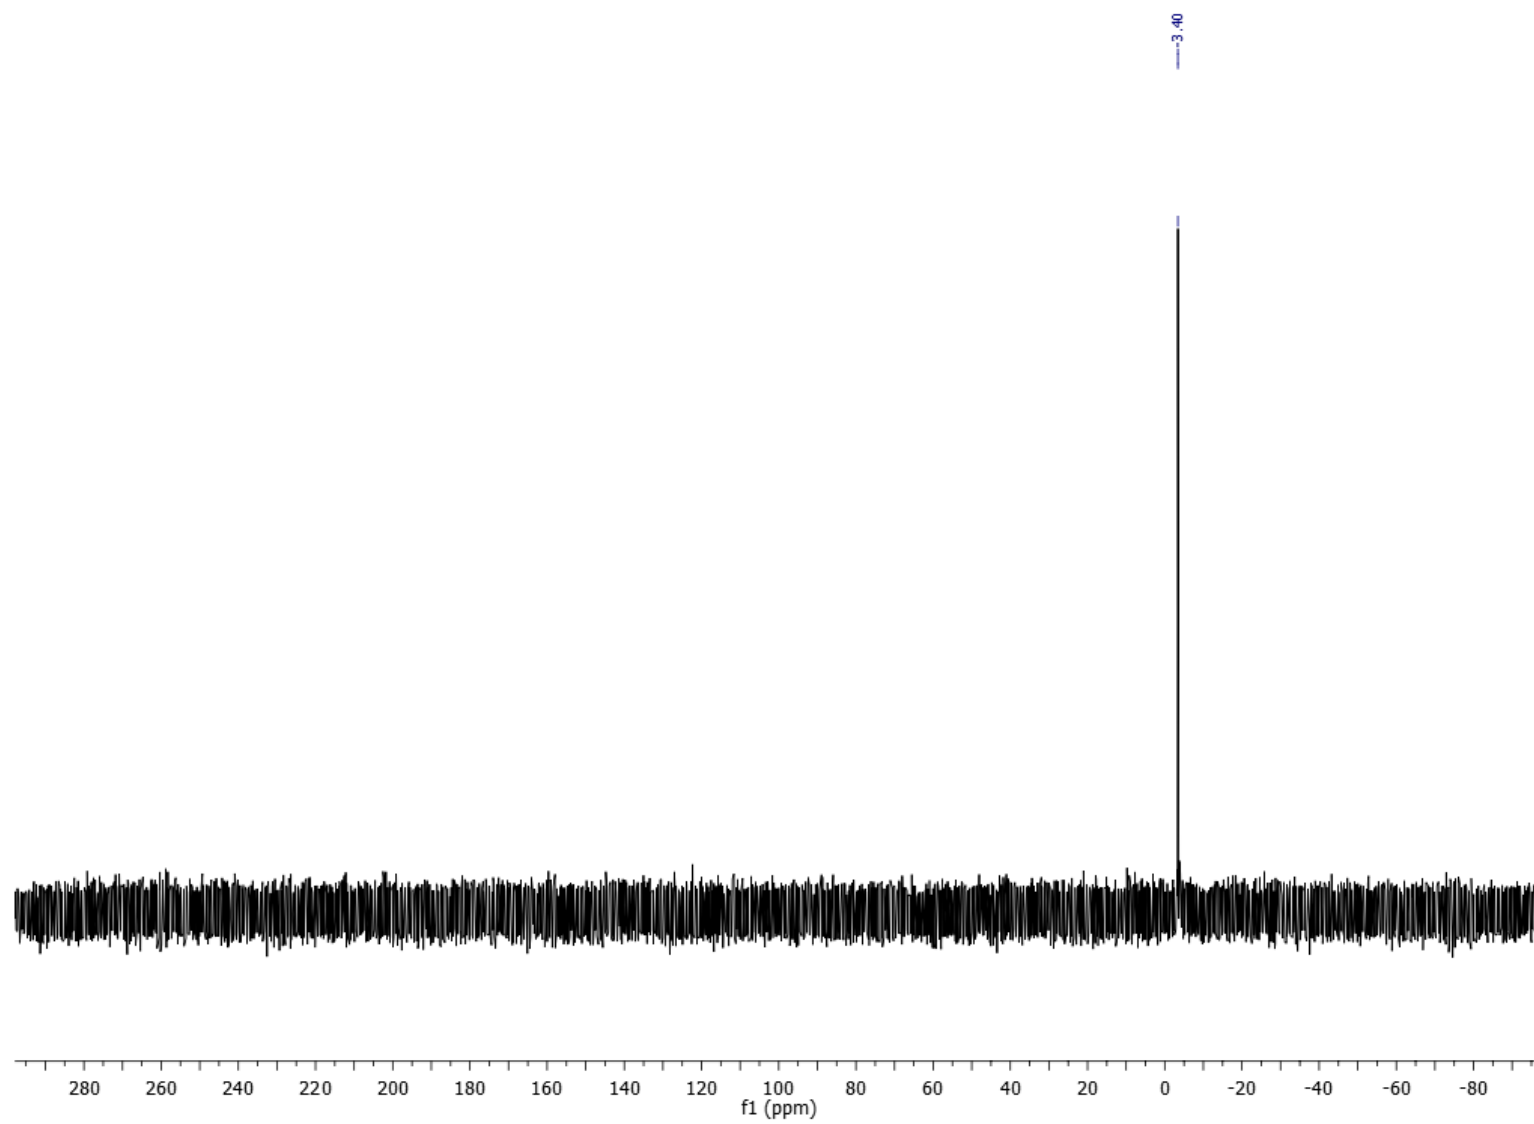

Figure S9:  $^1\text{H} - ^1\text{H}$  COSY spectrum of 3b.

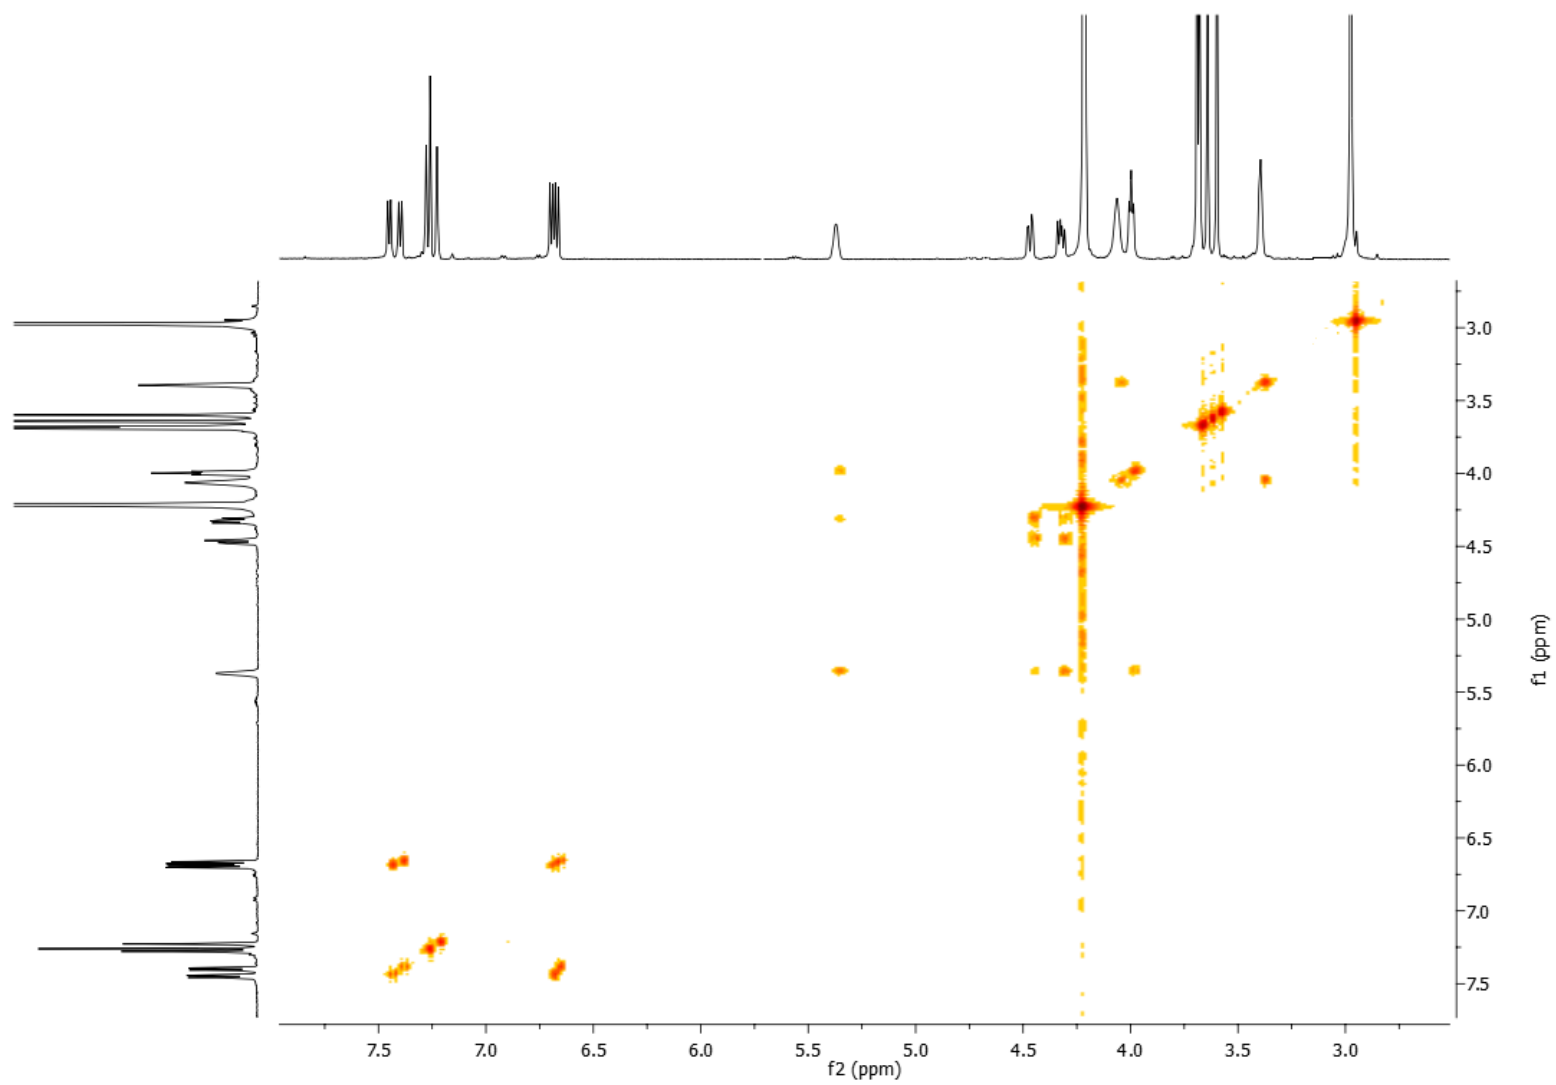

Figure S10: HSQC spectrum of 3b.

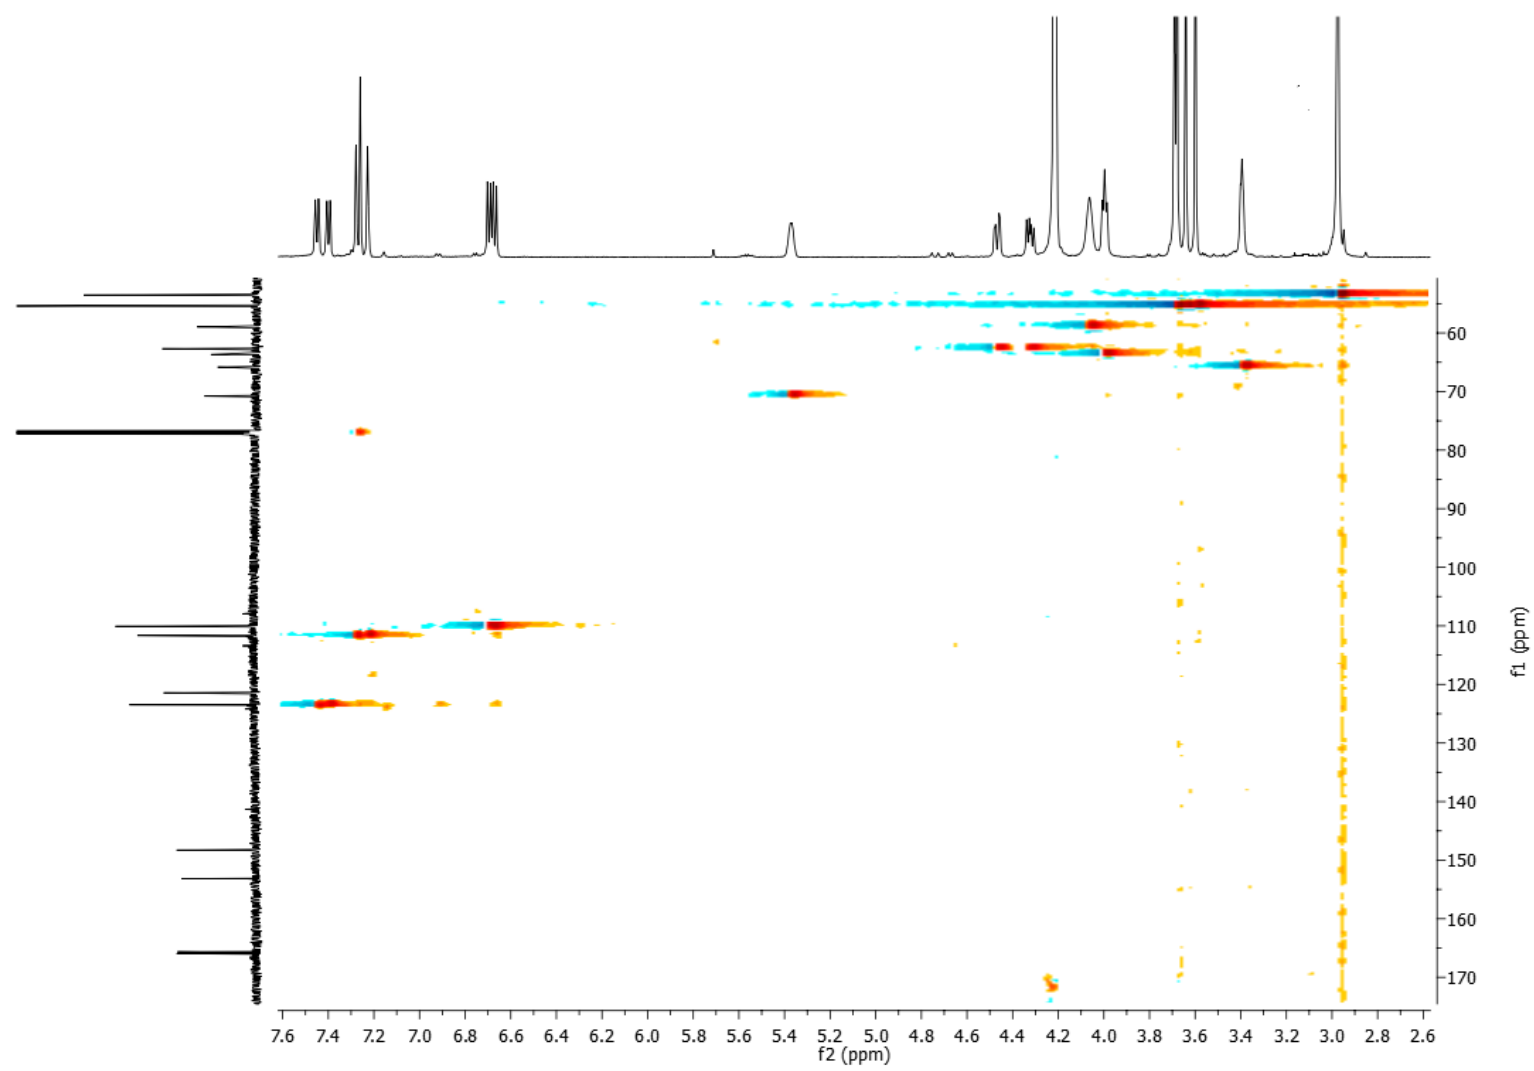

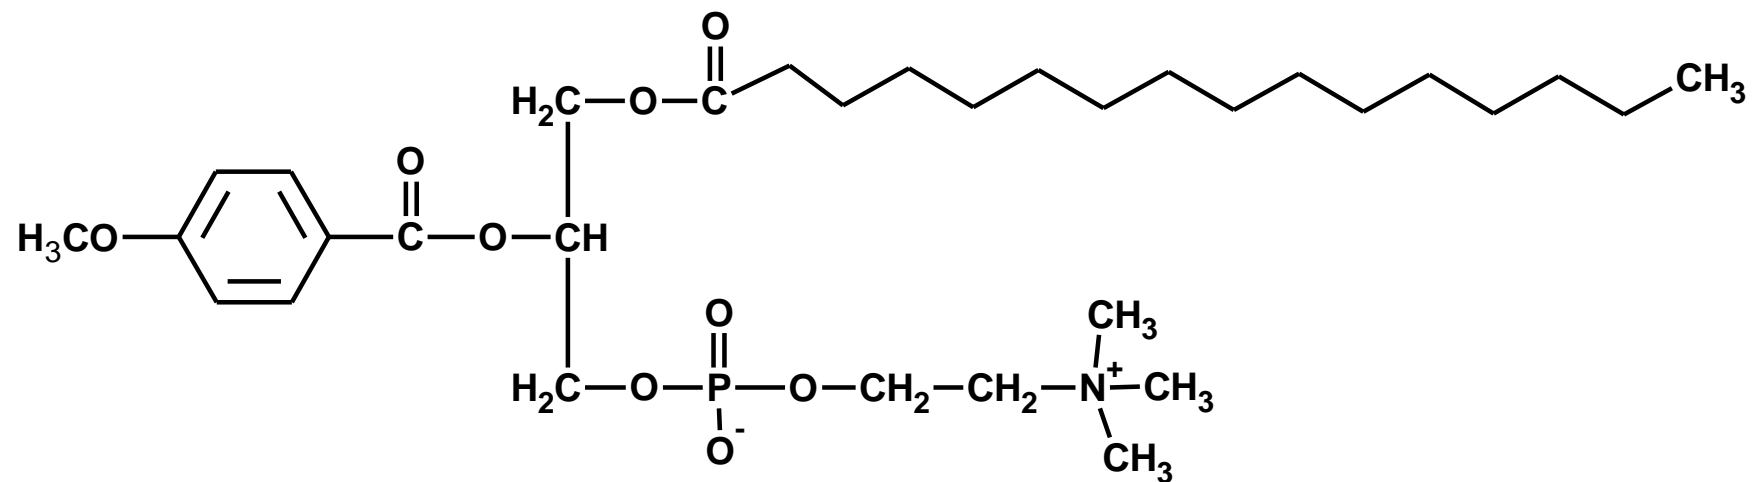

1-palmitoyl-2-anisoyl-*sn*-glycero-3-phosphocholine (5a)

Figure S11:  $^1\text{H}$  NMR spectrum of 5a.

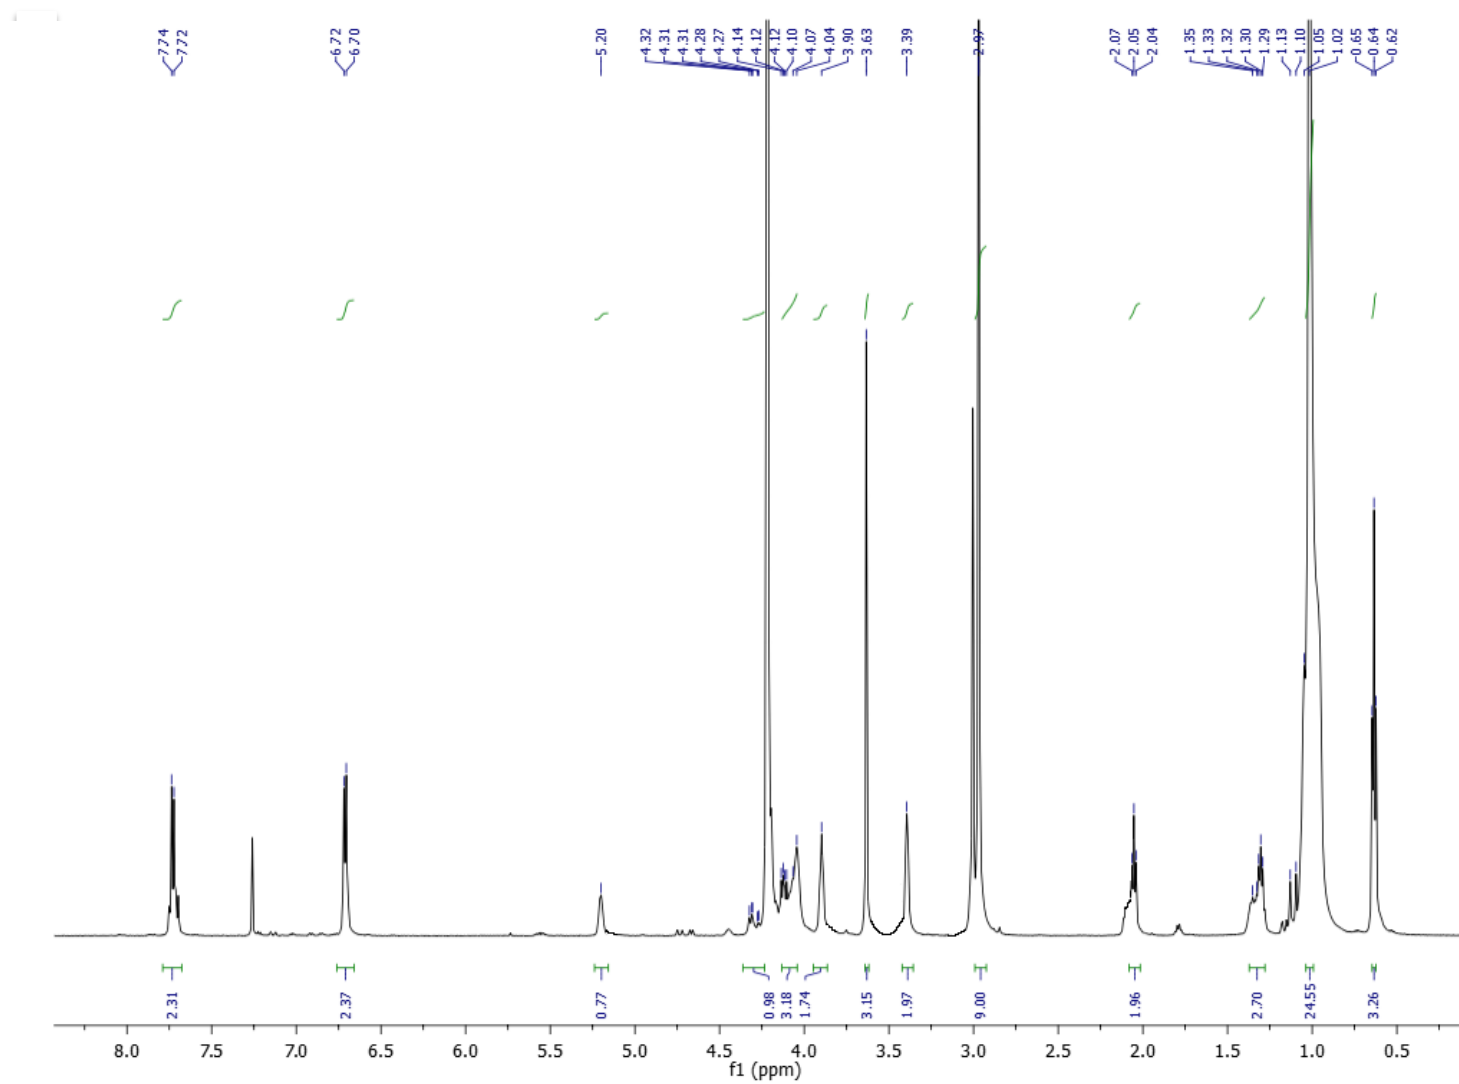



Figure S12:  $^{13}\text{C}$  NMR spectrum of 5a.

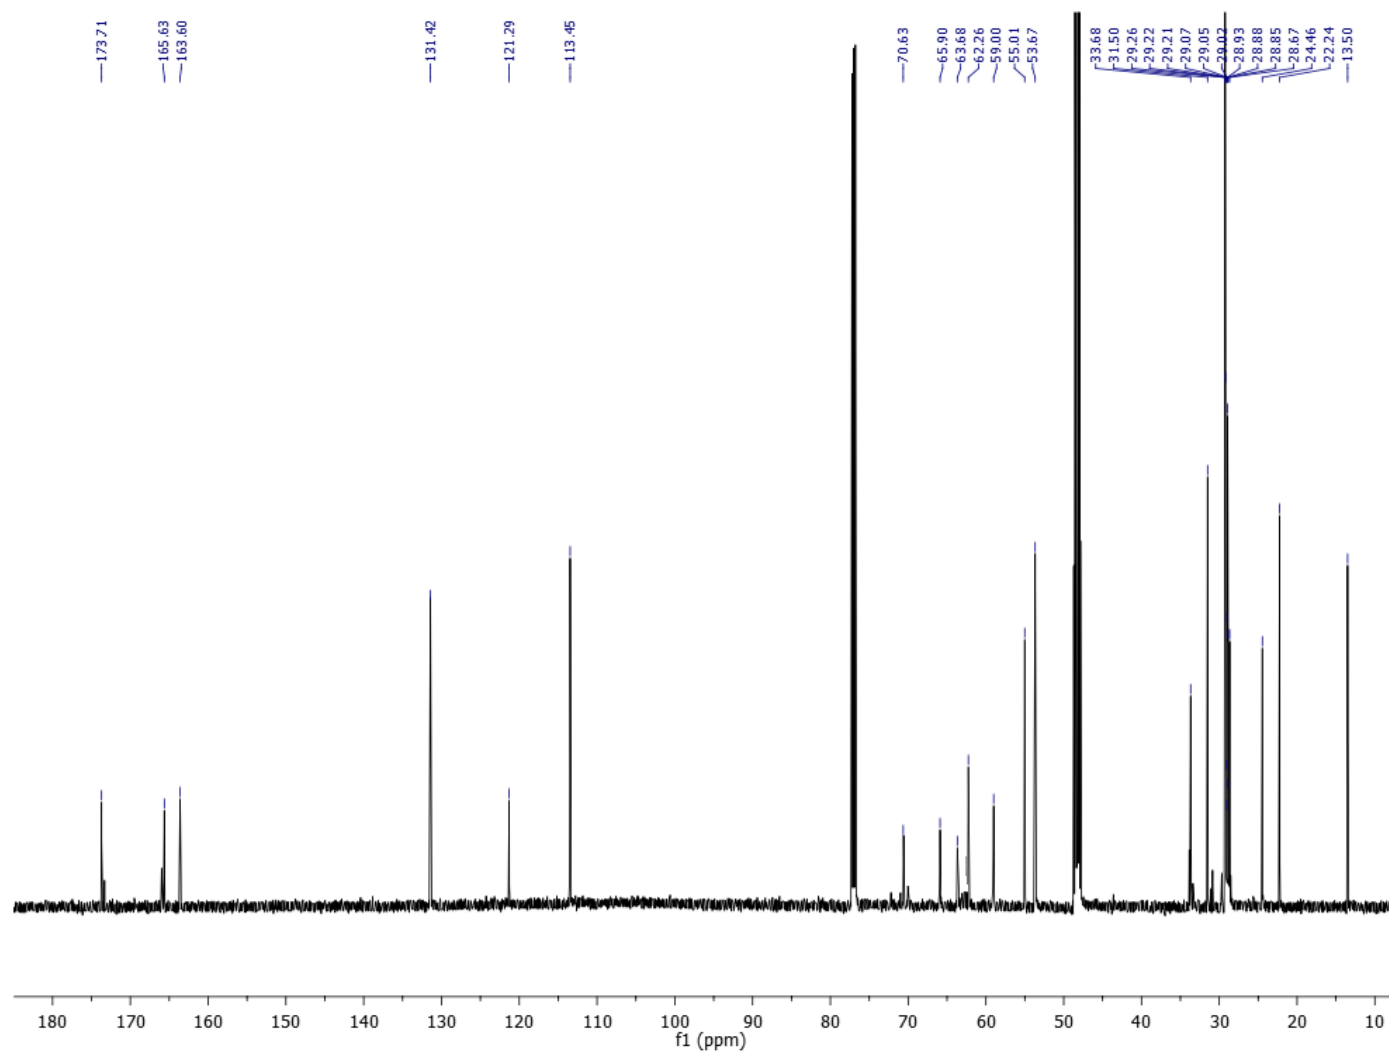

Figure S13:  $^{31}\text{P}$  NMR spectrum of 5a.

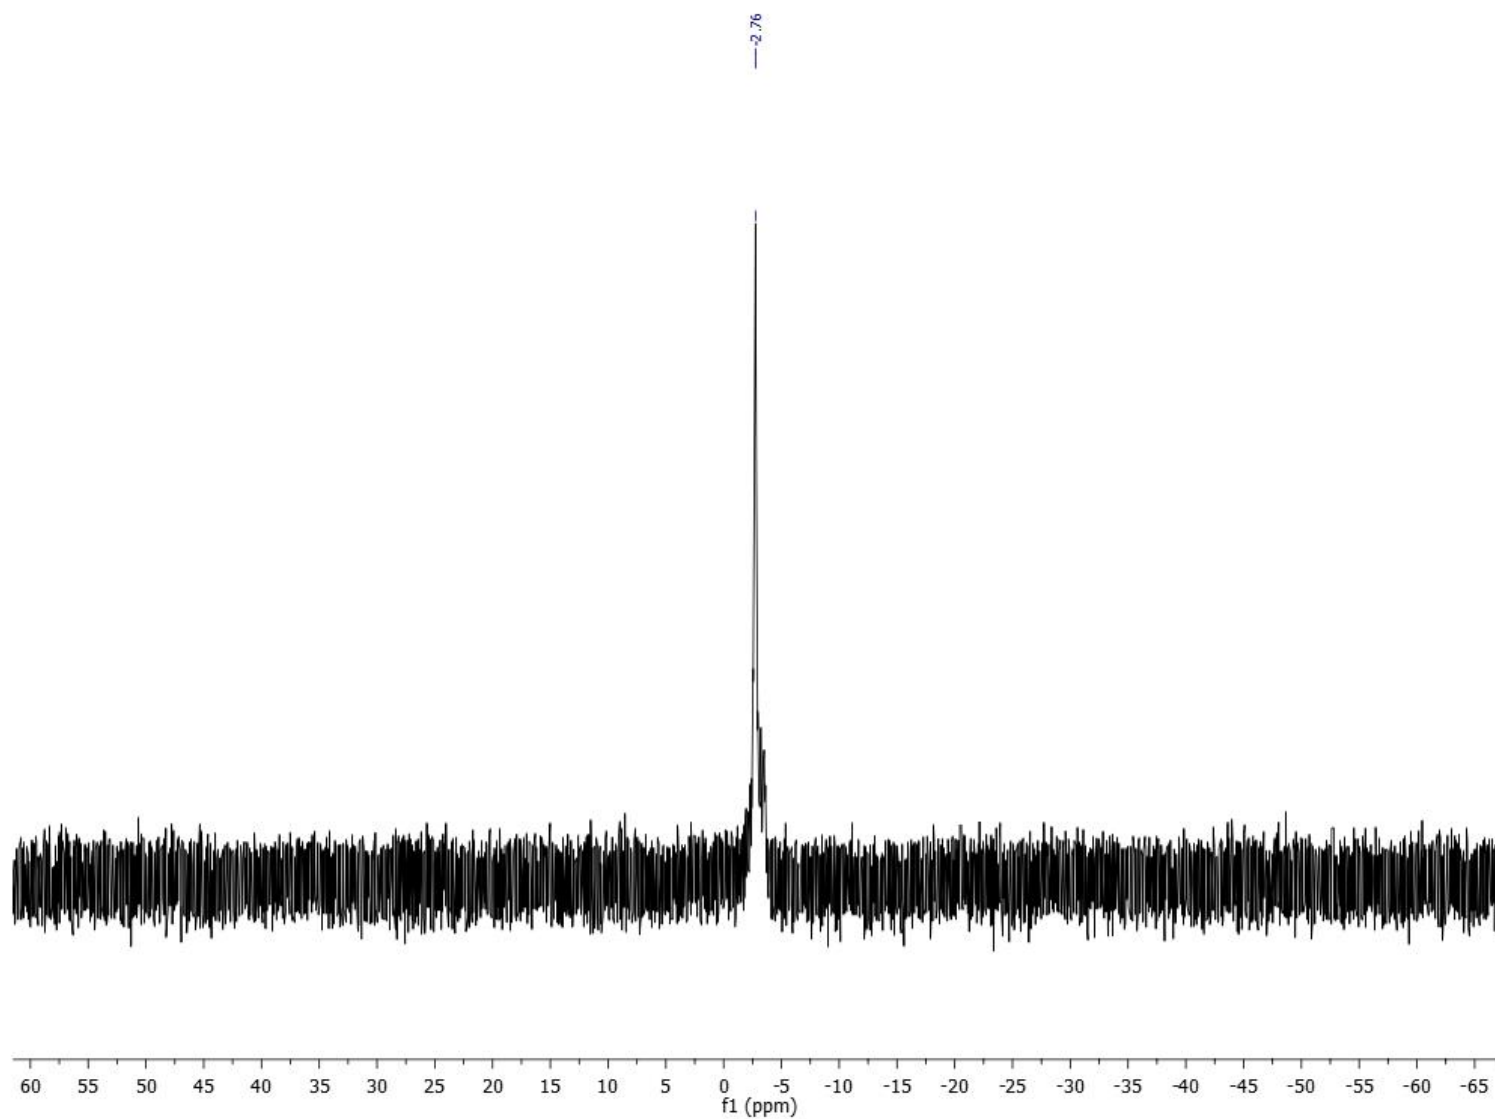

Figure S14:  $^1\text{H} - ^1\text{H}$  COSY spectrum of 5a.

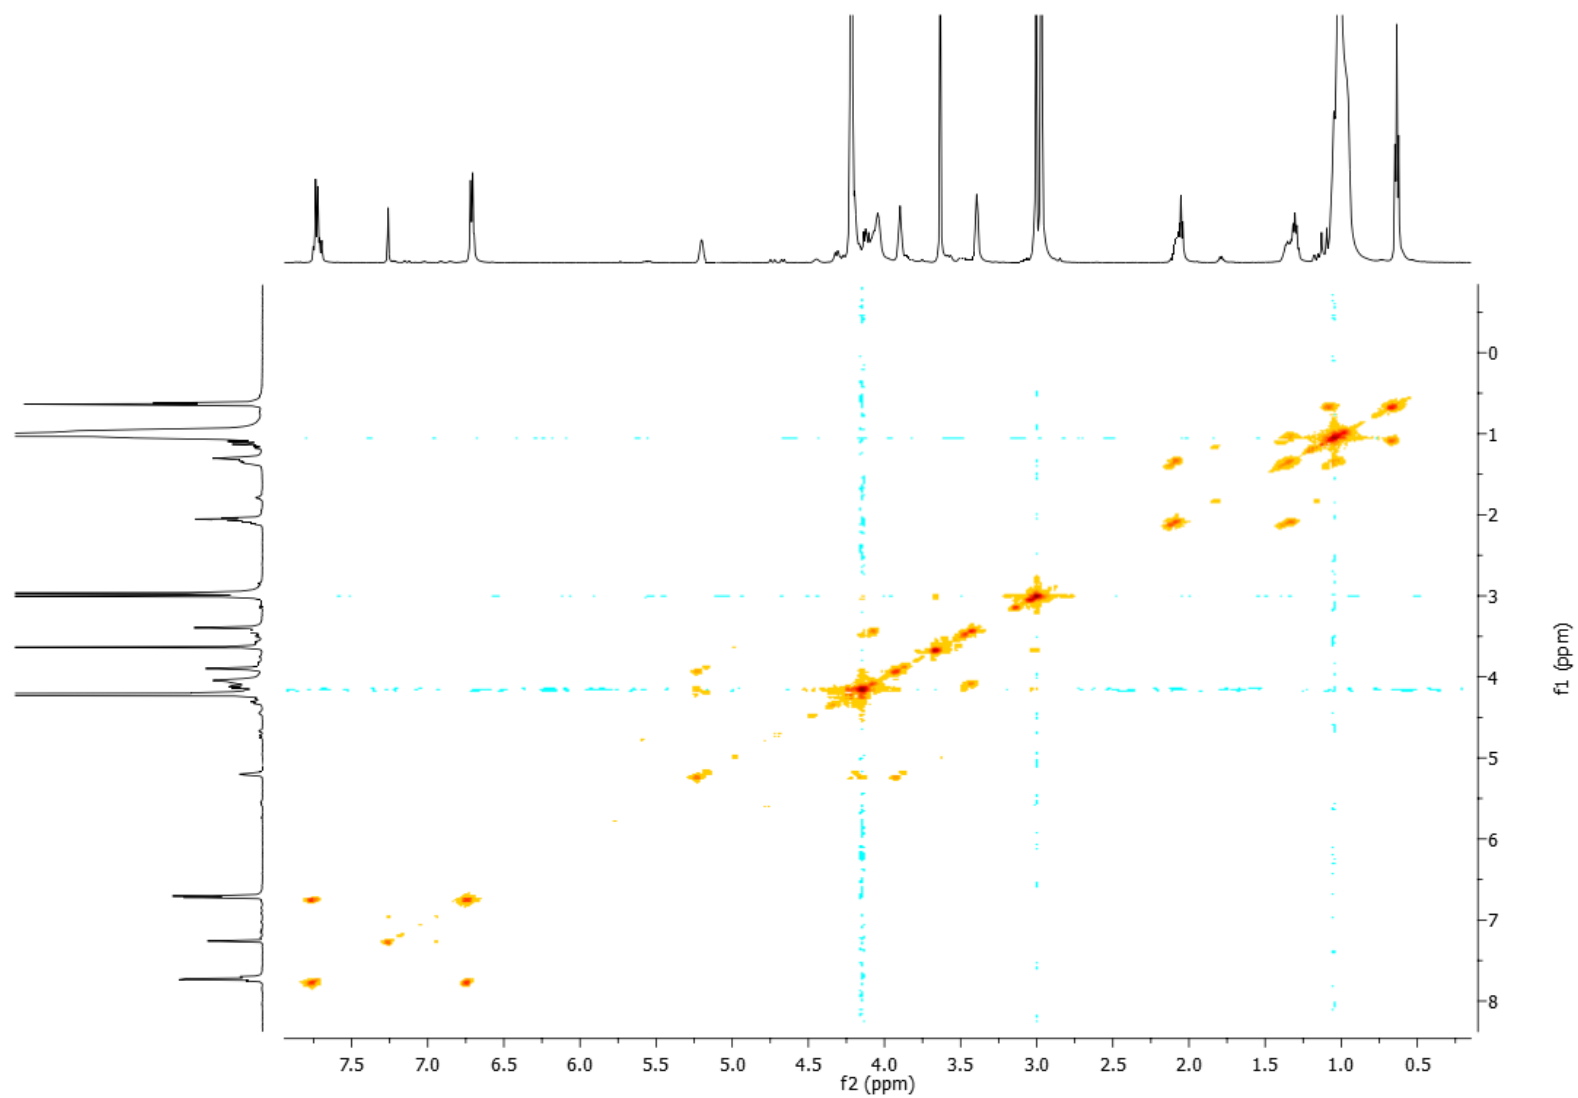

Figure S15: HSQC spectrum of 5a.

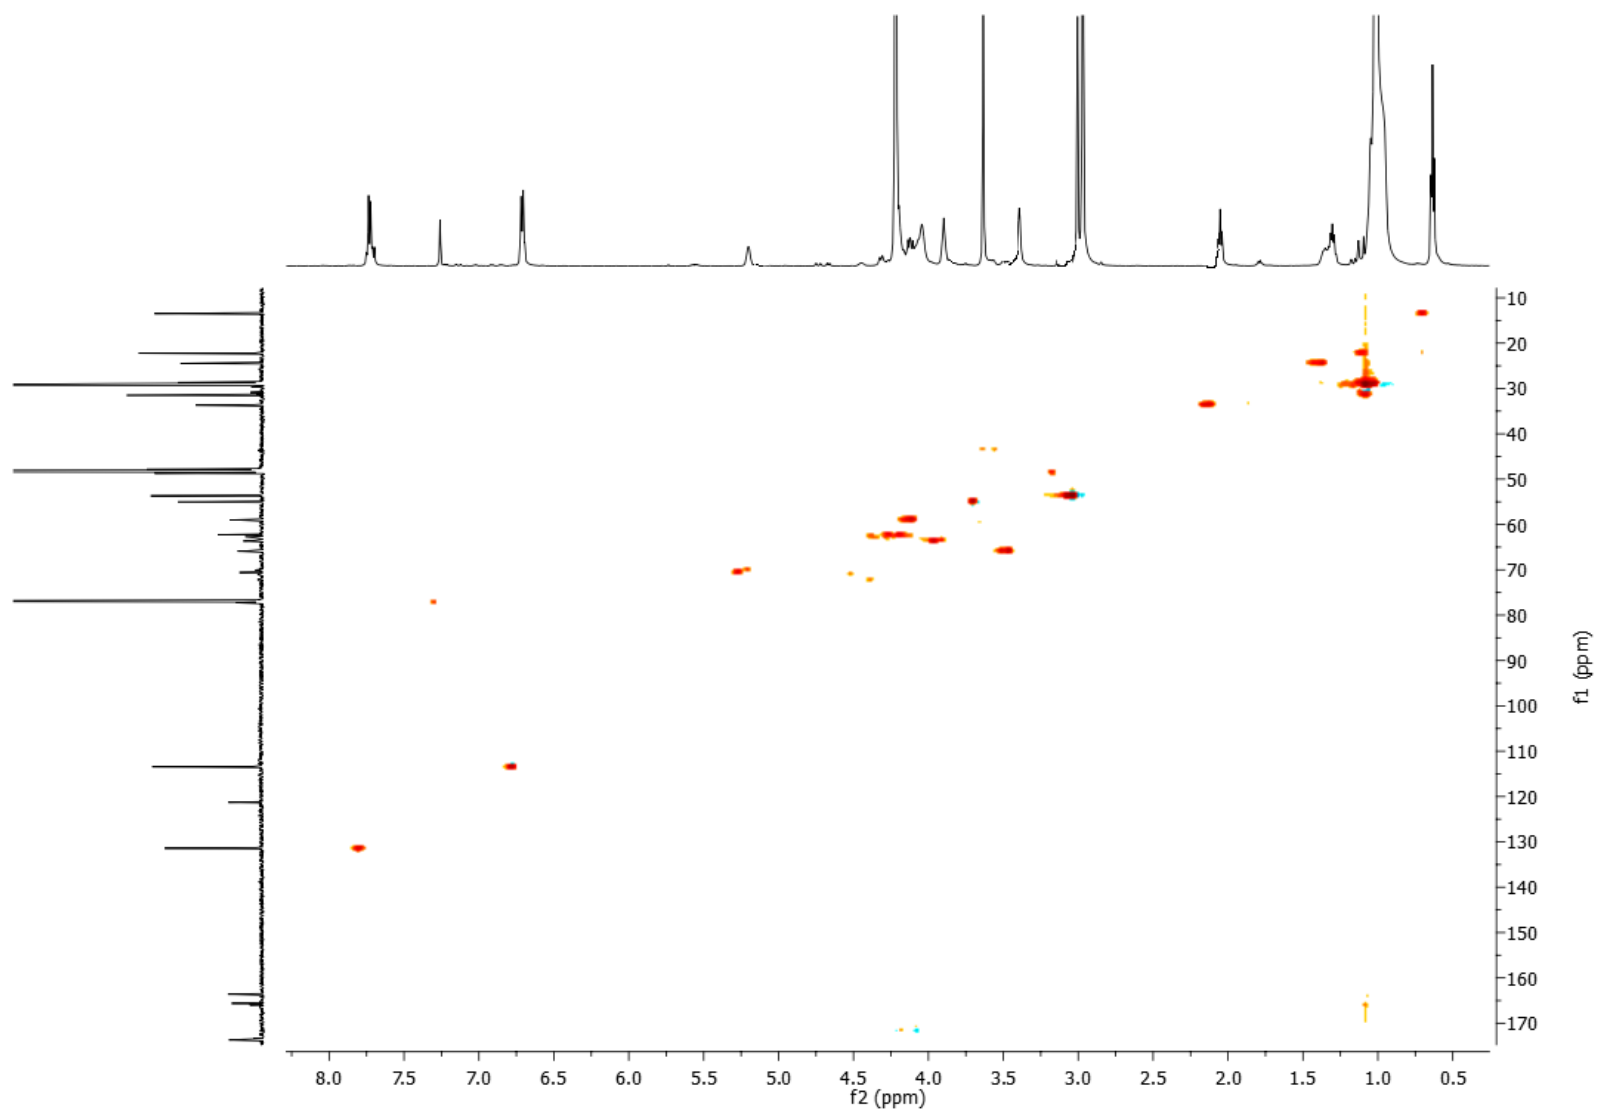

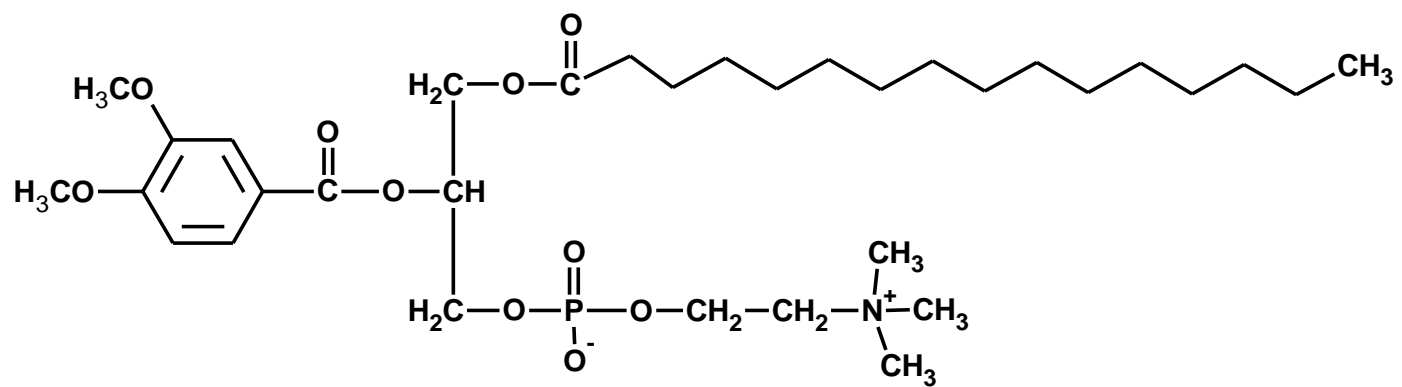

1-palmitoyl-2-veratroyl-*sn*-glycero-3-phosphocholine (**5b**)

Figure S16: <sup>1</sup>H NMR spectrum of 5b.

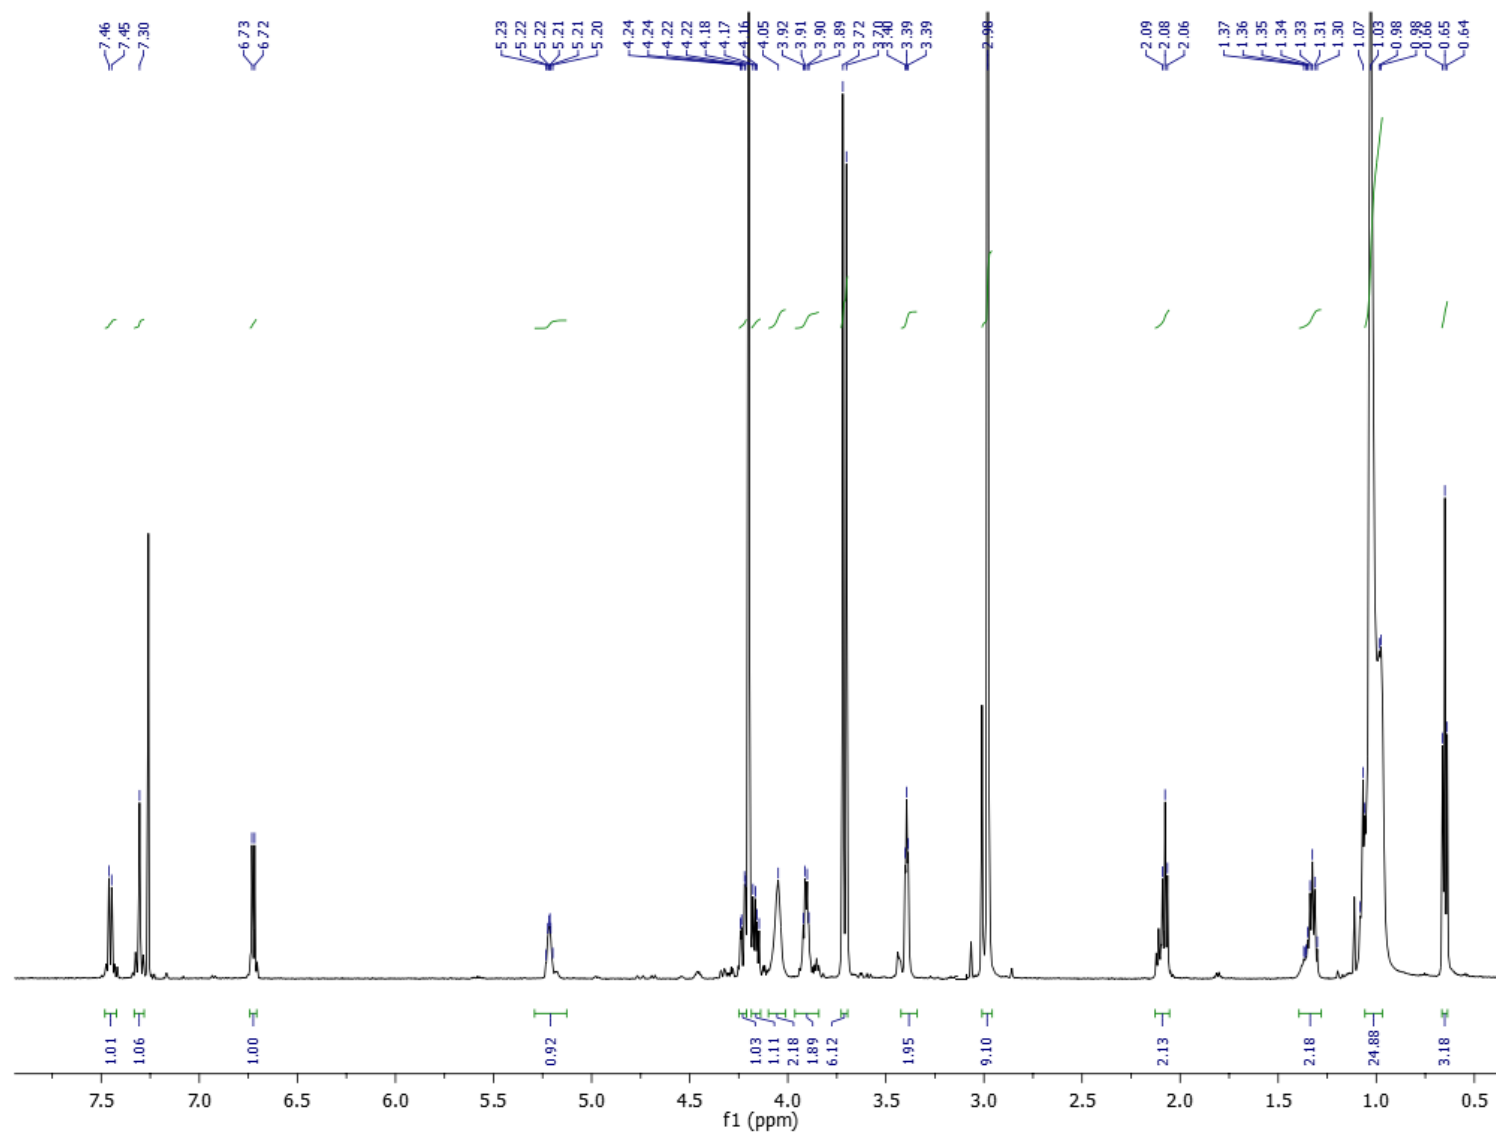

Figure S17:  $^{13}\text{C}$  NMR spectrum of 5b.

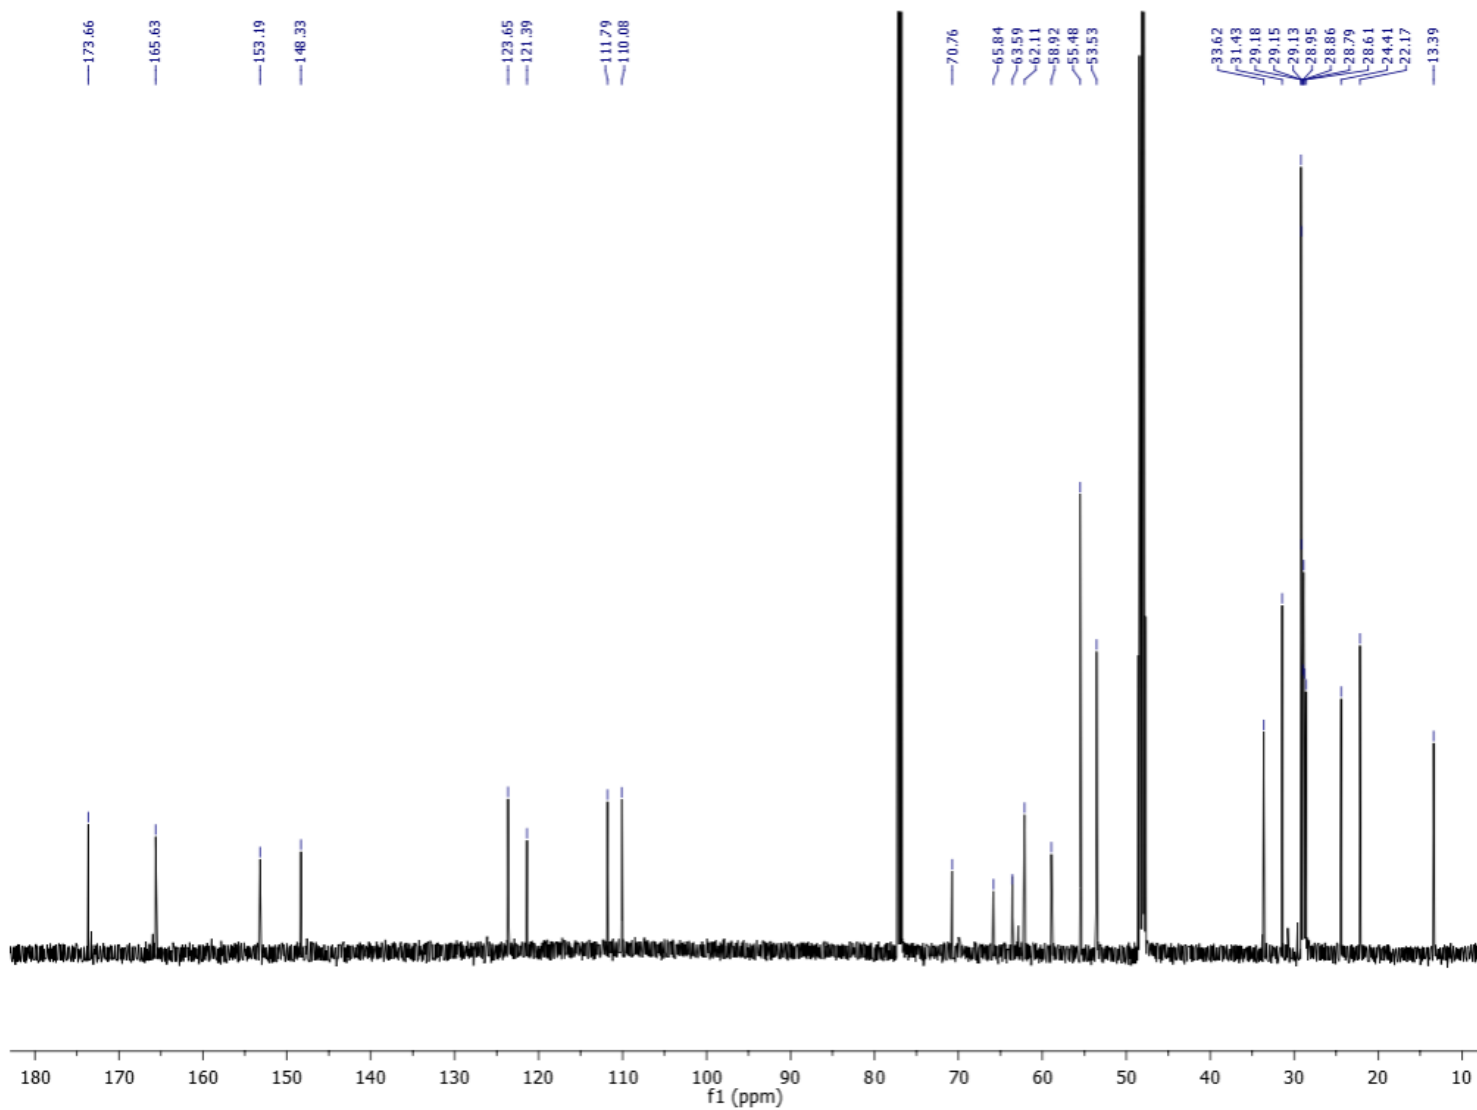

Figure S18:  $^{31}\text{P}$  NMR spectrum of 5b.

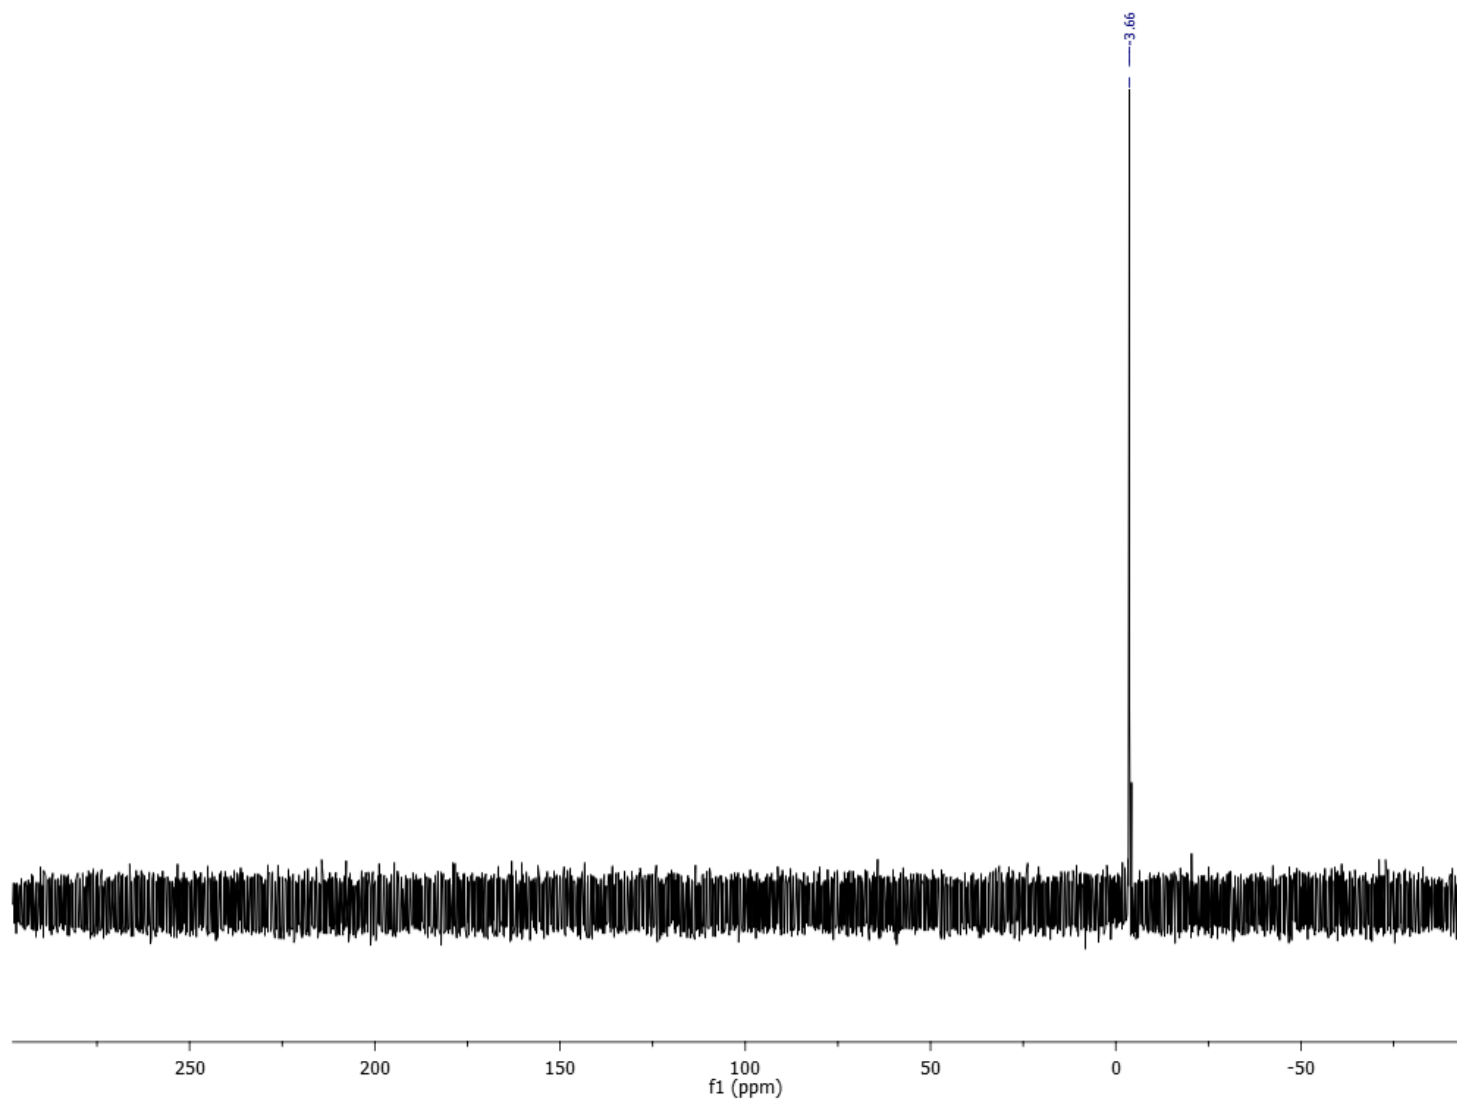



Figure S19:  $^1\text{H} - ^1\text{H}$  COSY spectrum of 5b.

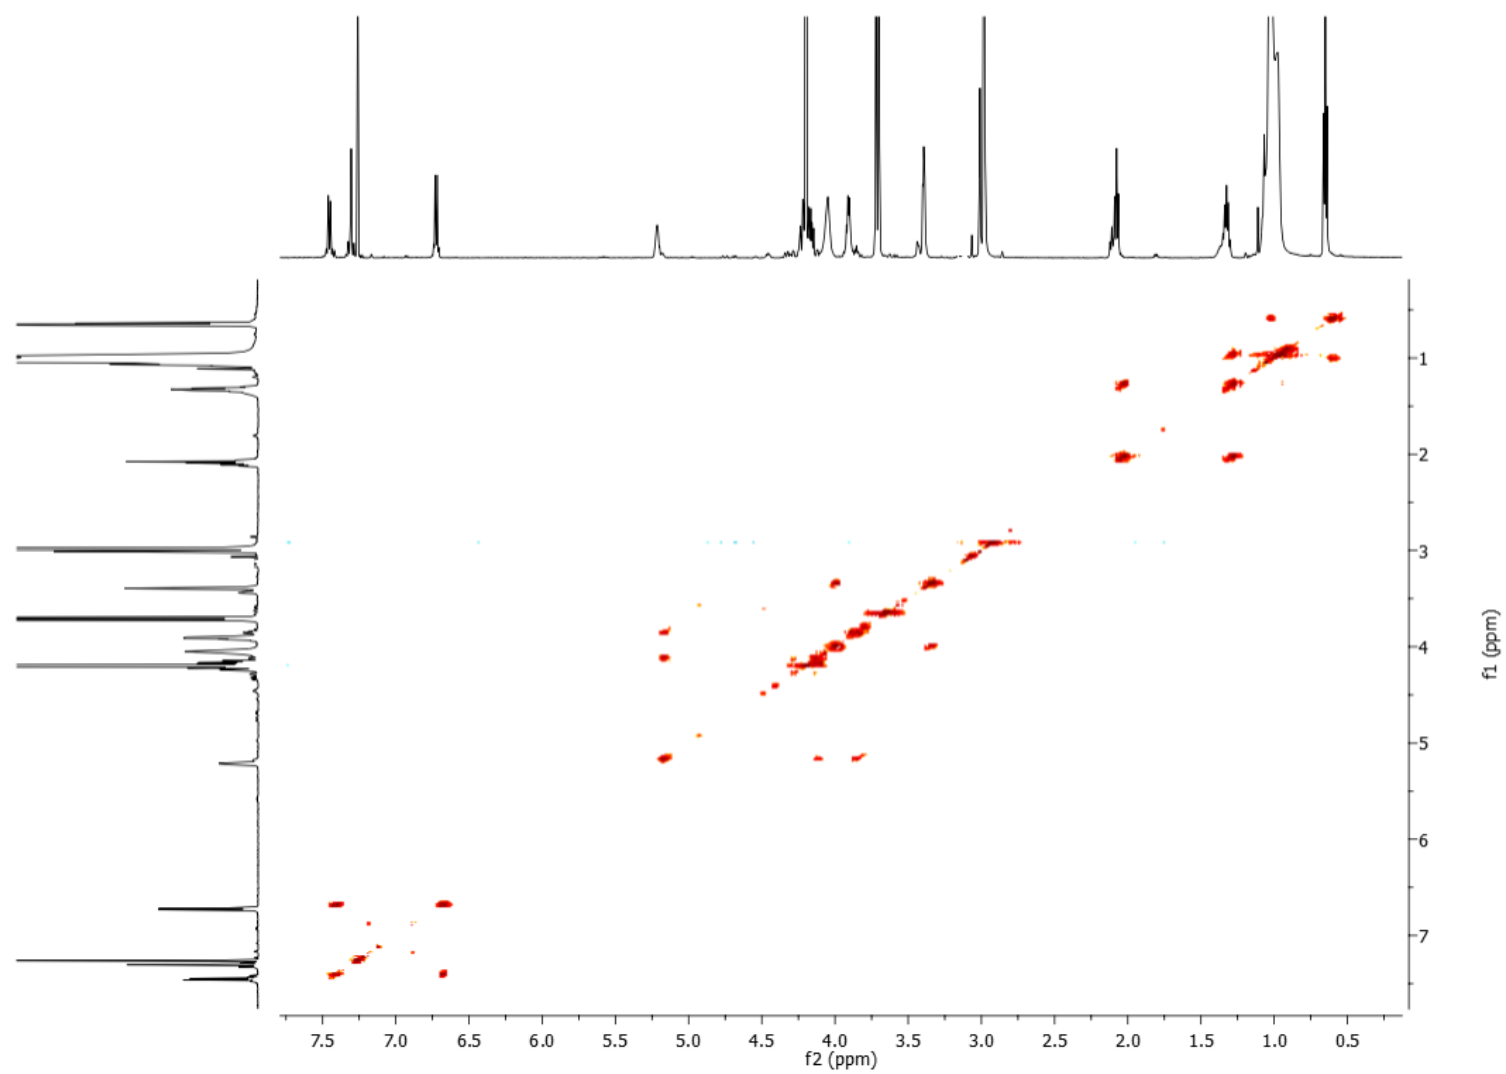

Figure S20: HSQC spectrum of 5b.

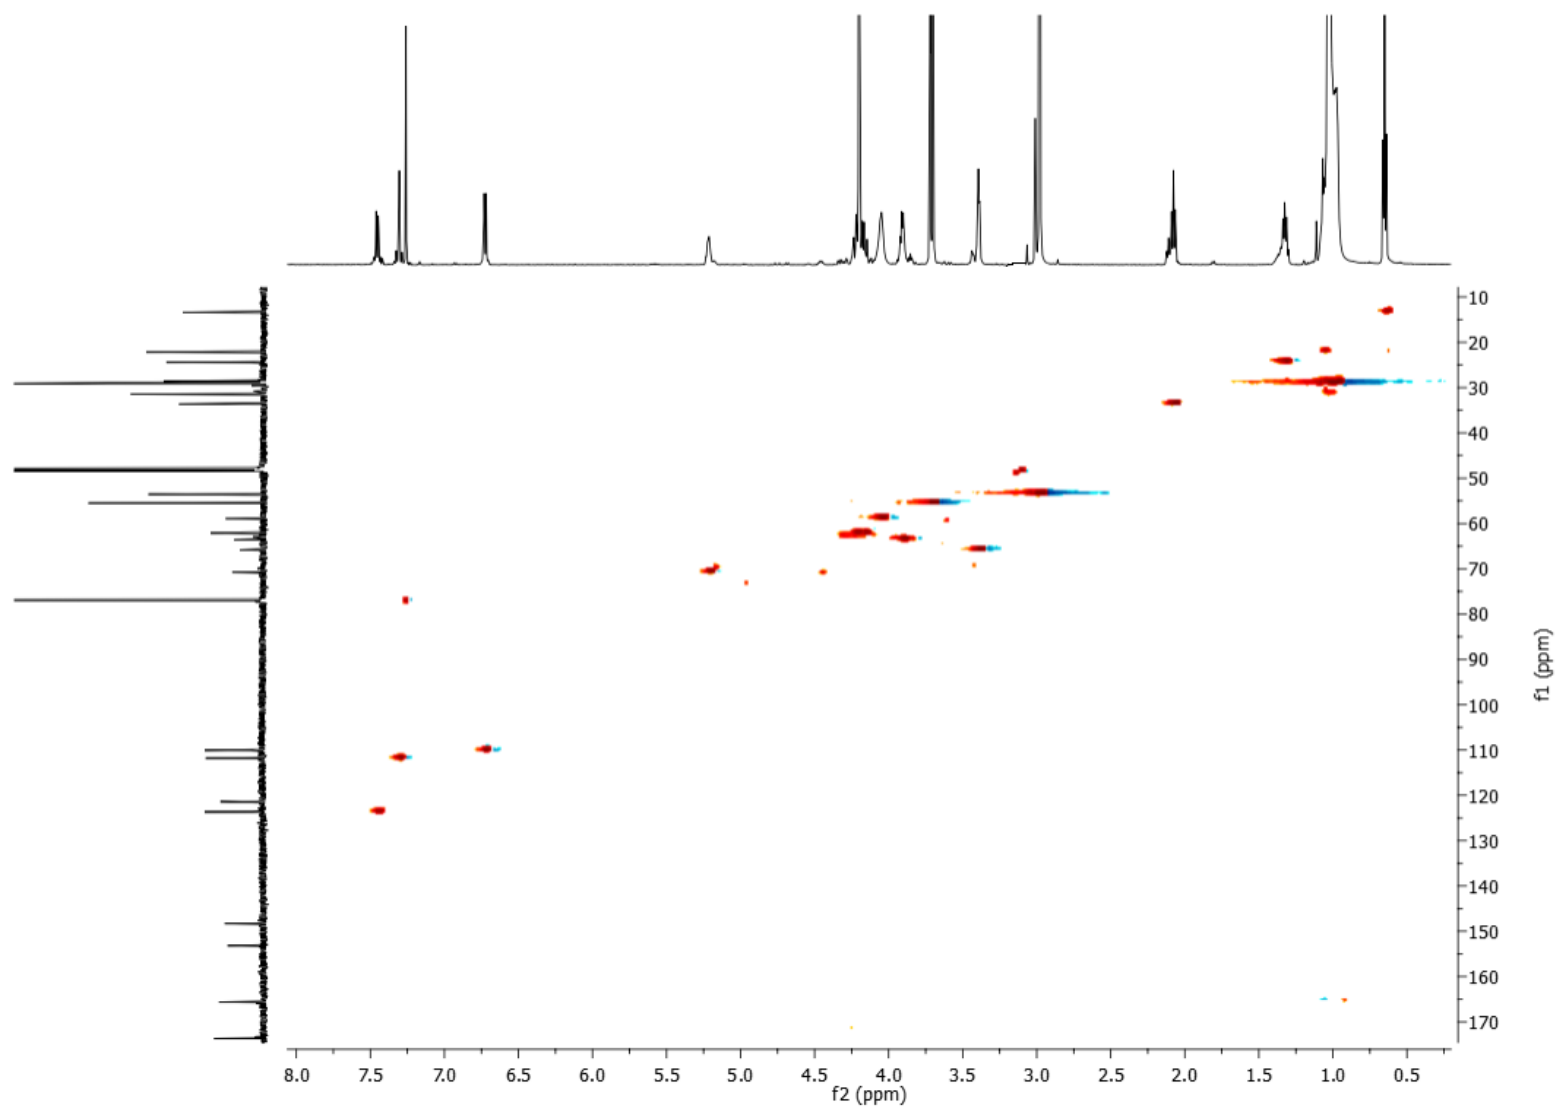

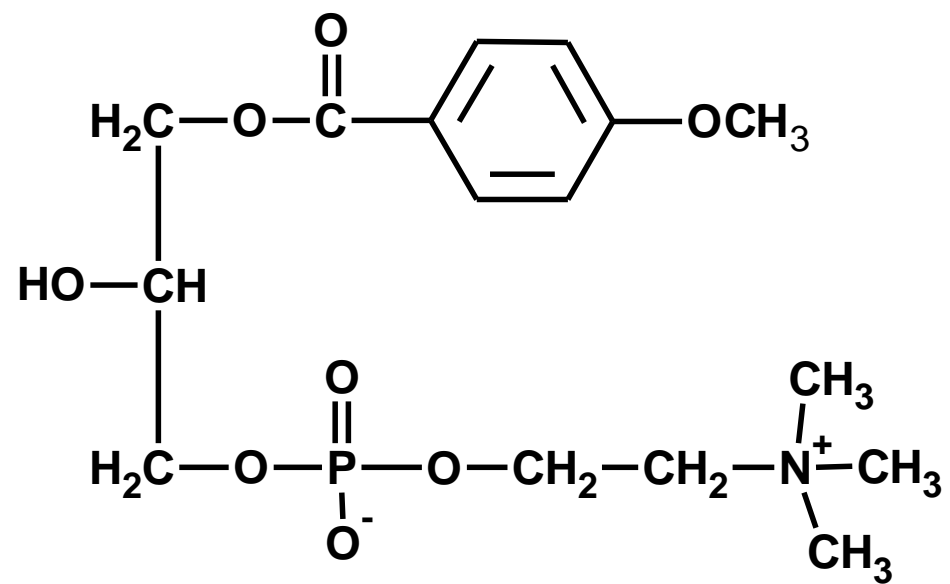

1-anisoyl-2-hydroxy-*sn*-glycero-3-phosphocholine (7a)

Figure S21:  $^1\text{H}$  NMR spectrum of 7a.

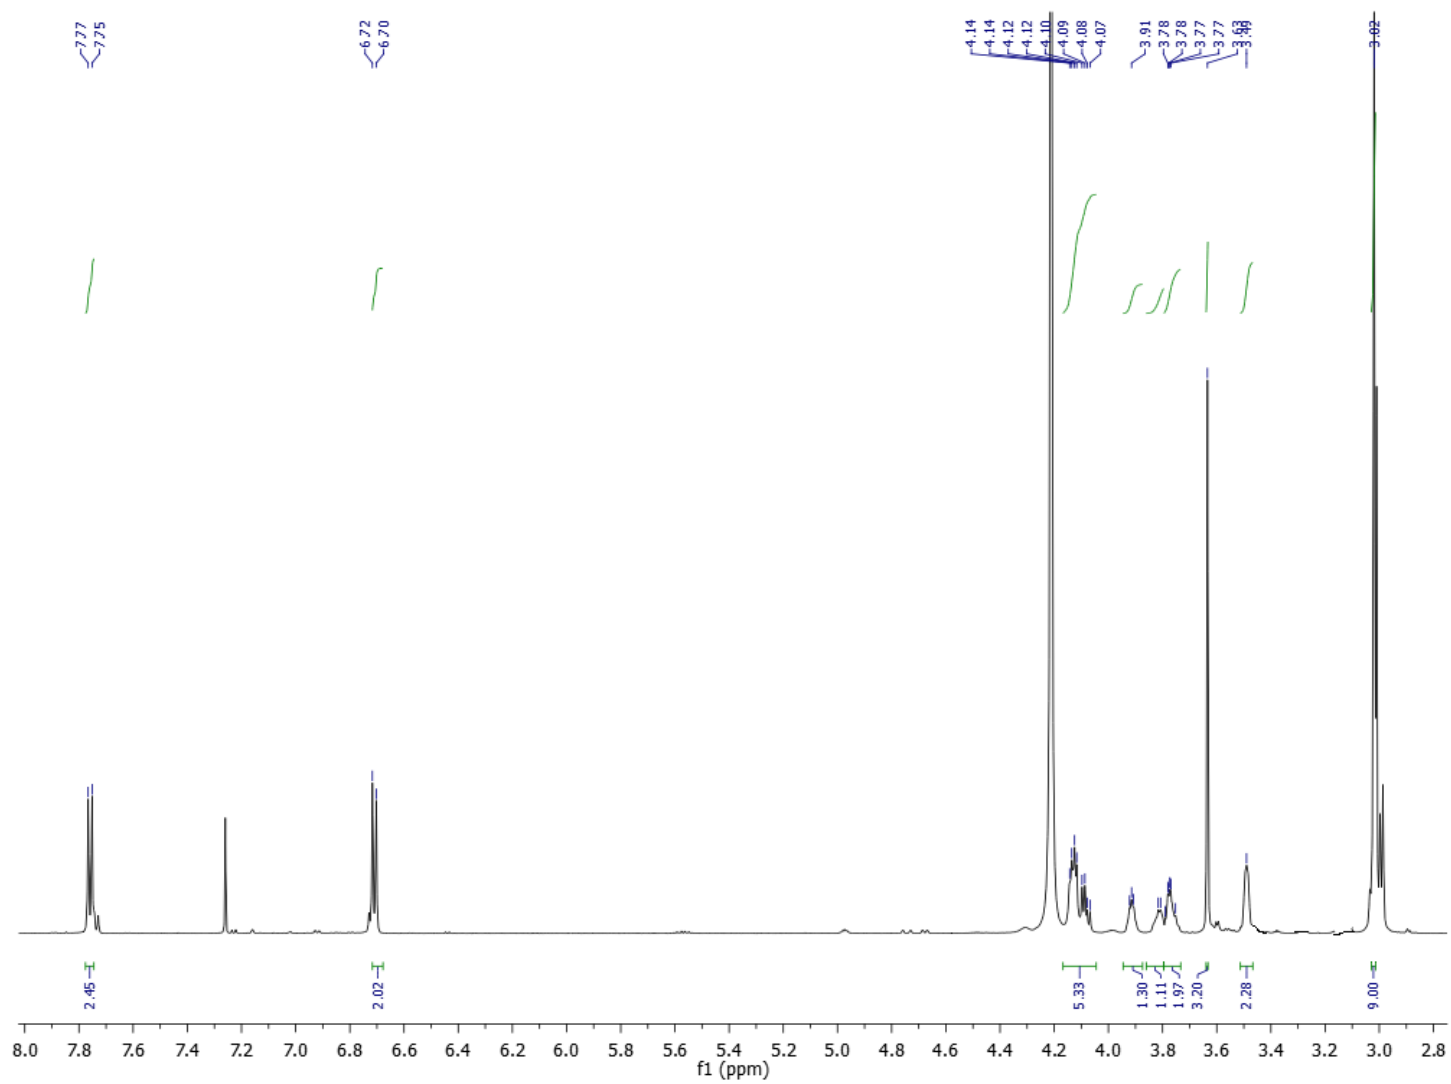

Figure S22:  $^{13}\text{C}$  NMR spectrum of 7a.

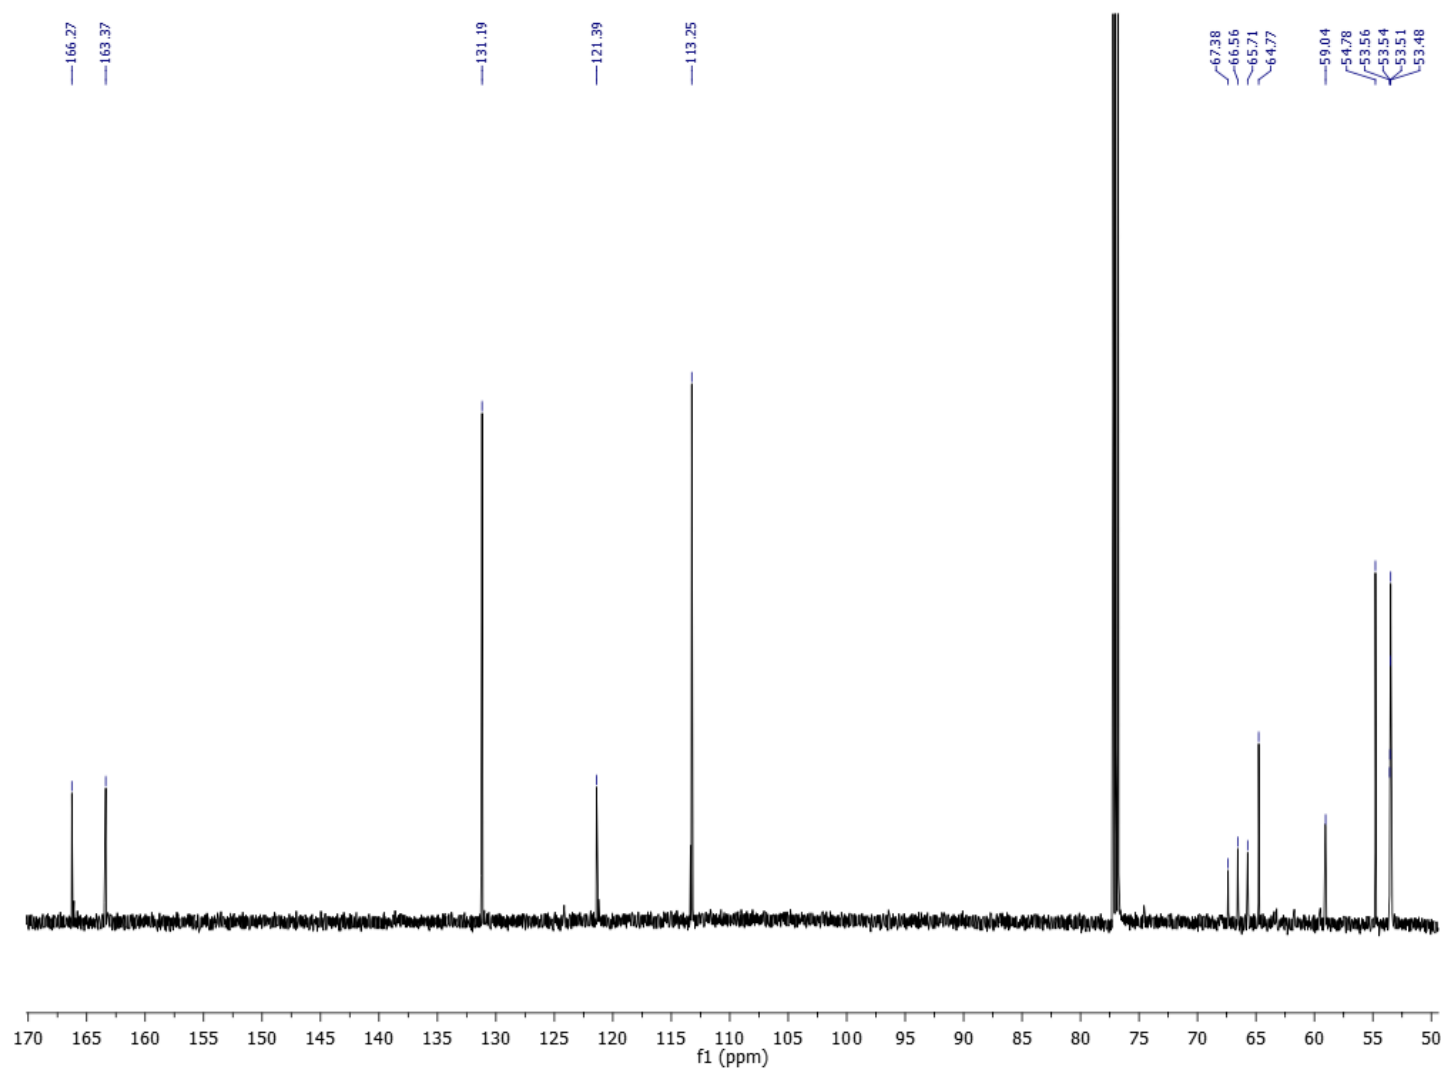

Figure S23:  $^{31}\text{P}$  NMR spectrum of 7a.

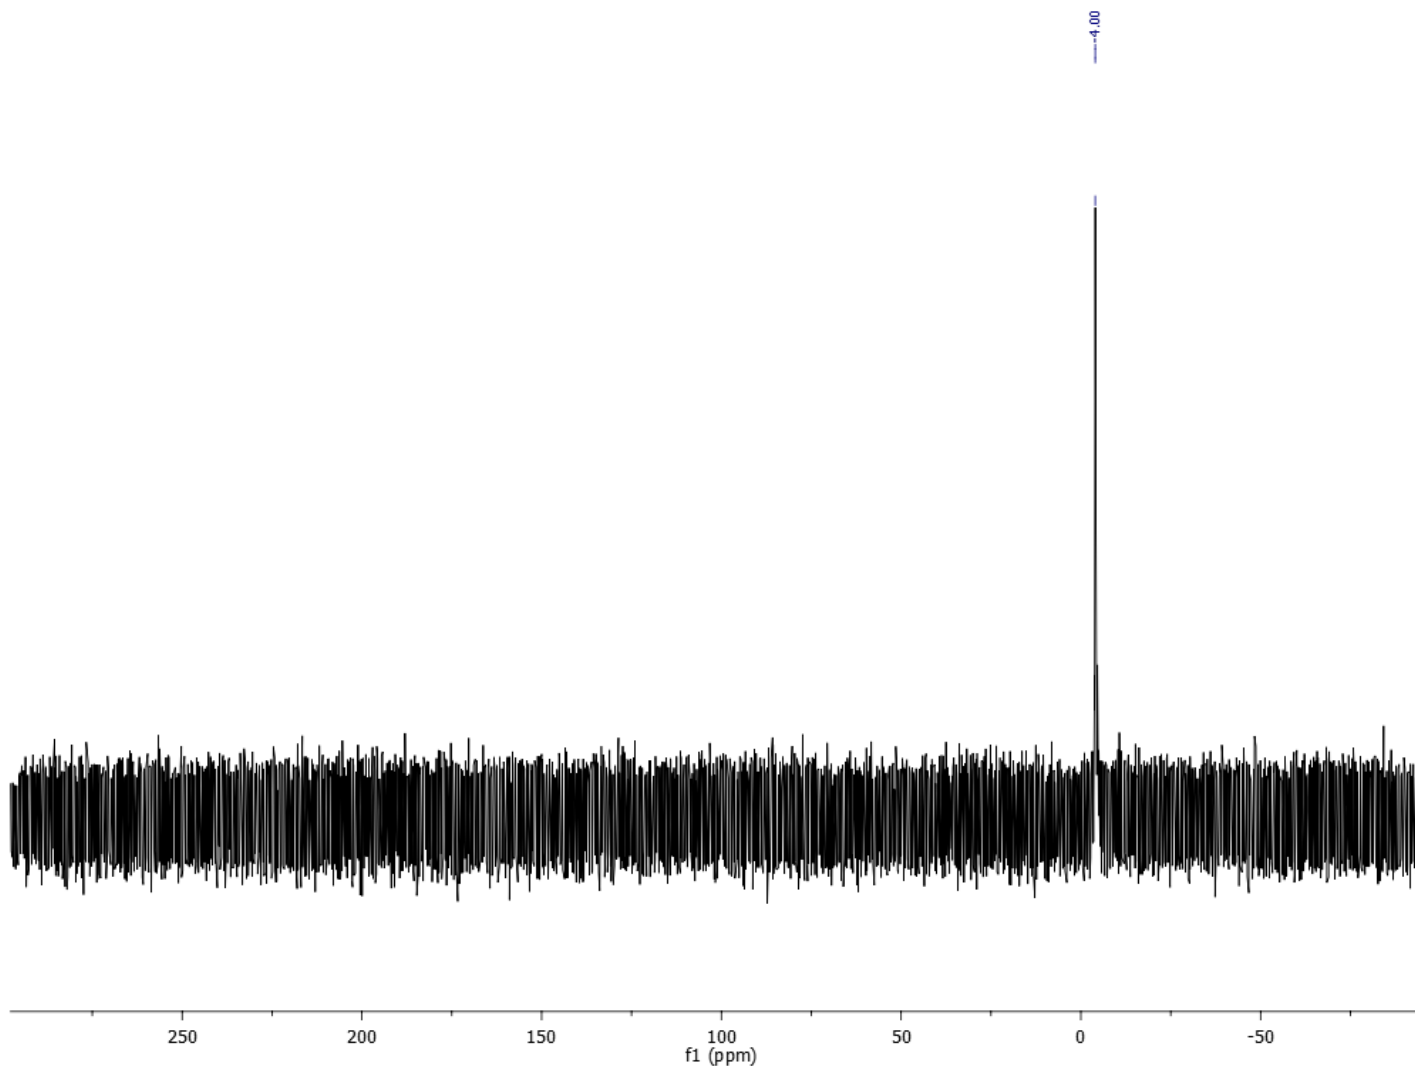

Figure S24:  $^1\text{H} - ^1\text{H}$  COSY spectrum of 7a.

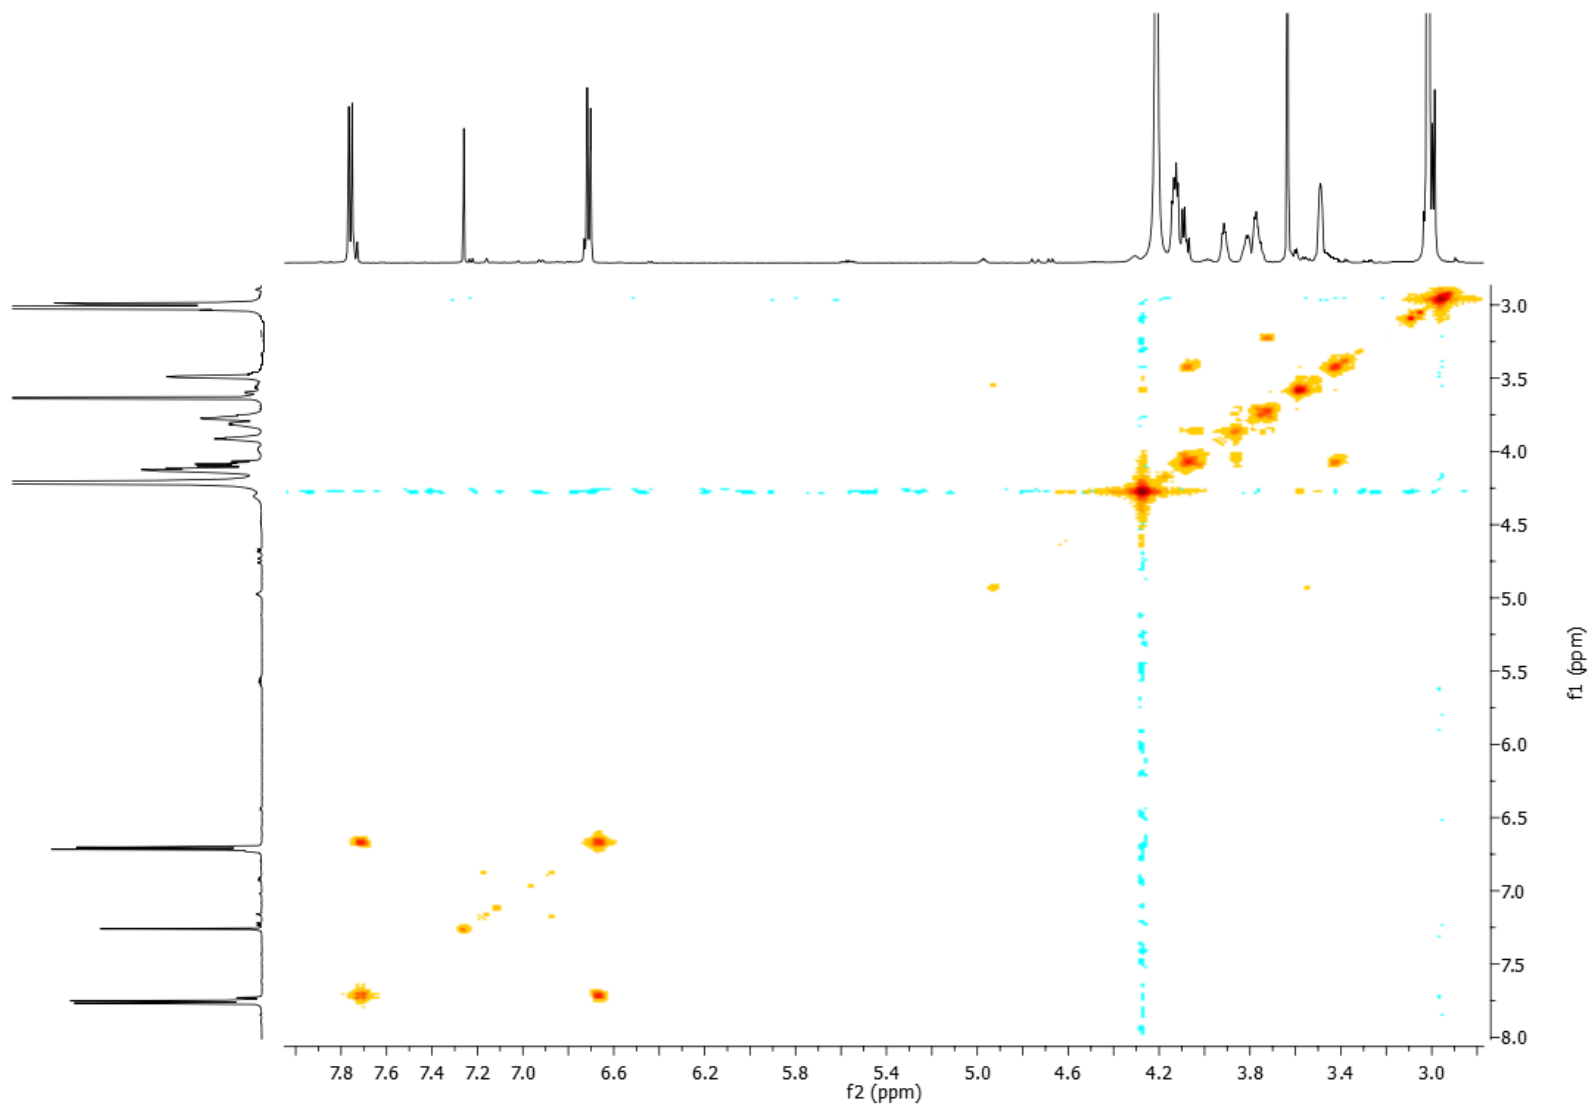

Figure S25: HSQC spectrum of 7a.

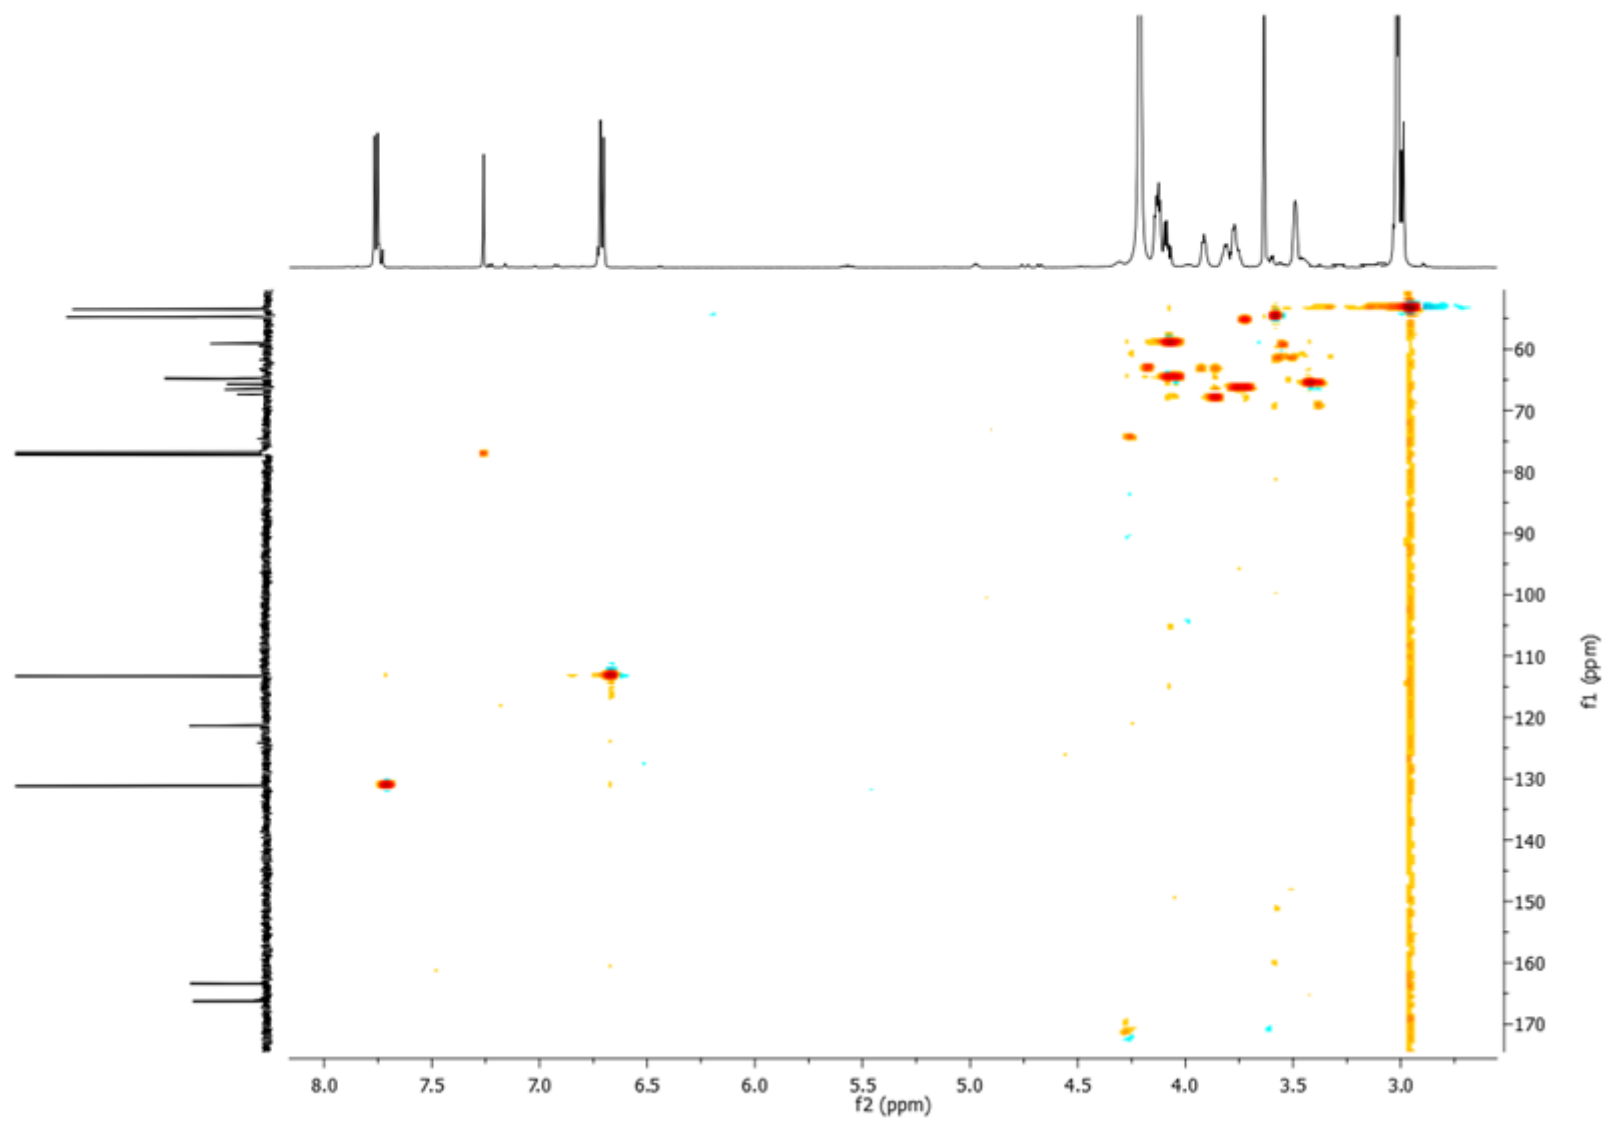



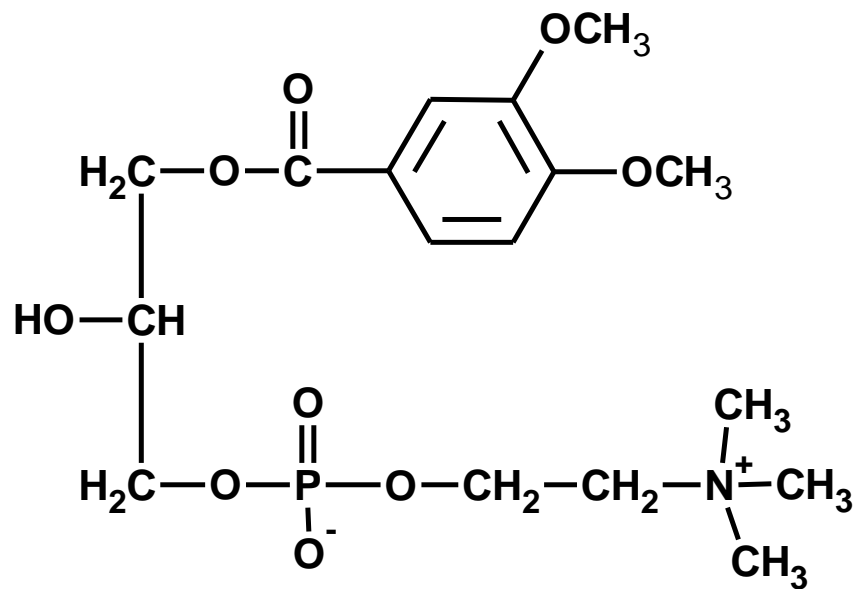

1-veratroyl-2-hydroxy-*sn*-glycero-3-phosphocholine (**7b**)

Figure S26: <sup>1</sup>H NMR spectrum of 7b.

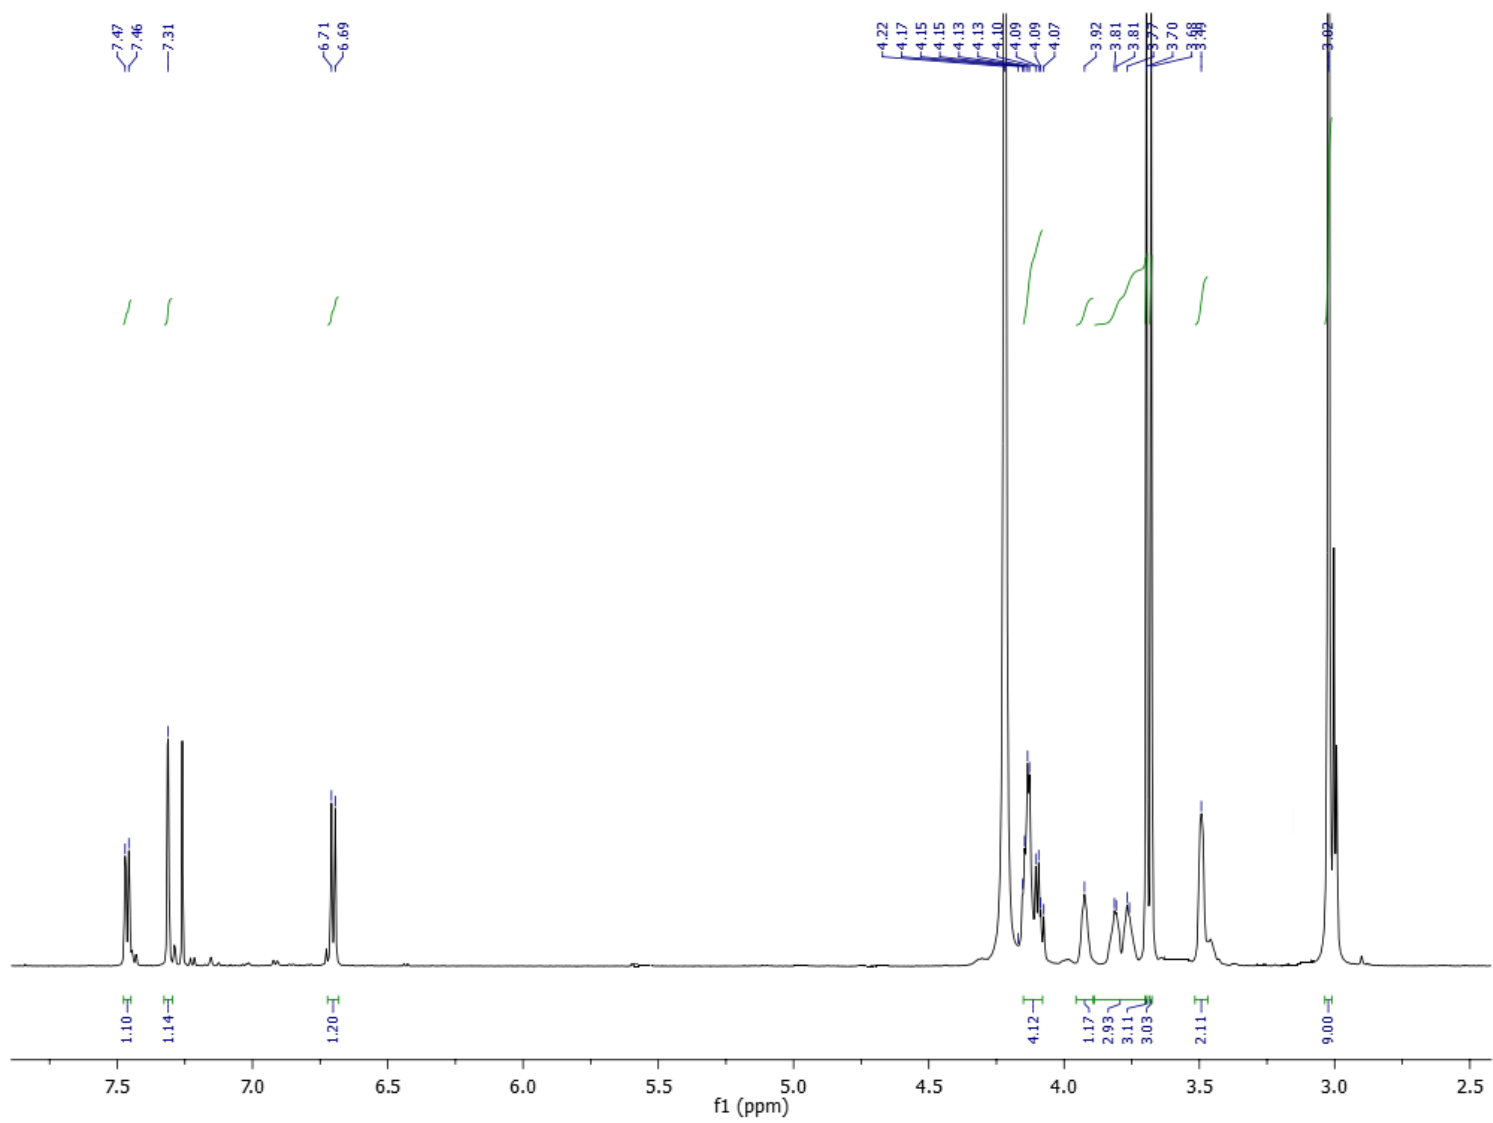

Figure S27:  $^{13}\text{C}$  NMR spectrum of 7b.

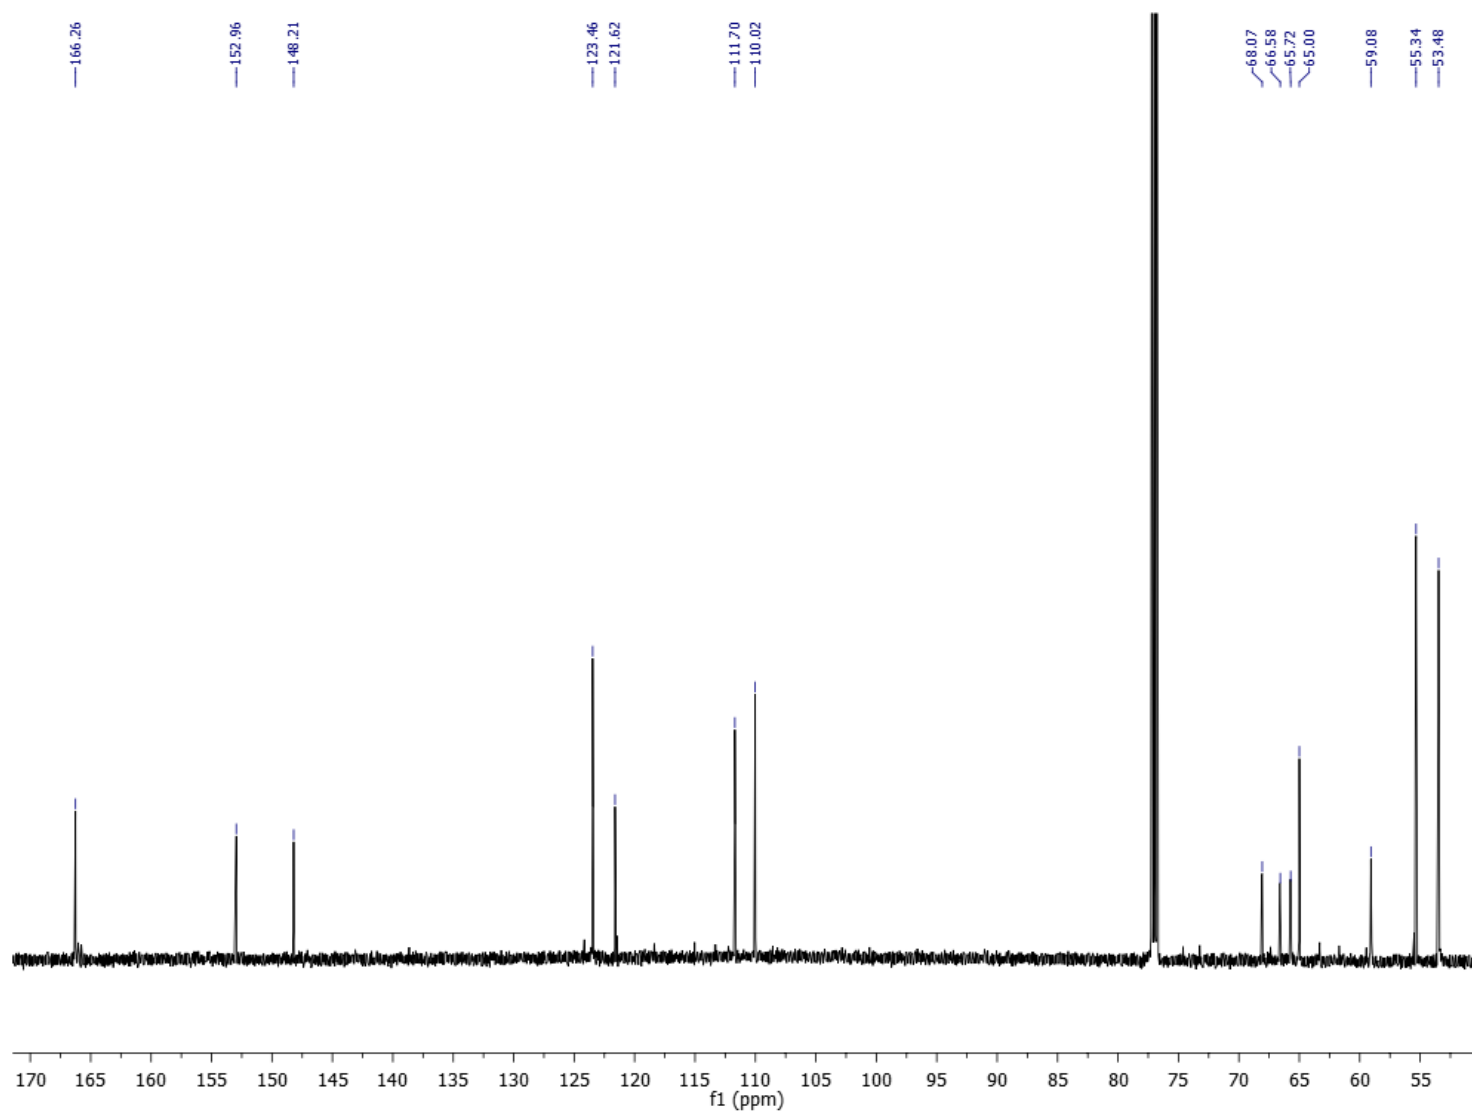

Figure S28:  $^{31}\text{P}$  NMR spectrum of 7b.

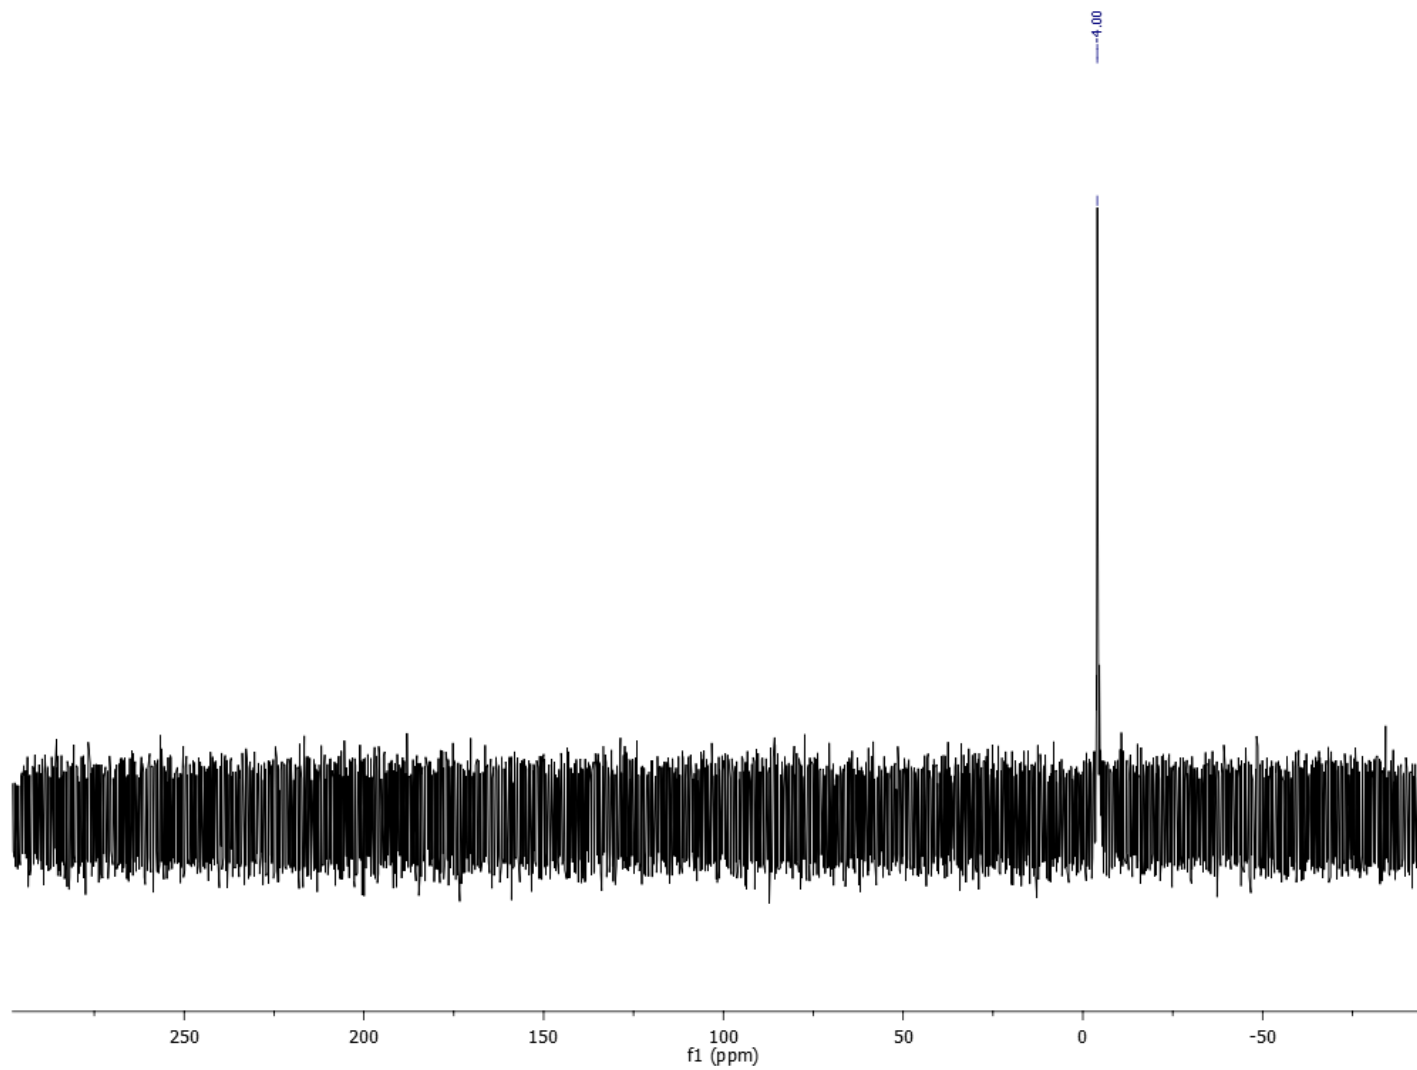

Figure S29:  $^1\text{H} - ^1\text{H}$  COSY spectrum of 7b.

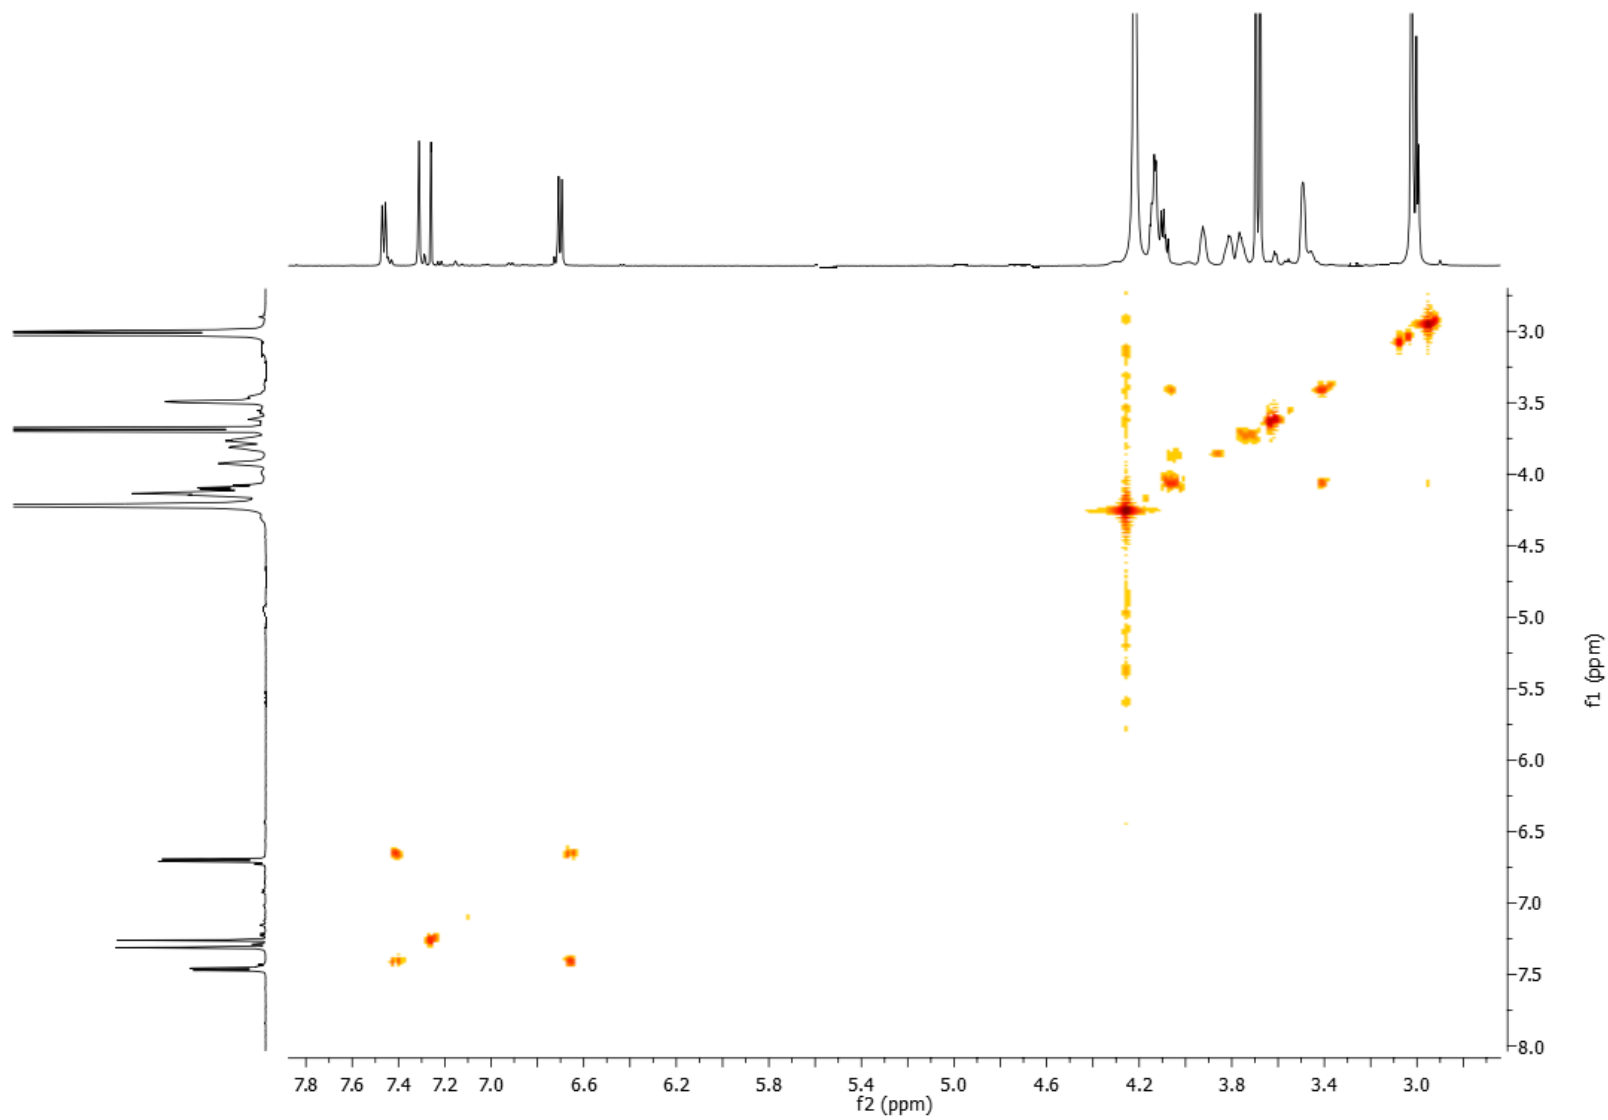

Figure S30: HSQC spectrum of 7b.

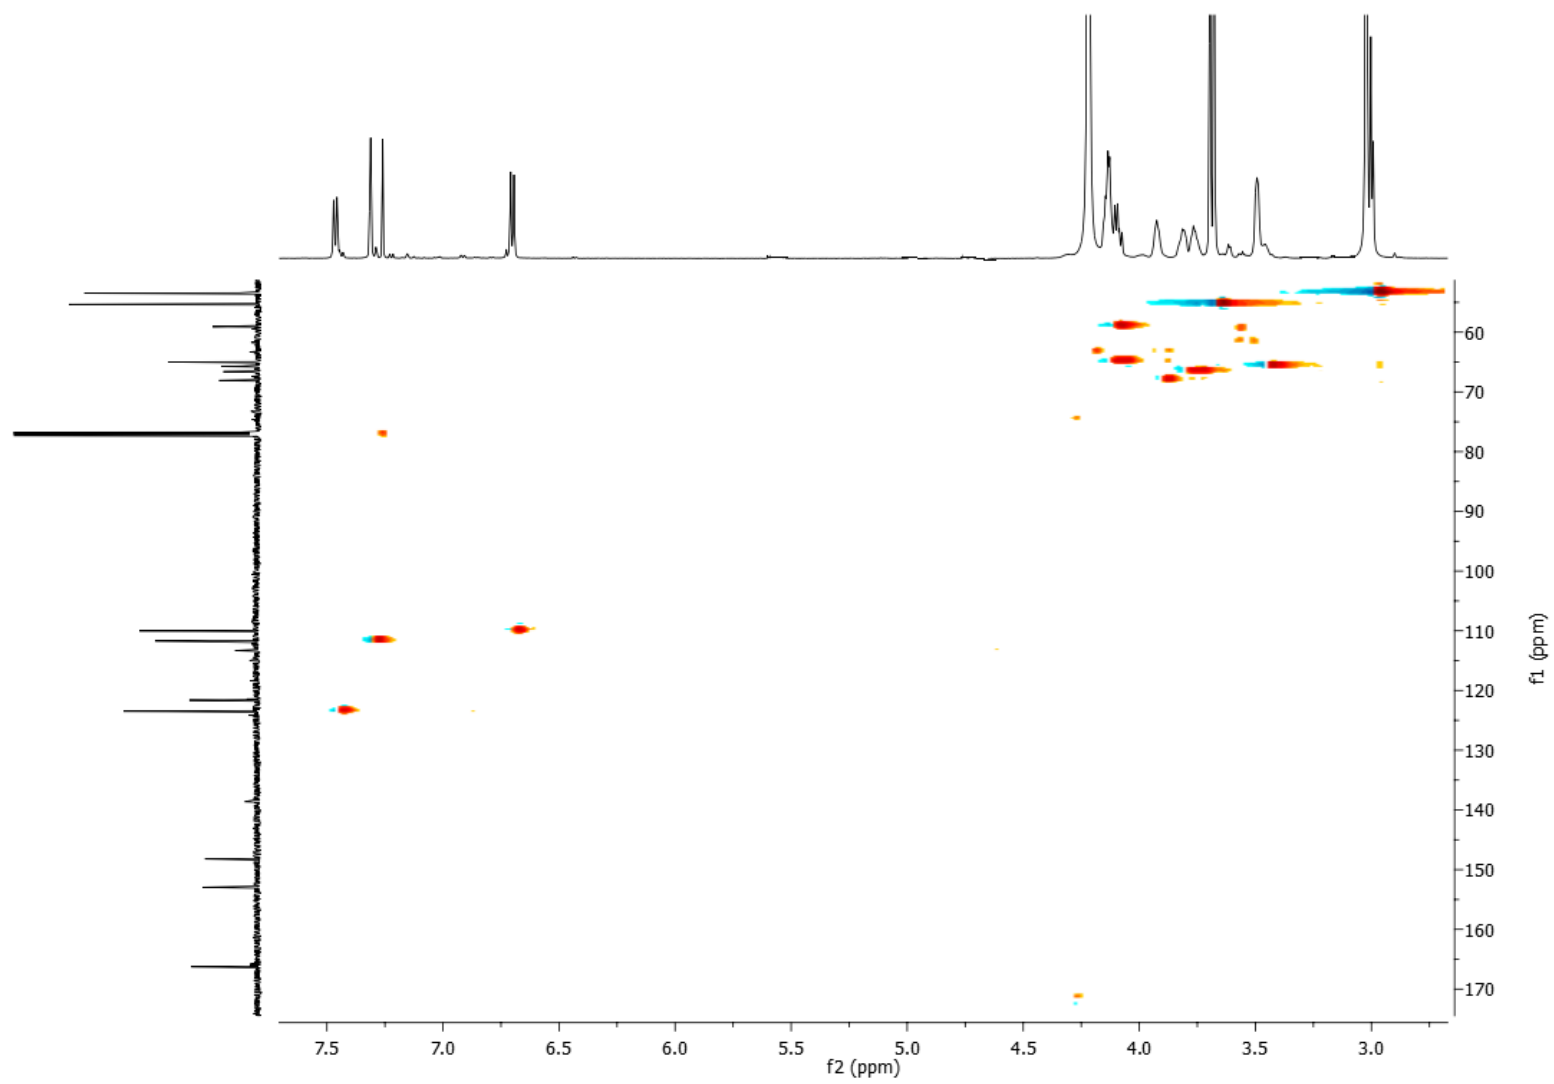

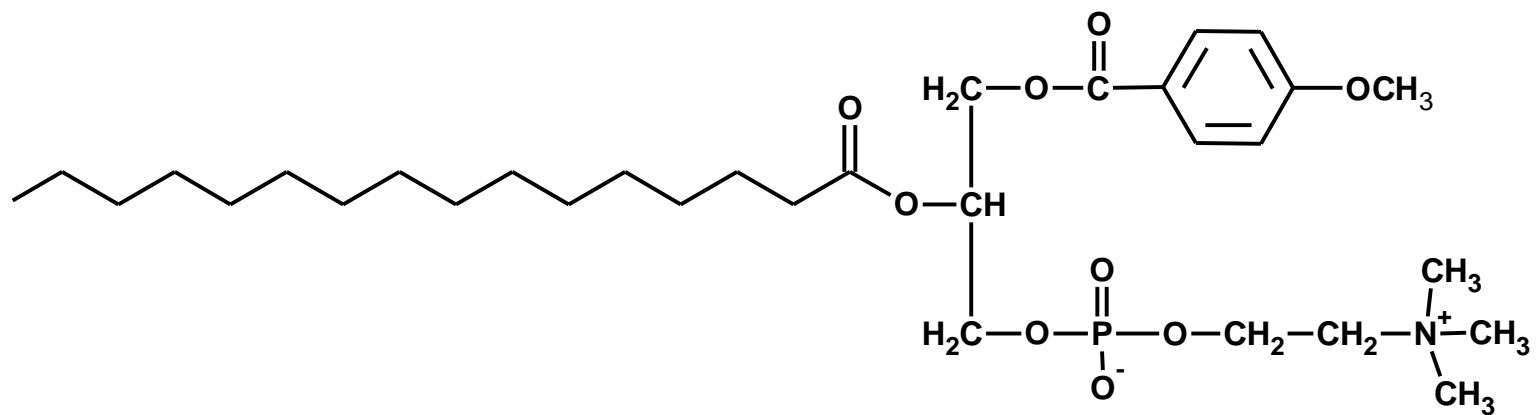

1-anisoyl-2-palmitoyl-*sn*-glycero-3-phosphocholine (8a)

Figure S31: <sup>1</sup>H NMR spectrum of 8a.

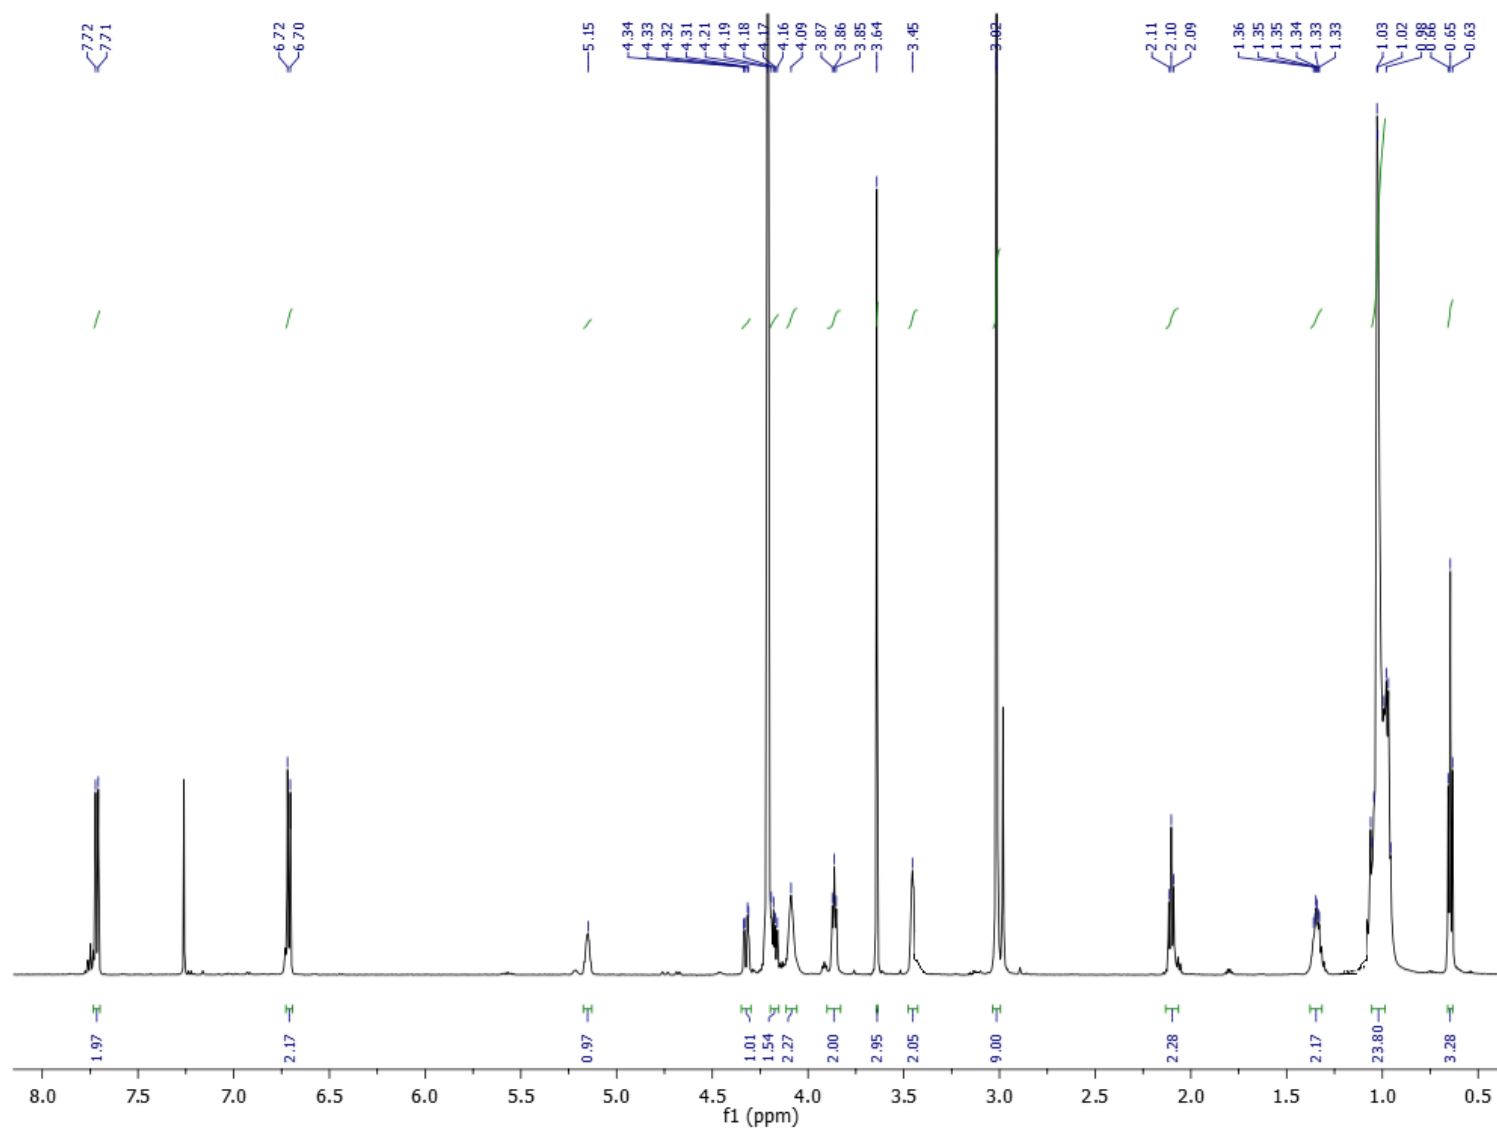



Figure S32:  $^{13}\text{C}$  NMR spectrum of 8a.

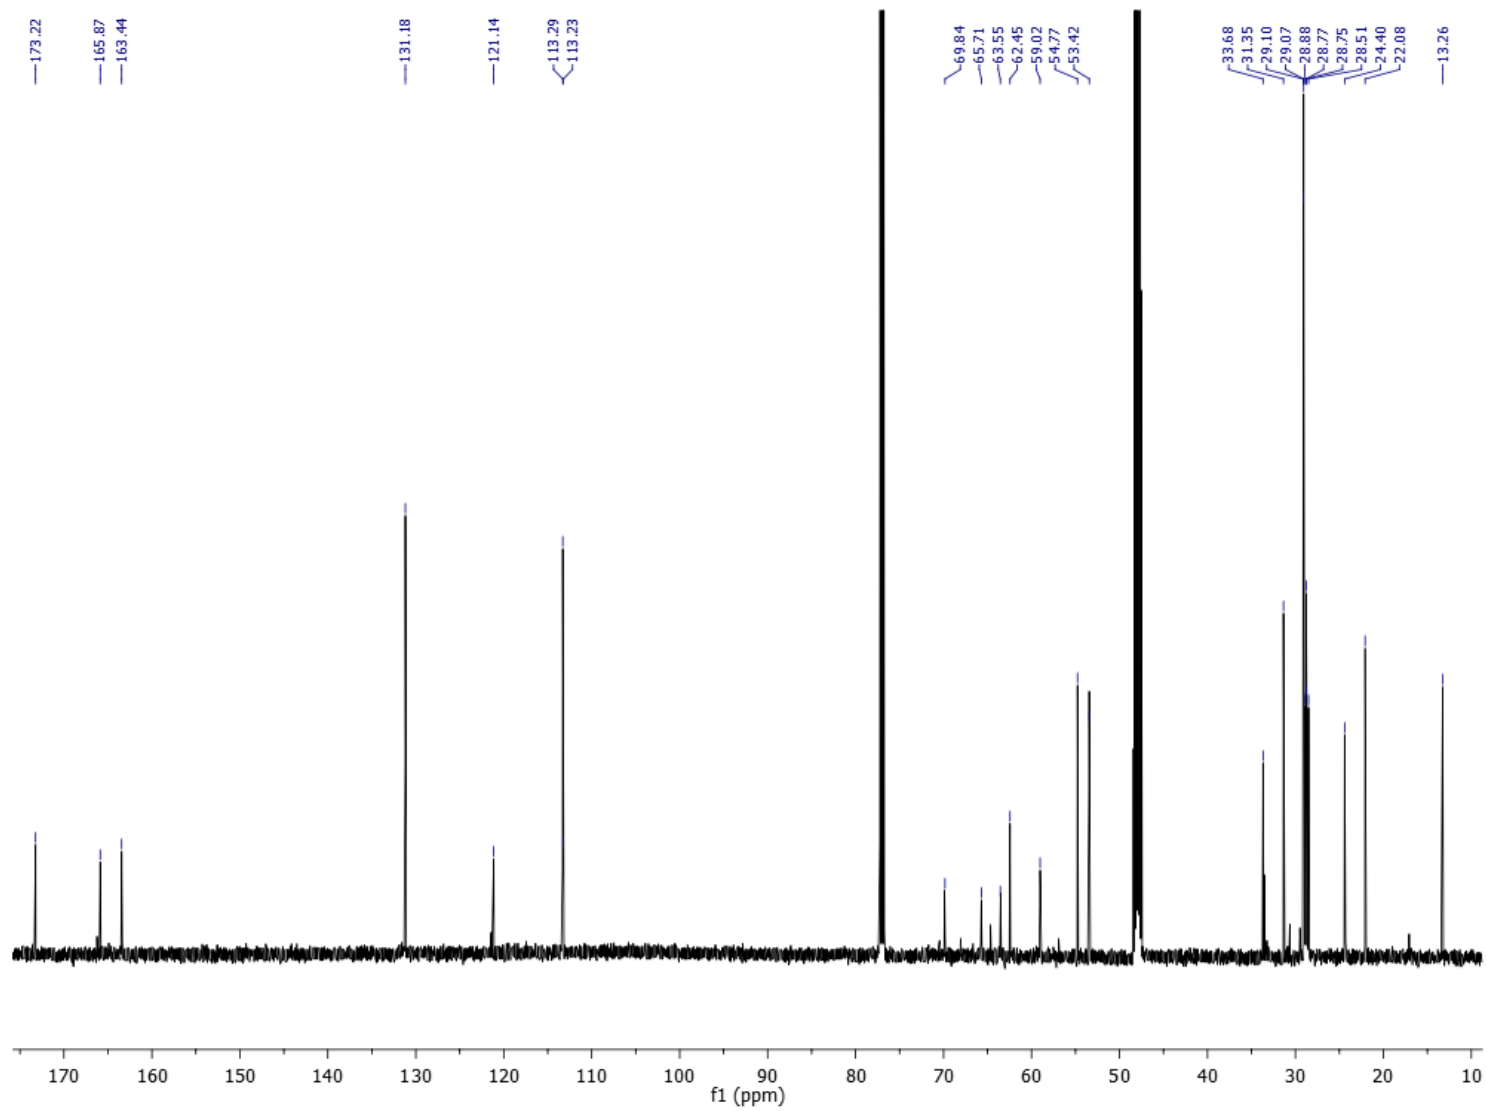

Figure S33:  $^{31}\text{P}$  NMR spectrum of 8a.

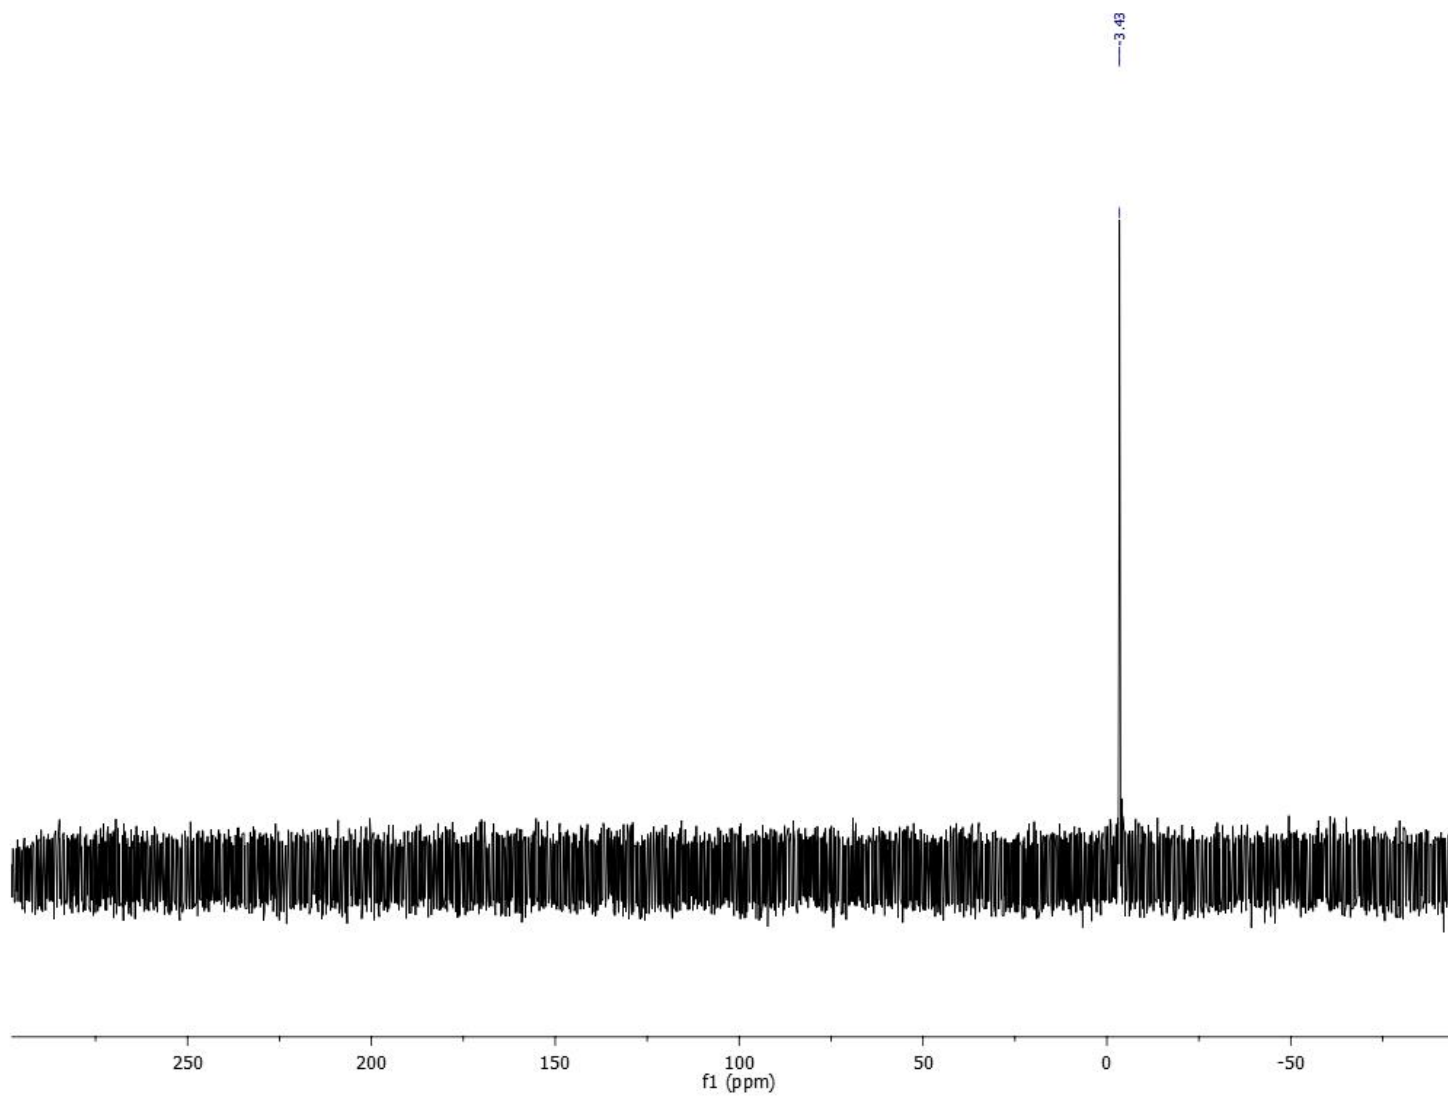

Figure S34:  $^1\text{H} - ^1\text{H}$  COSY spectrum of 8a.

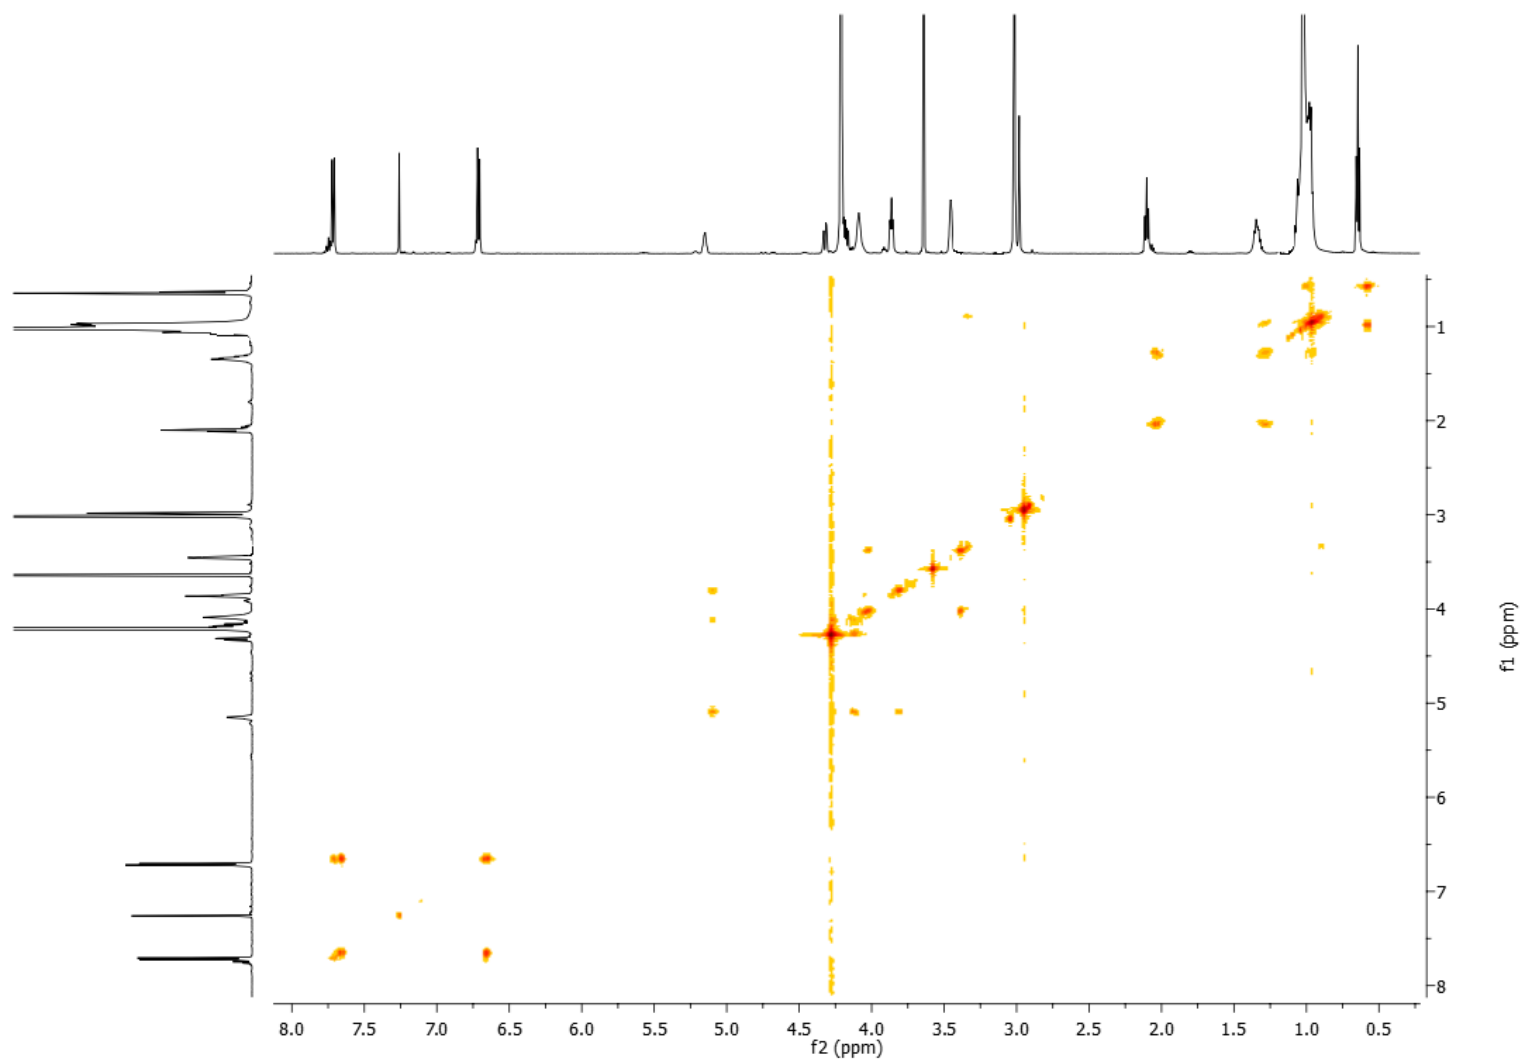

Figure S35: HSQC spectrum of 8a.

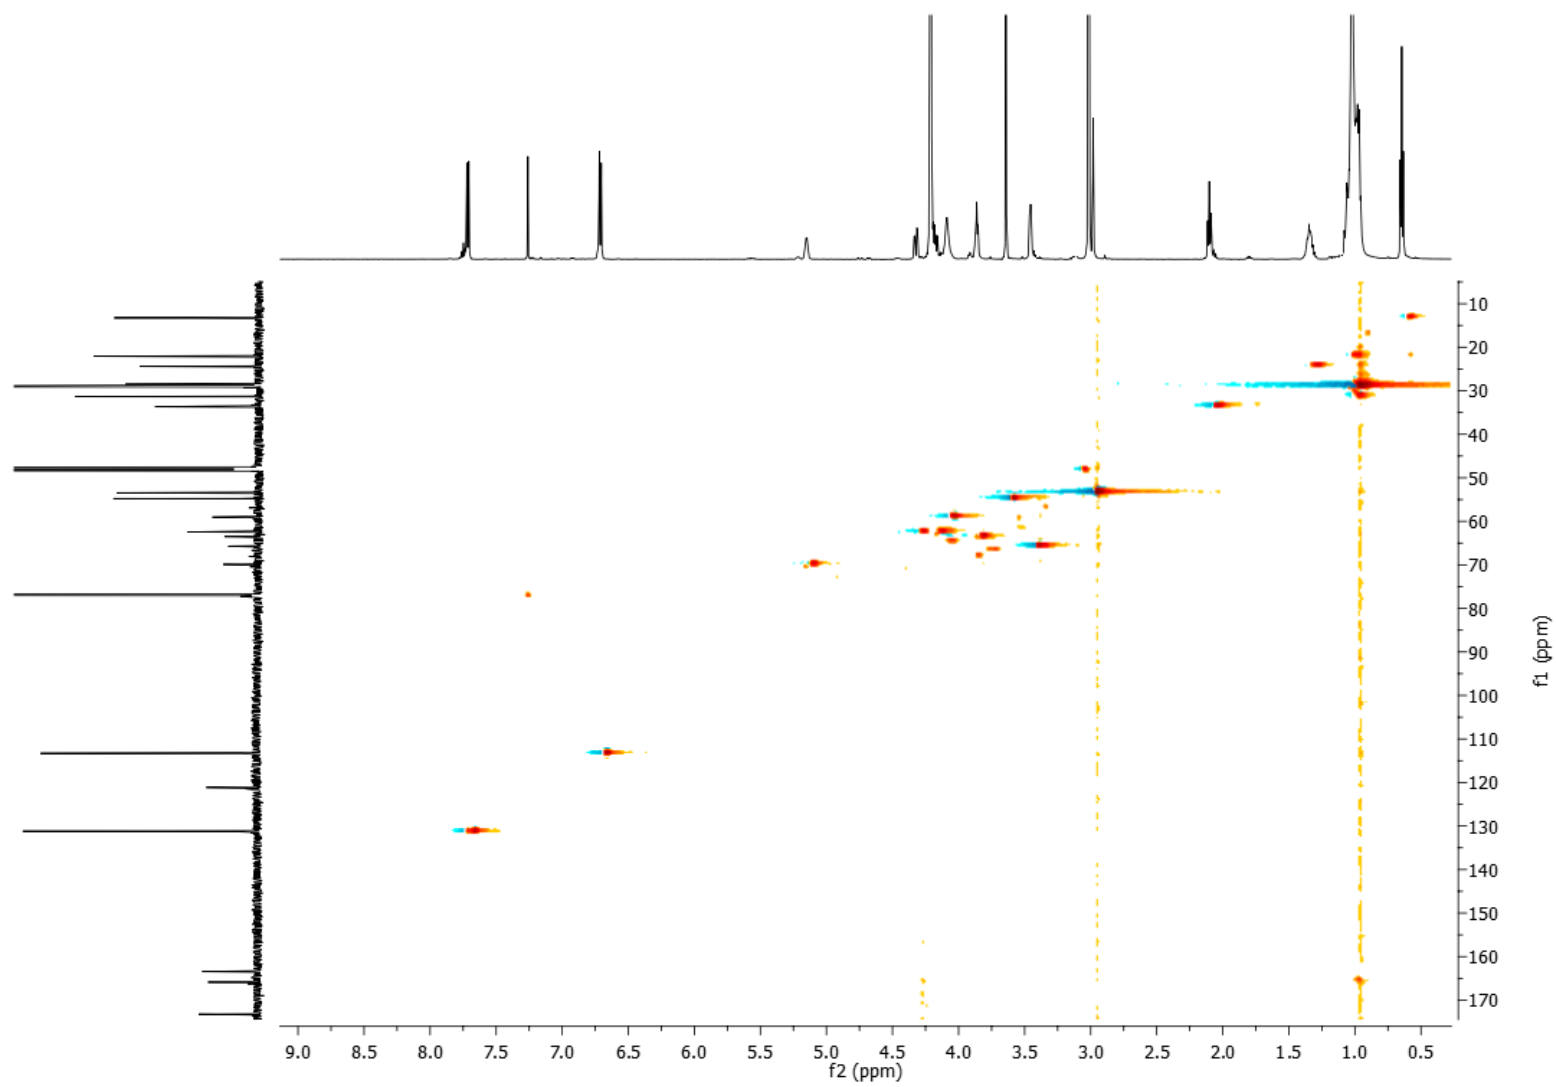

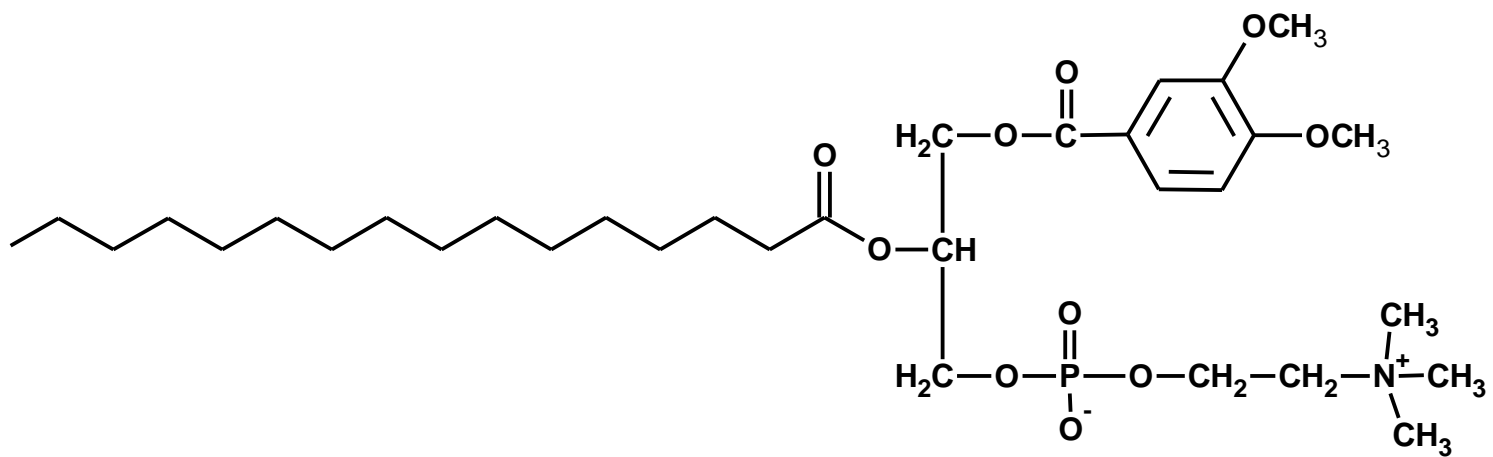

1-veratroyl-2-palmitoyl-*sn*-glycero-3-phosphocholine (**8b**)

Figure S36:  $^1\text{H}$  NMR spectrum of 8b.

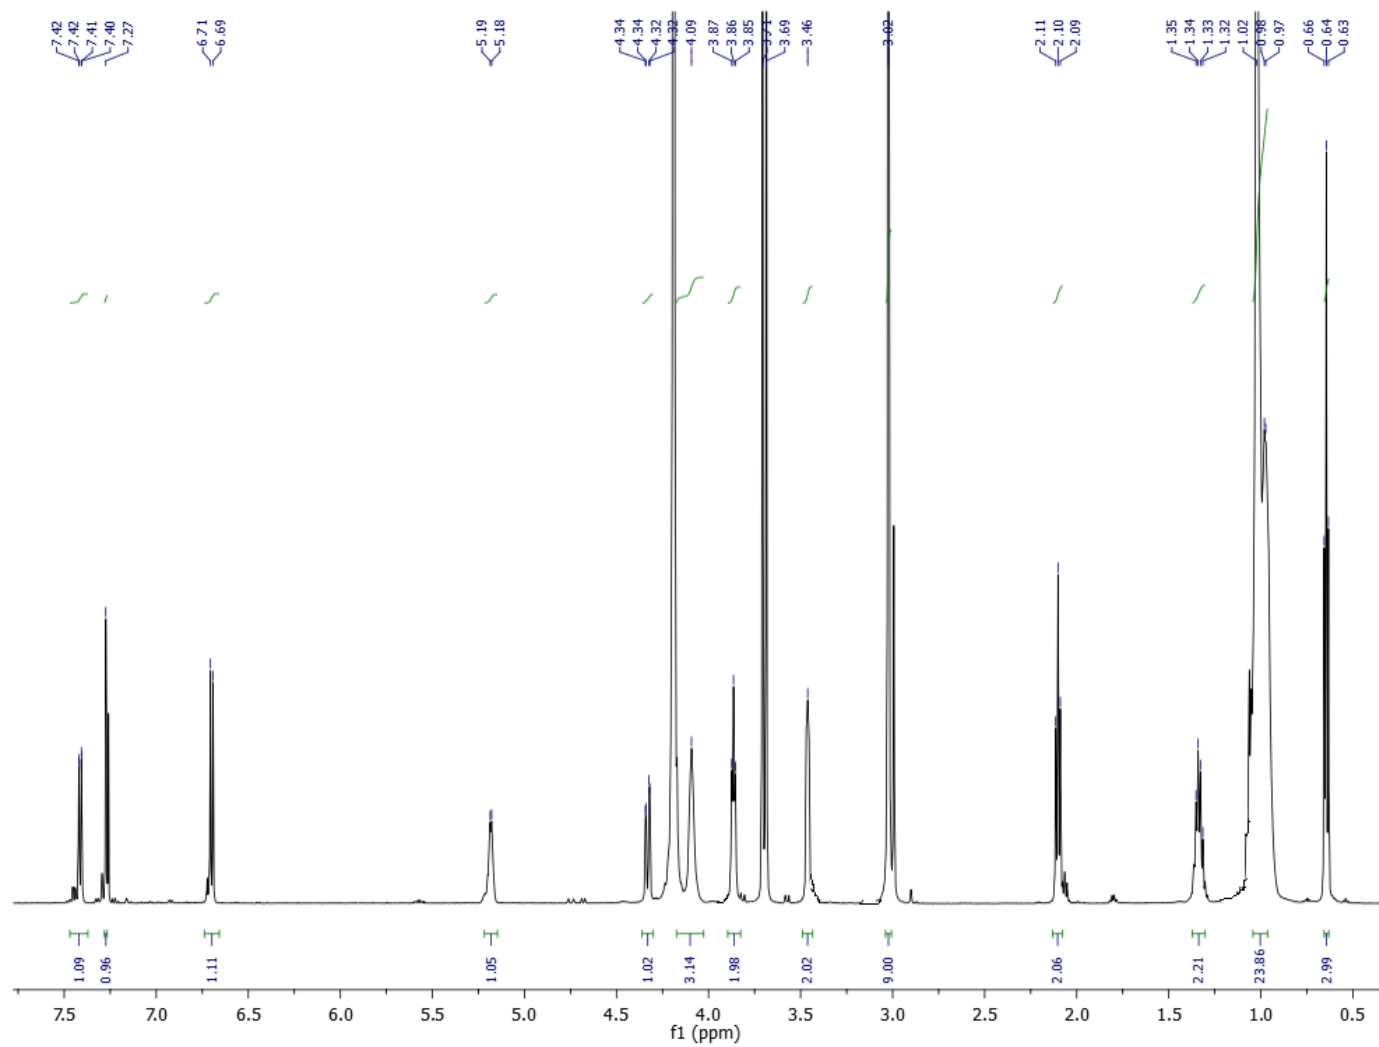

Figure S37:  $^{13}\text{C}$  NMR spectrum of 8b.

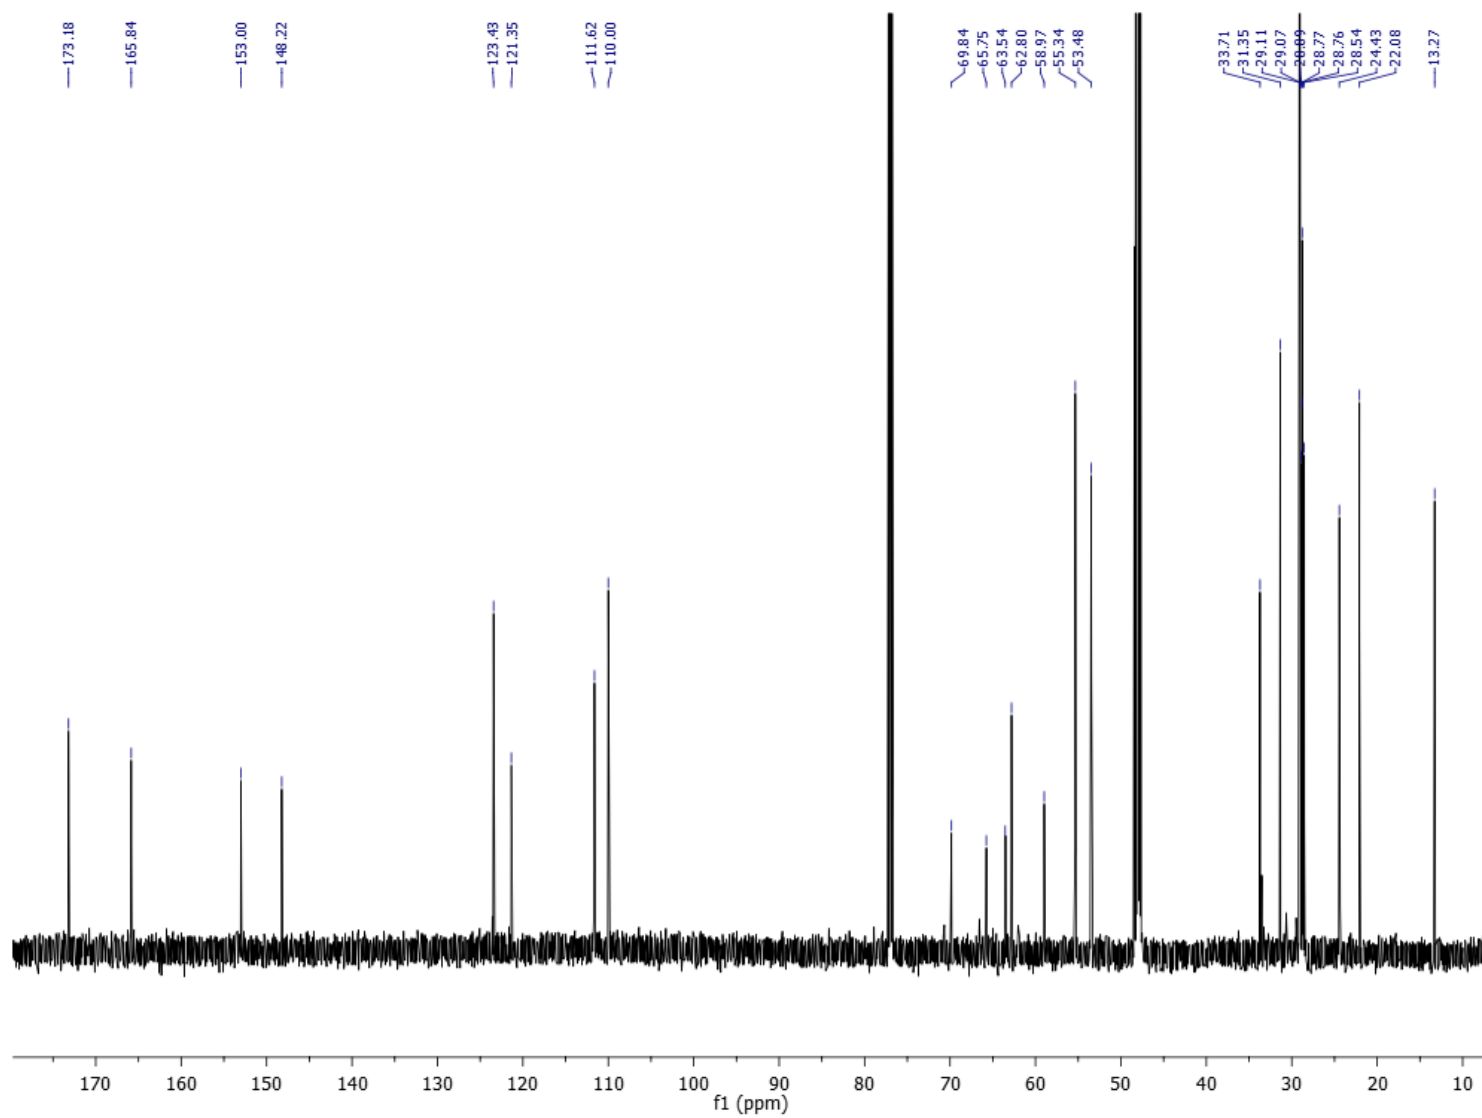

Figure S38:  $^{31}\text{P}$  NMR spectrum of 8b.

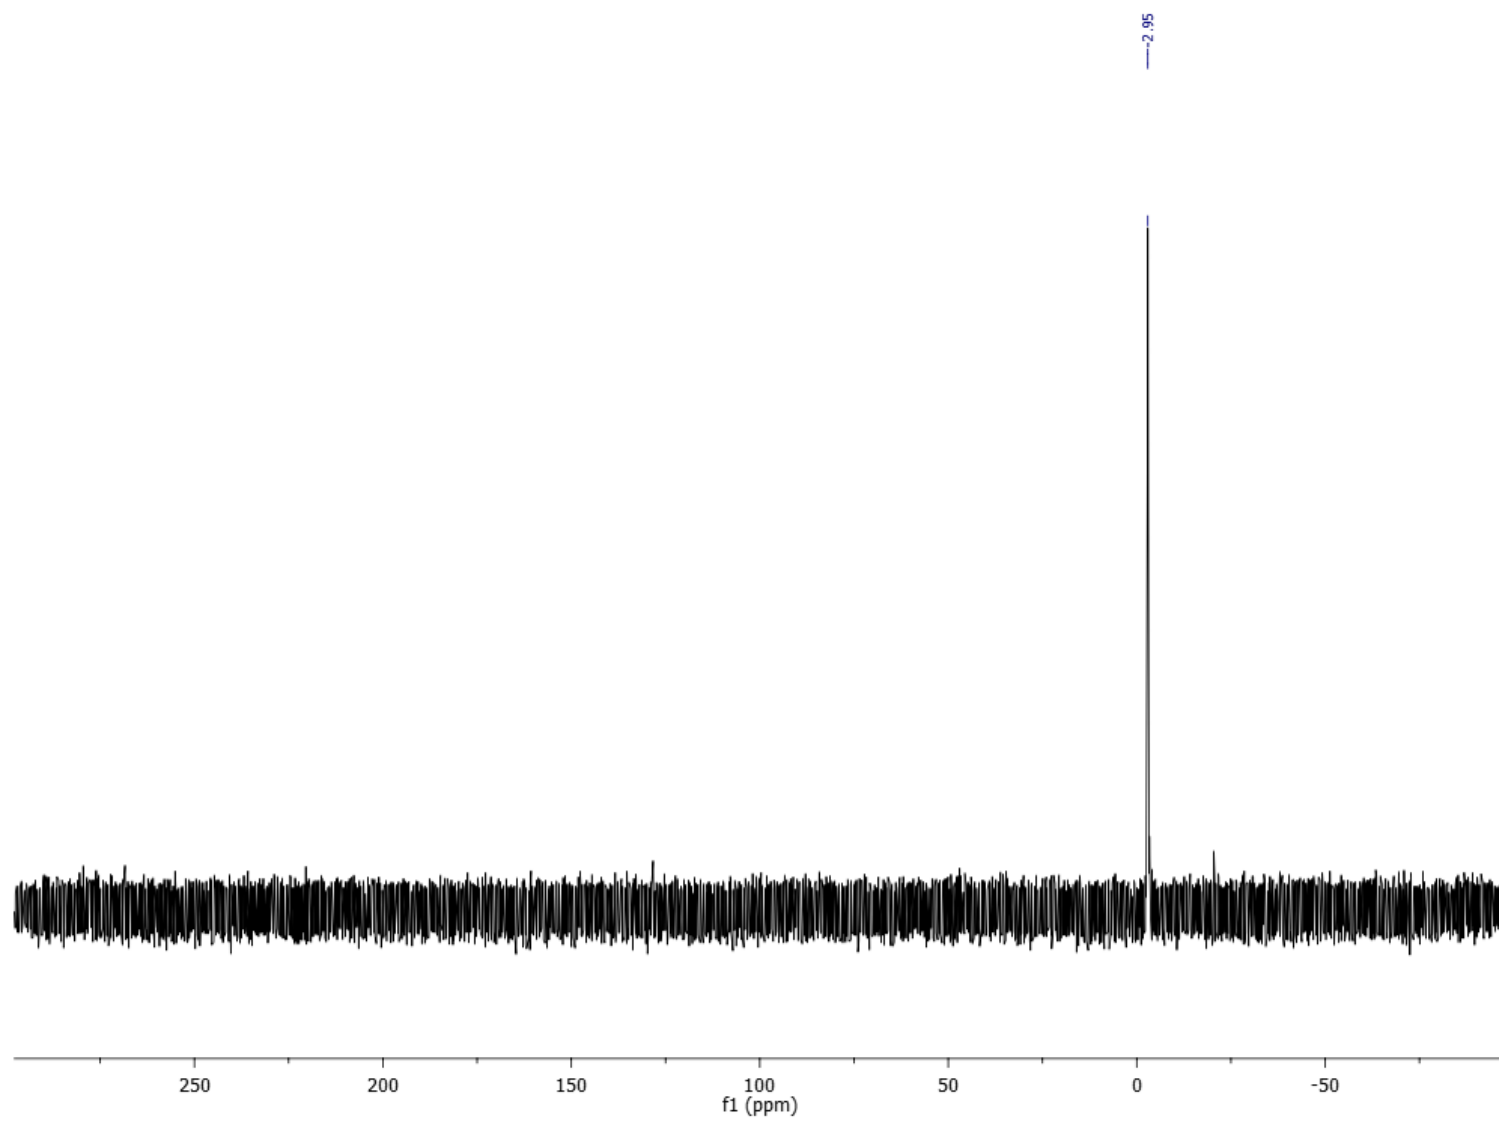



Figure S39:  $^1\text{H} - ^1\text{H}$  COSY spectrum of 8b.

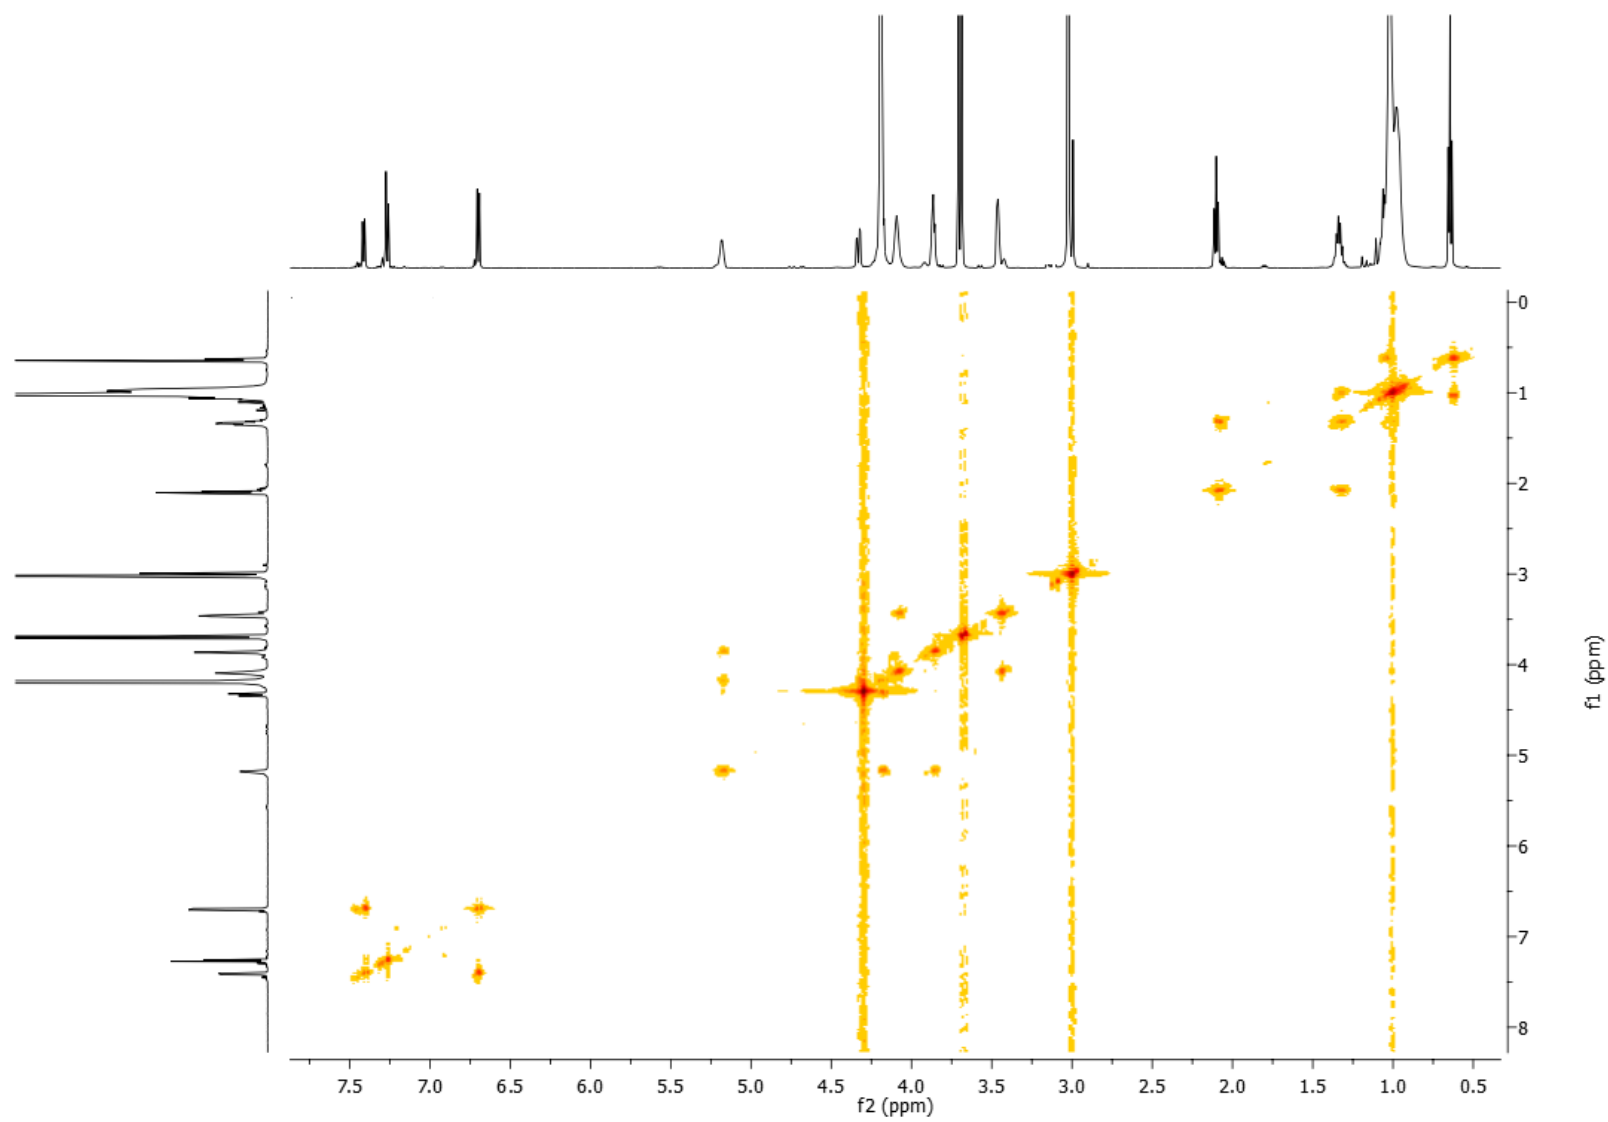

Figure S40: HSQC spectrum of 8b.

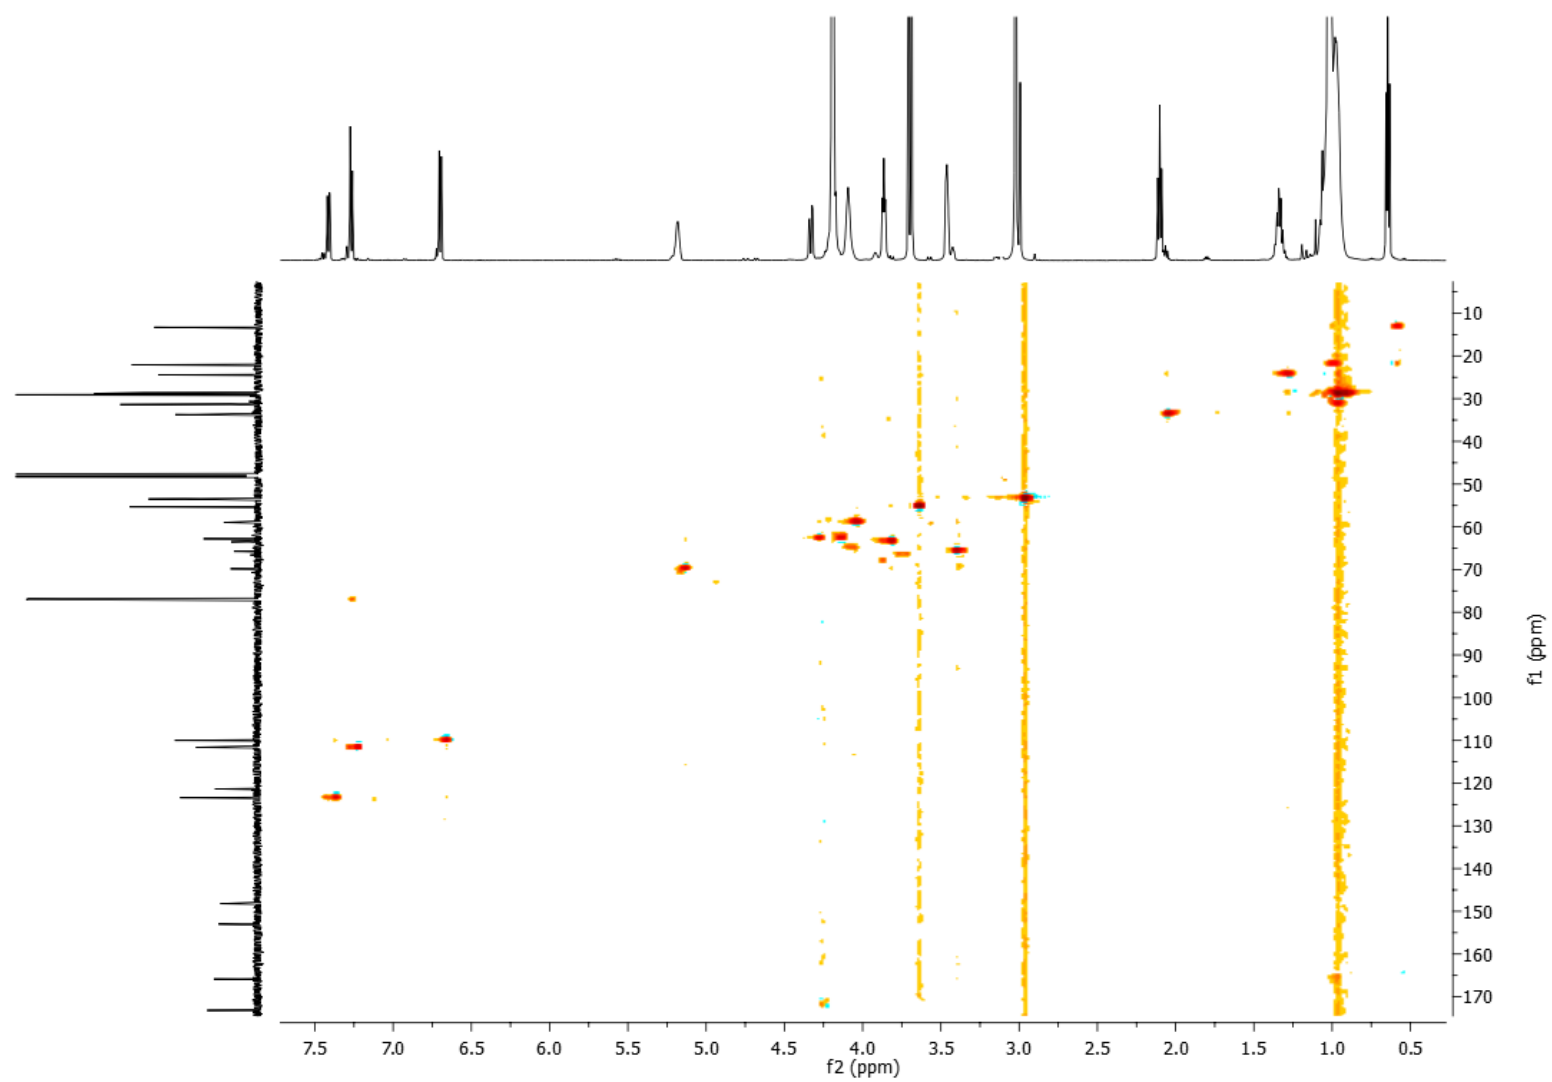

Supplement: molecules-23-02022-s001.pdf [file molecules-23-02022-s001.pdf]
